# Supplementary material for: The Exomes of the NCI-60 Panel: A Genomic Resource for Cancer Biology and Systems Pharmacology
Source: Oxford University Press journal article supplement (doi:10.1158/0008-5472.can-12-3342), 2013-07-15

ALK

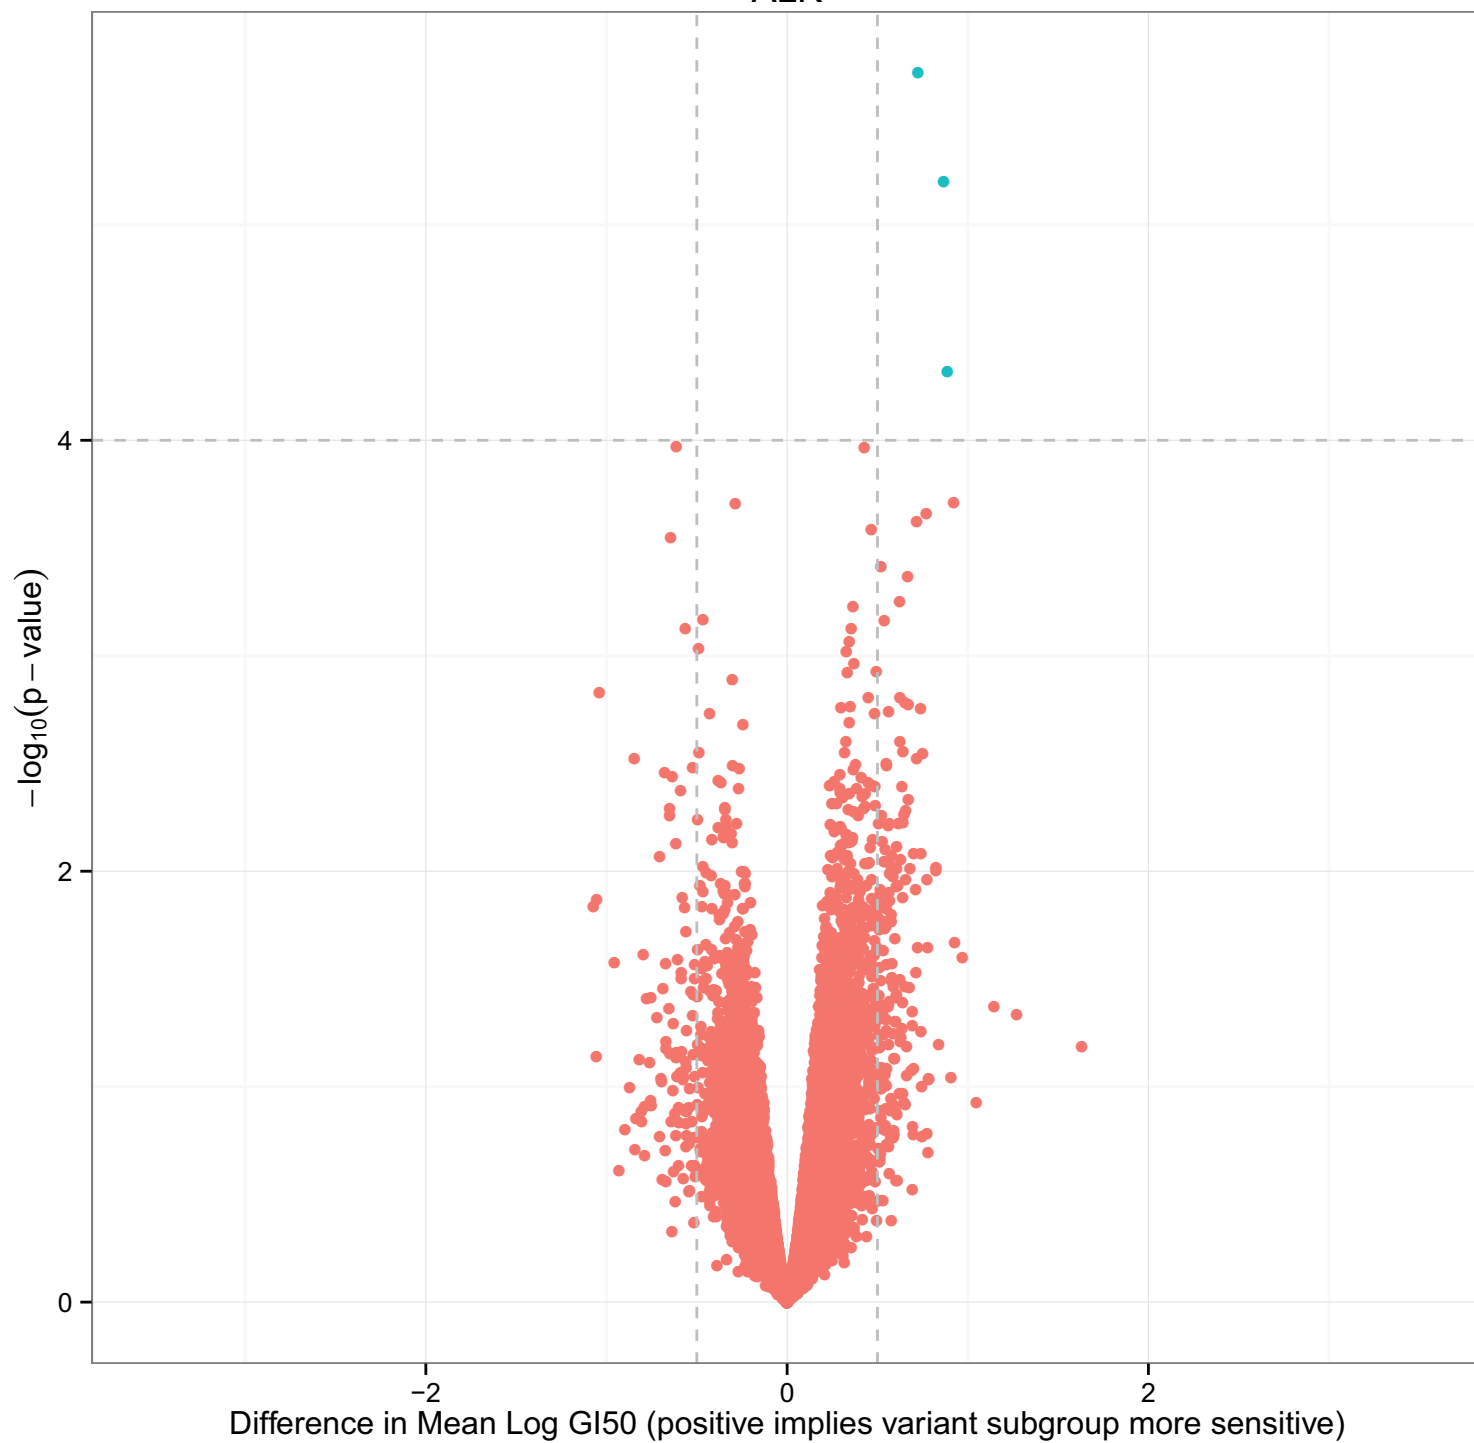

APC

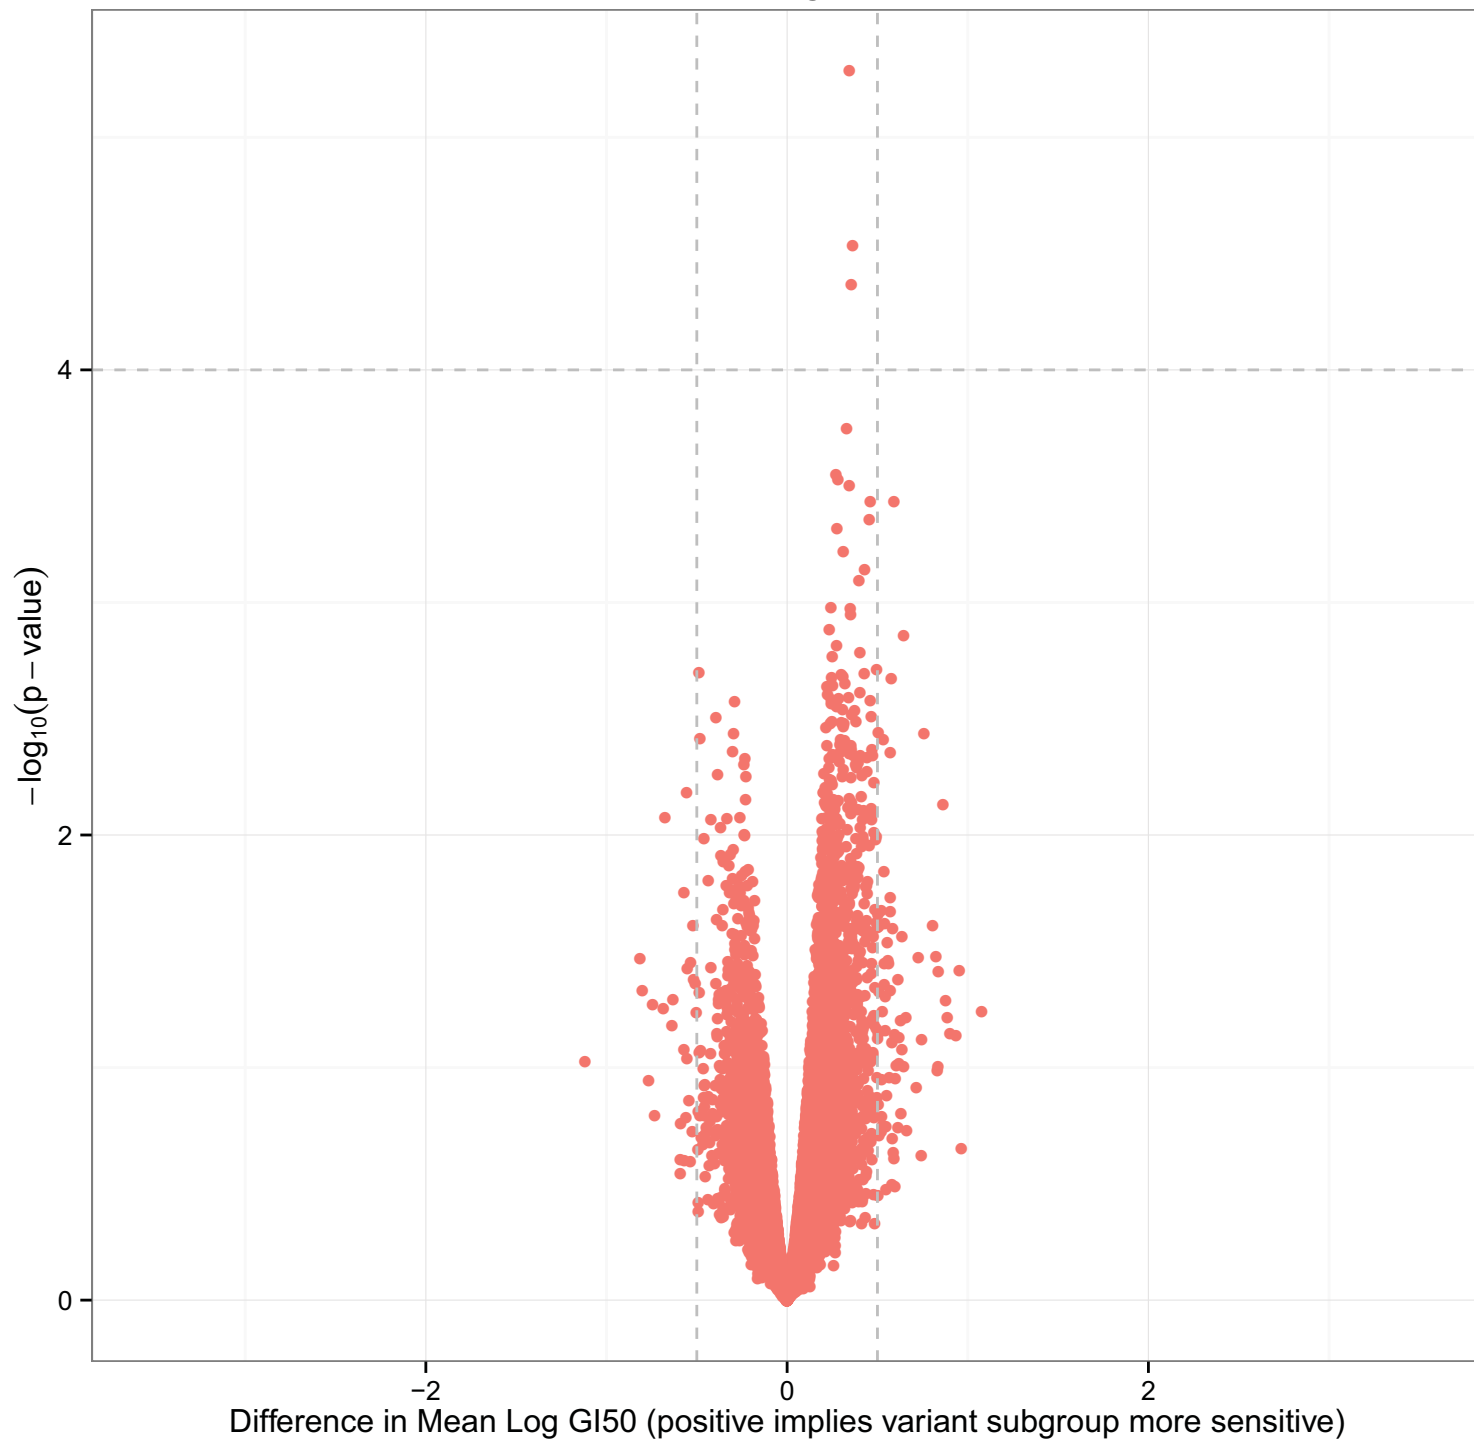

# ARID1A

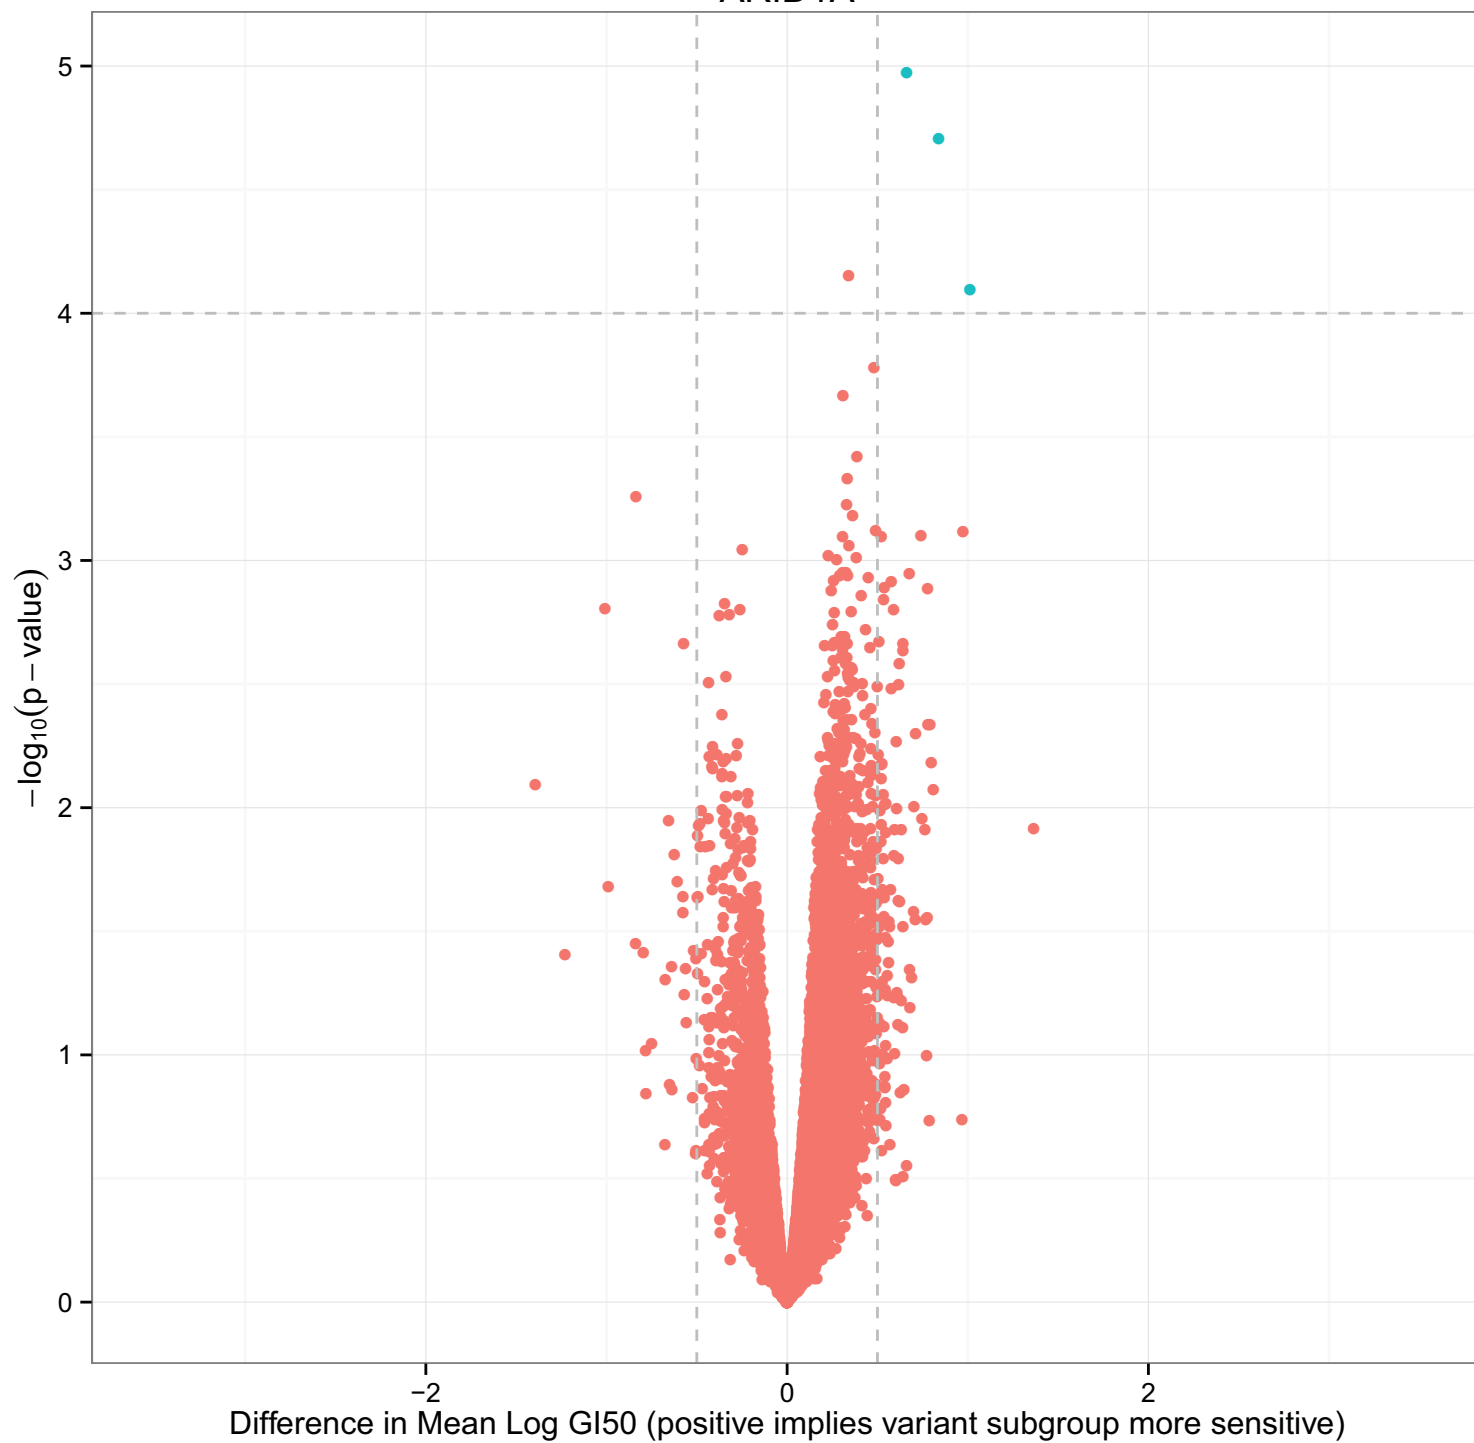

ATM

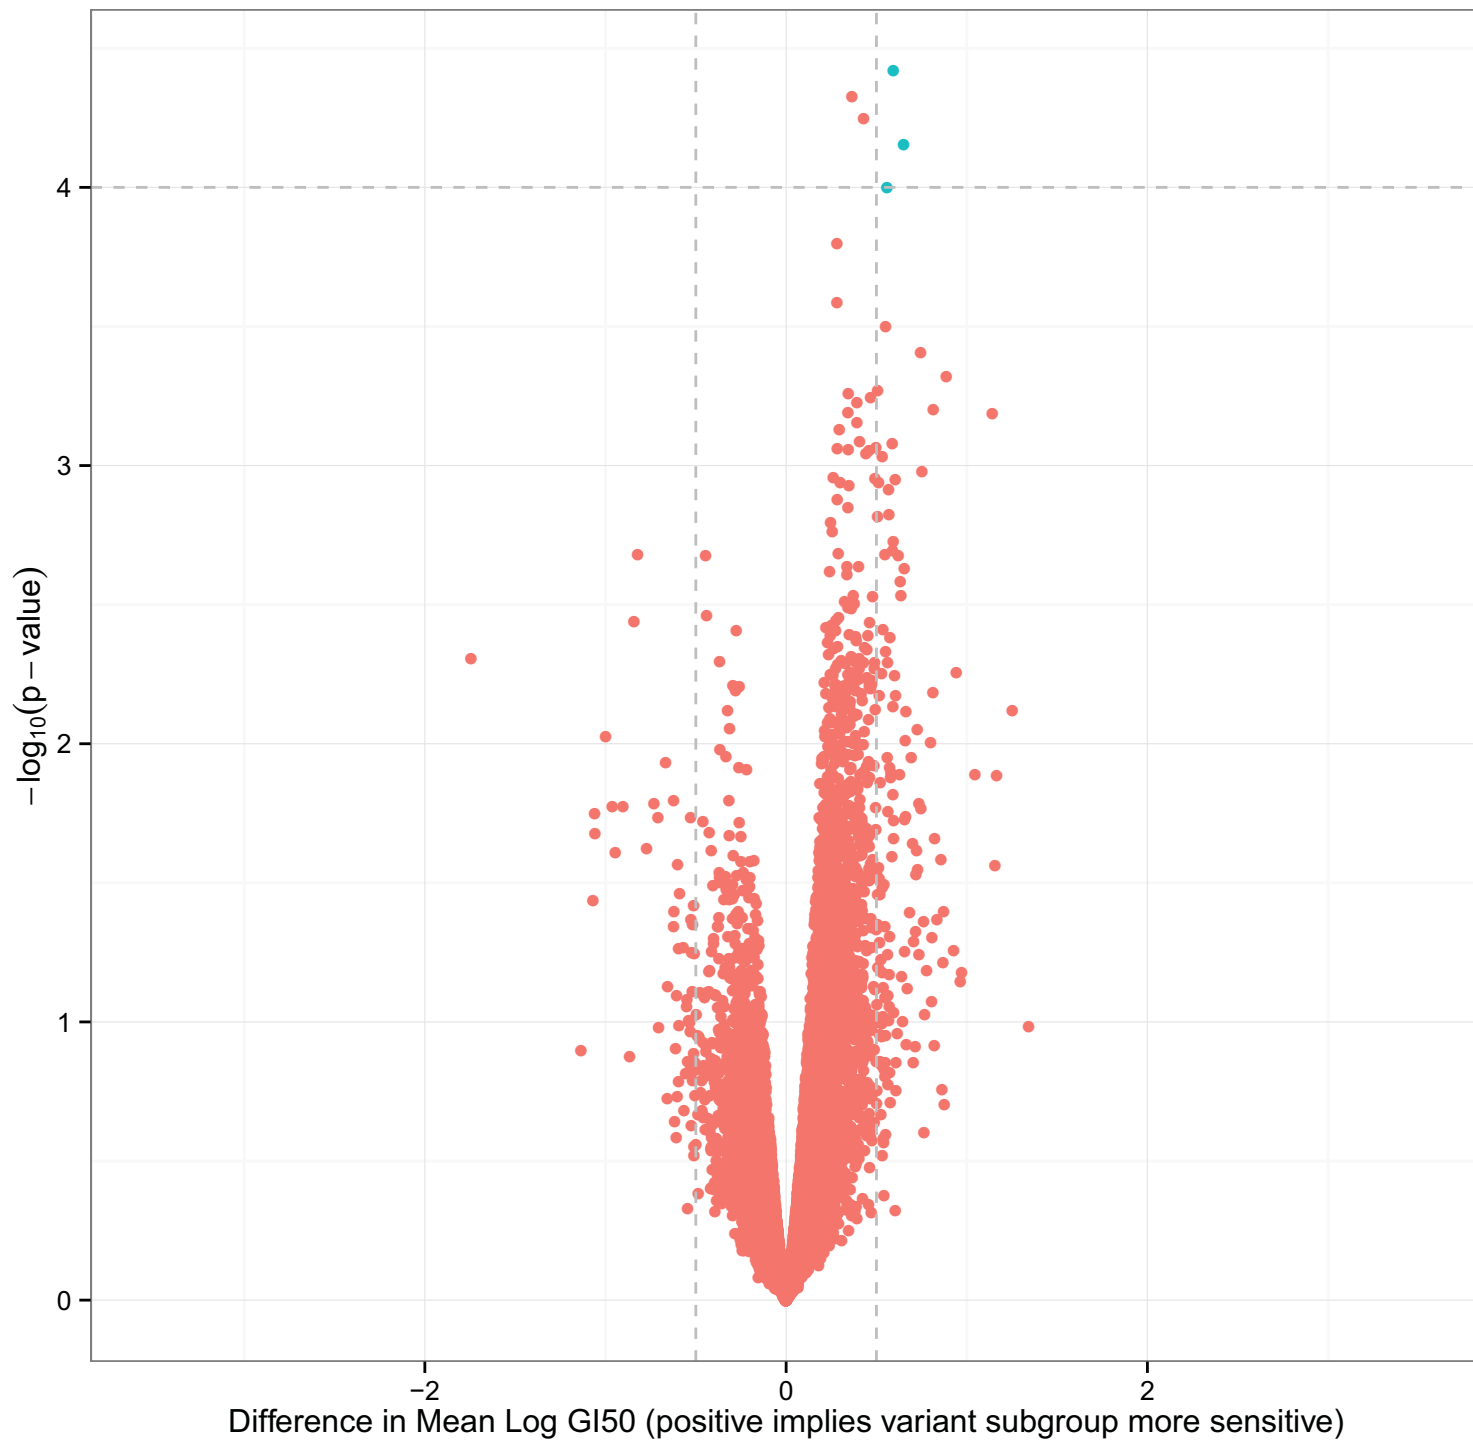

ATR

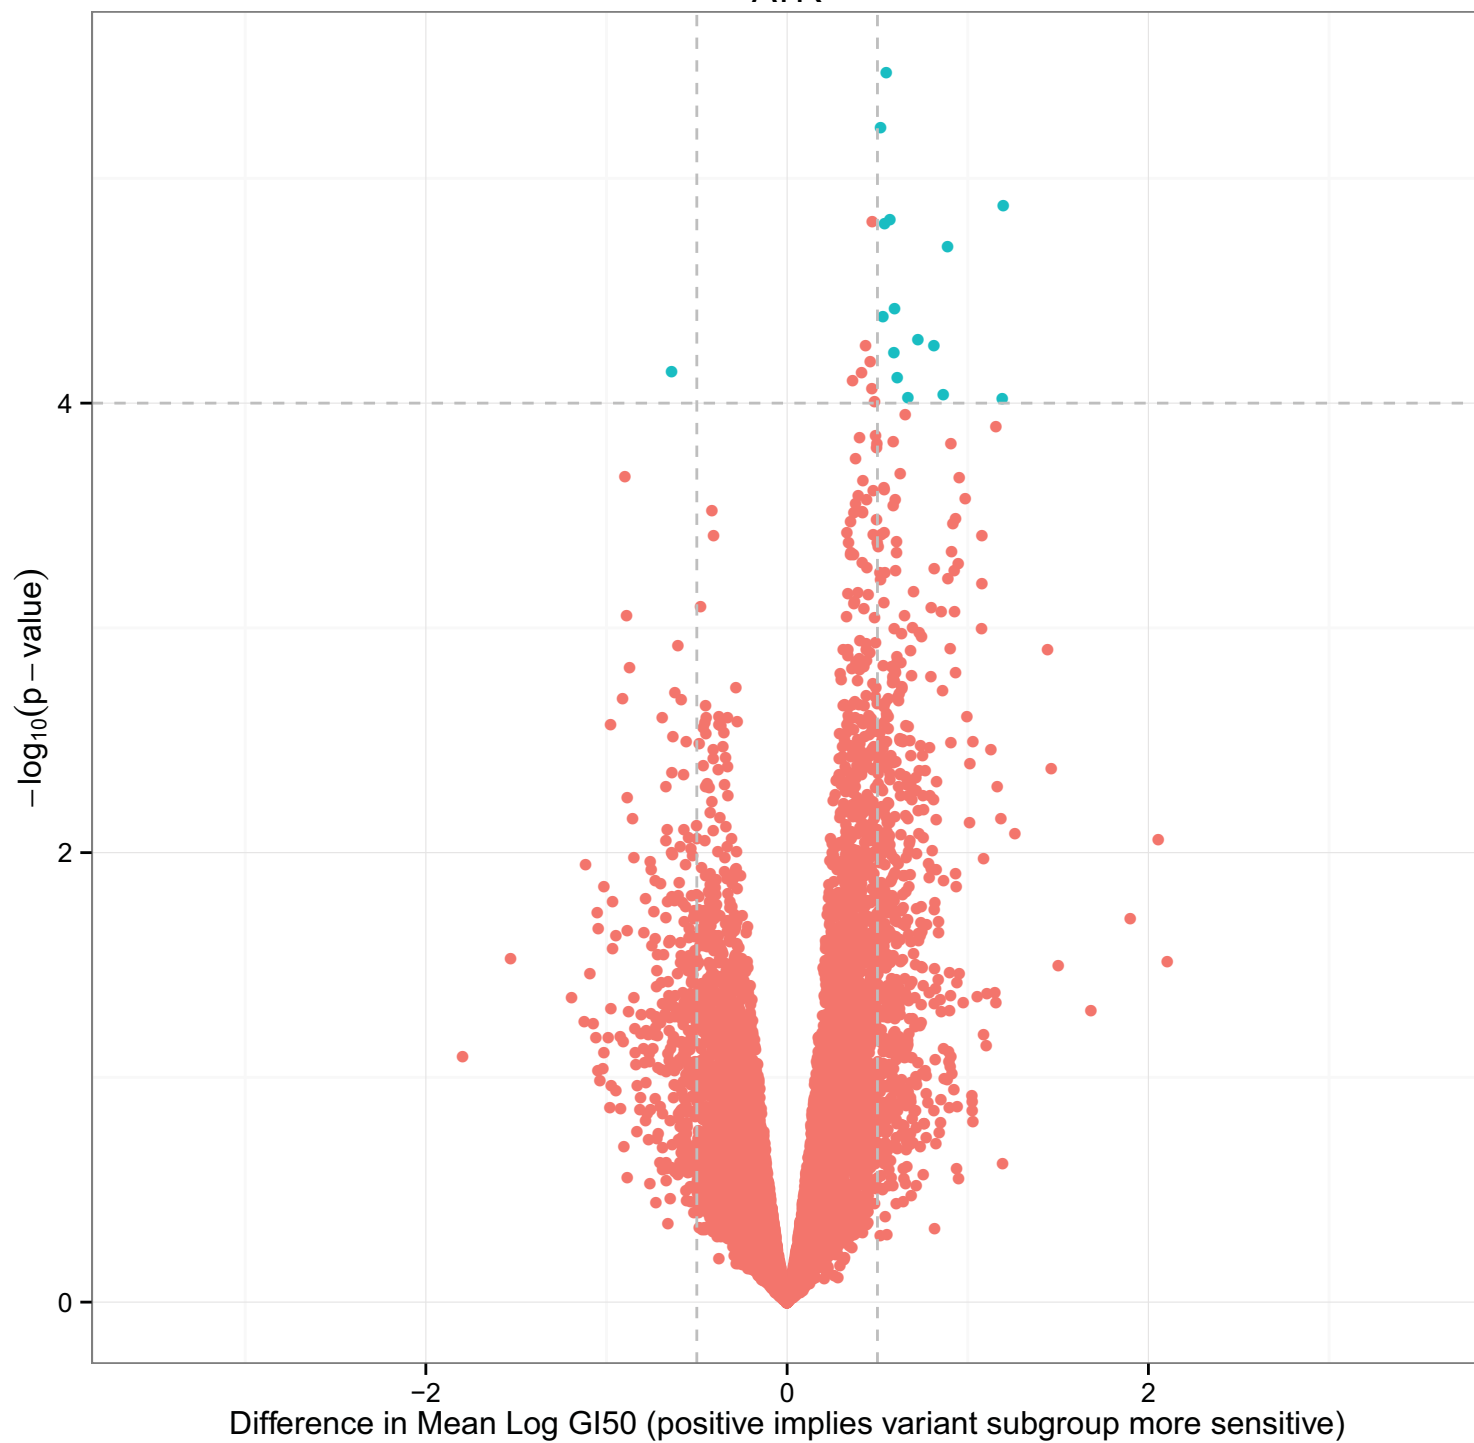

BRAF

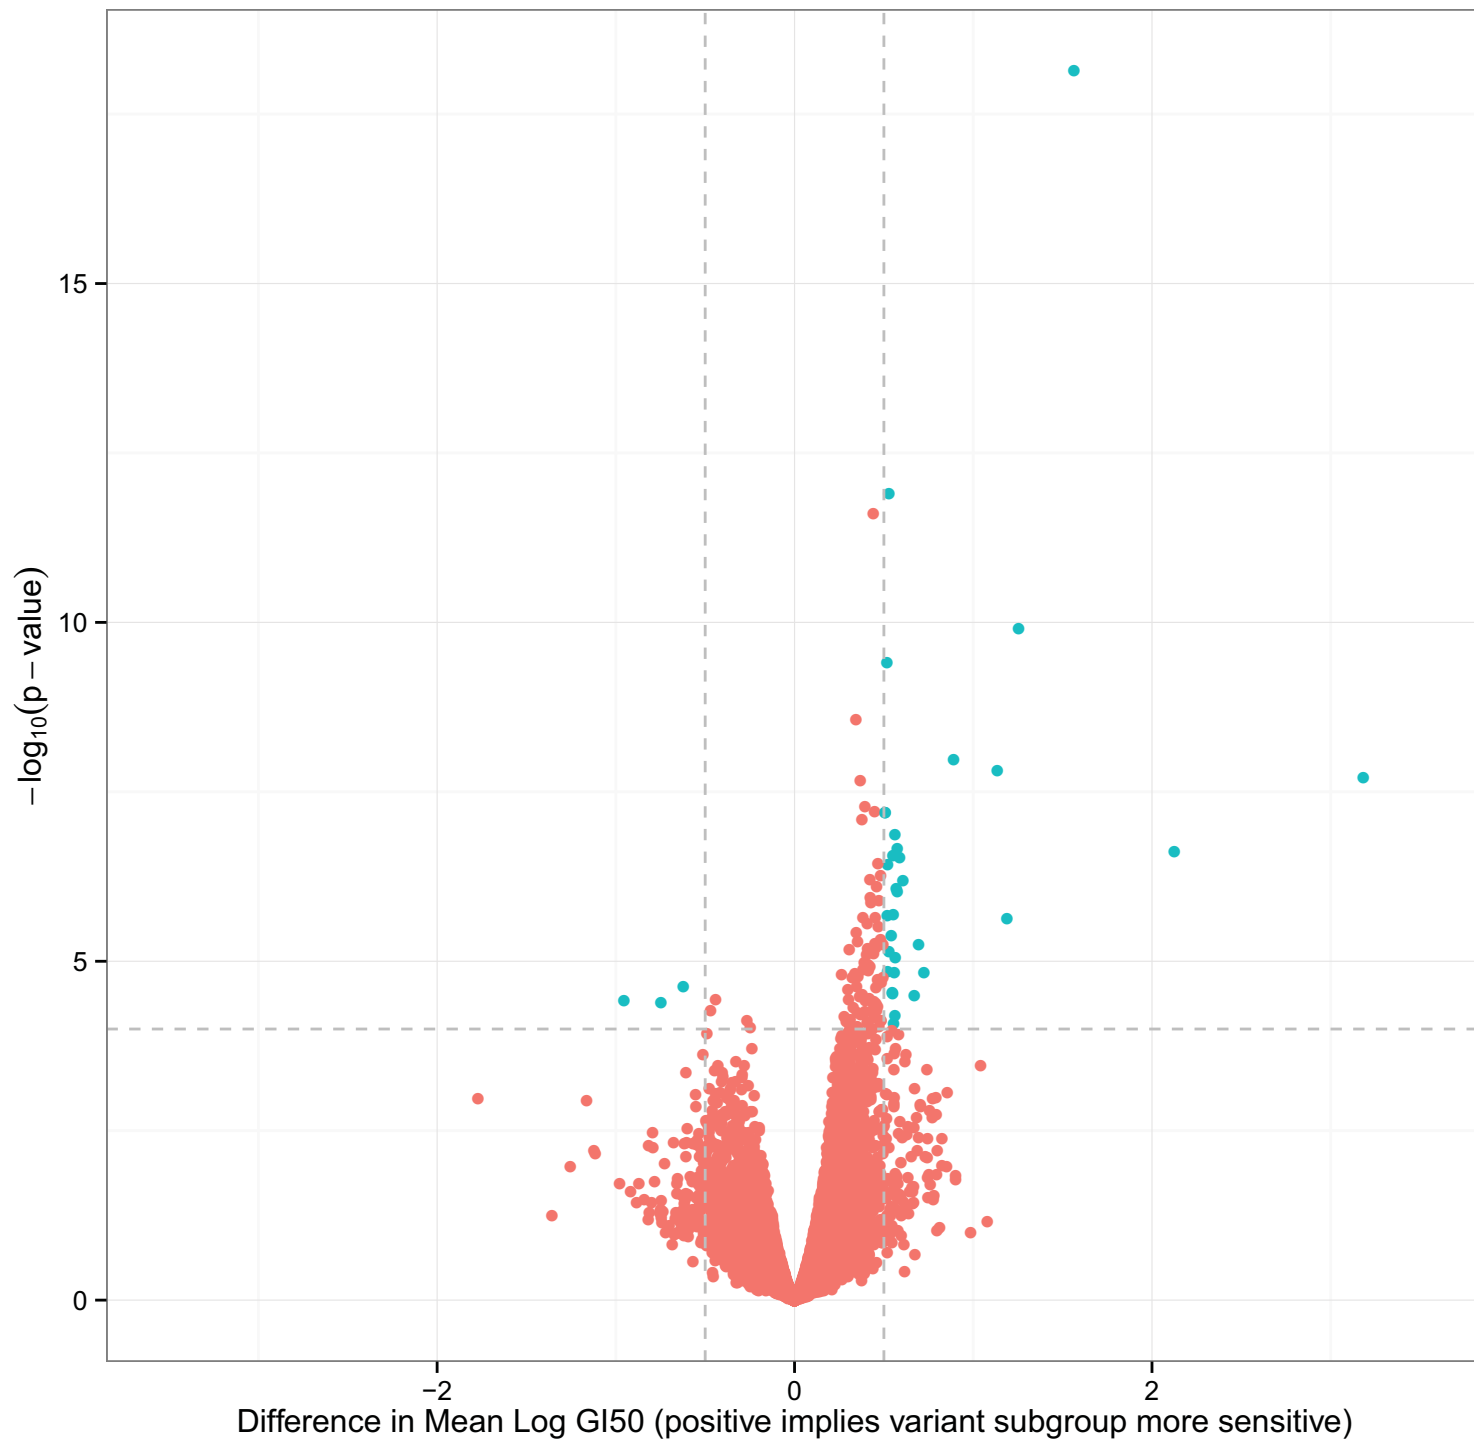

# BRCA1

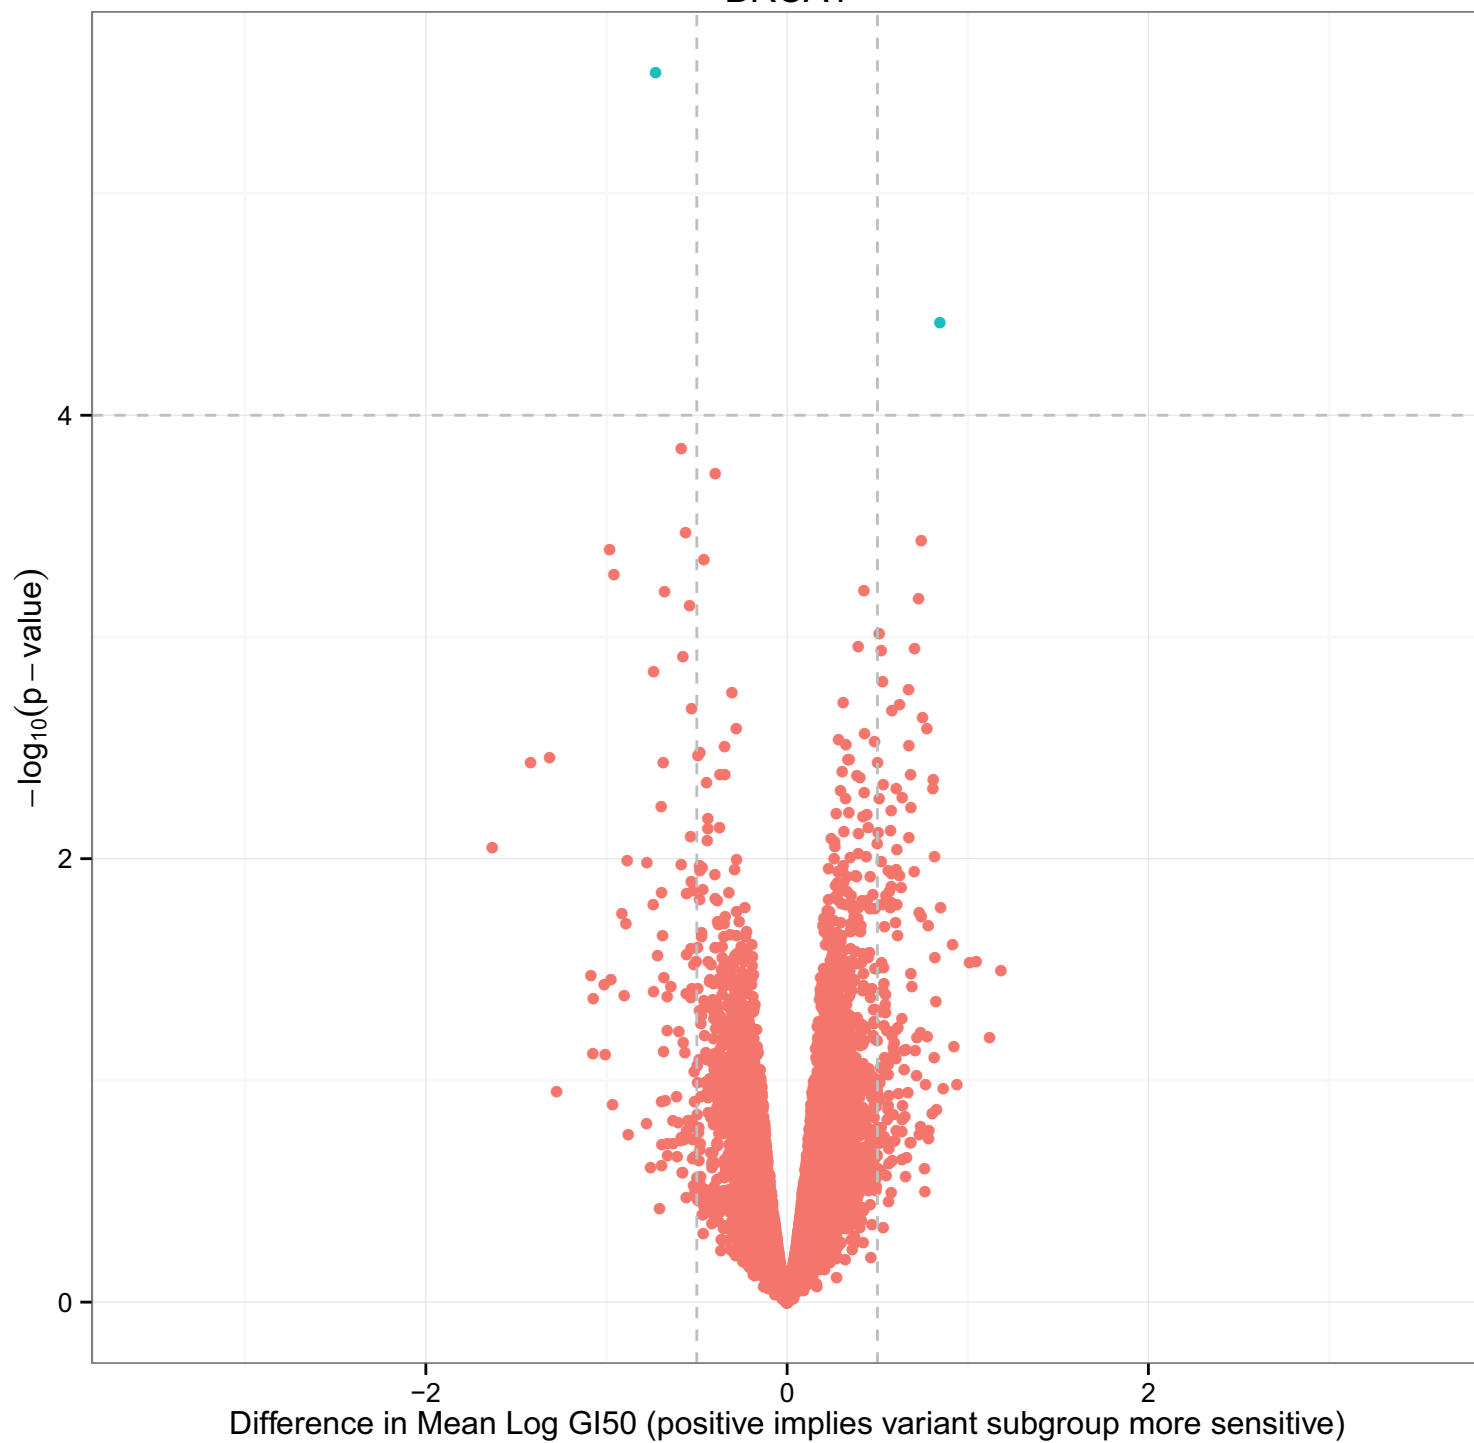

# CARD11

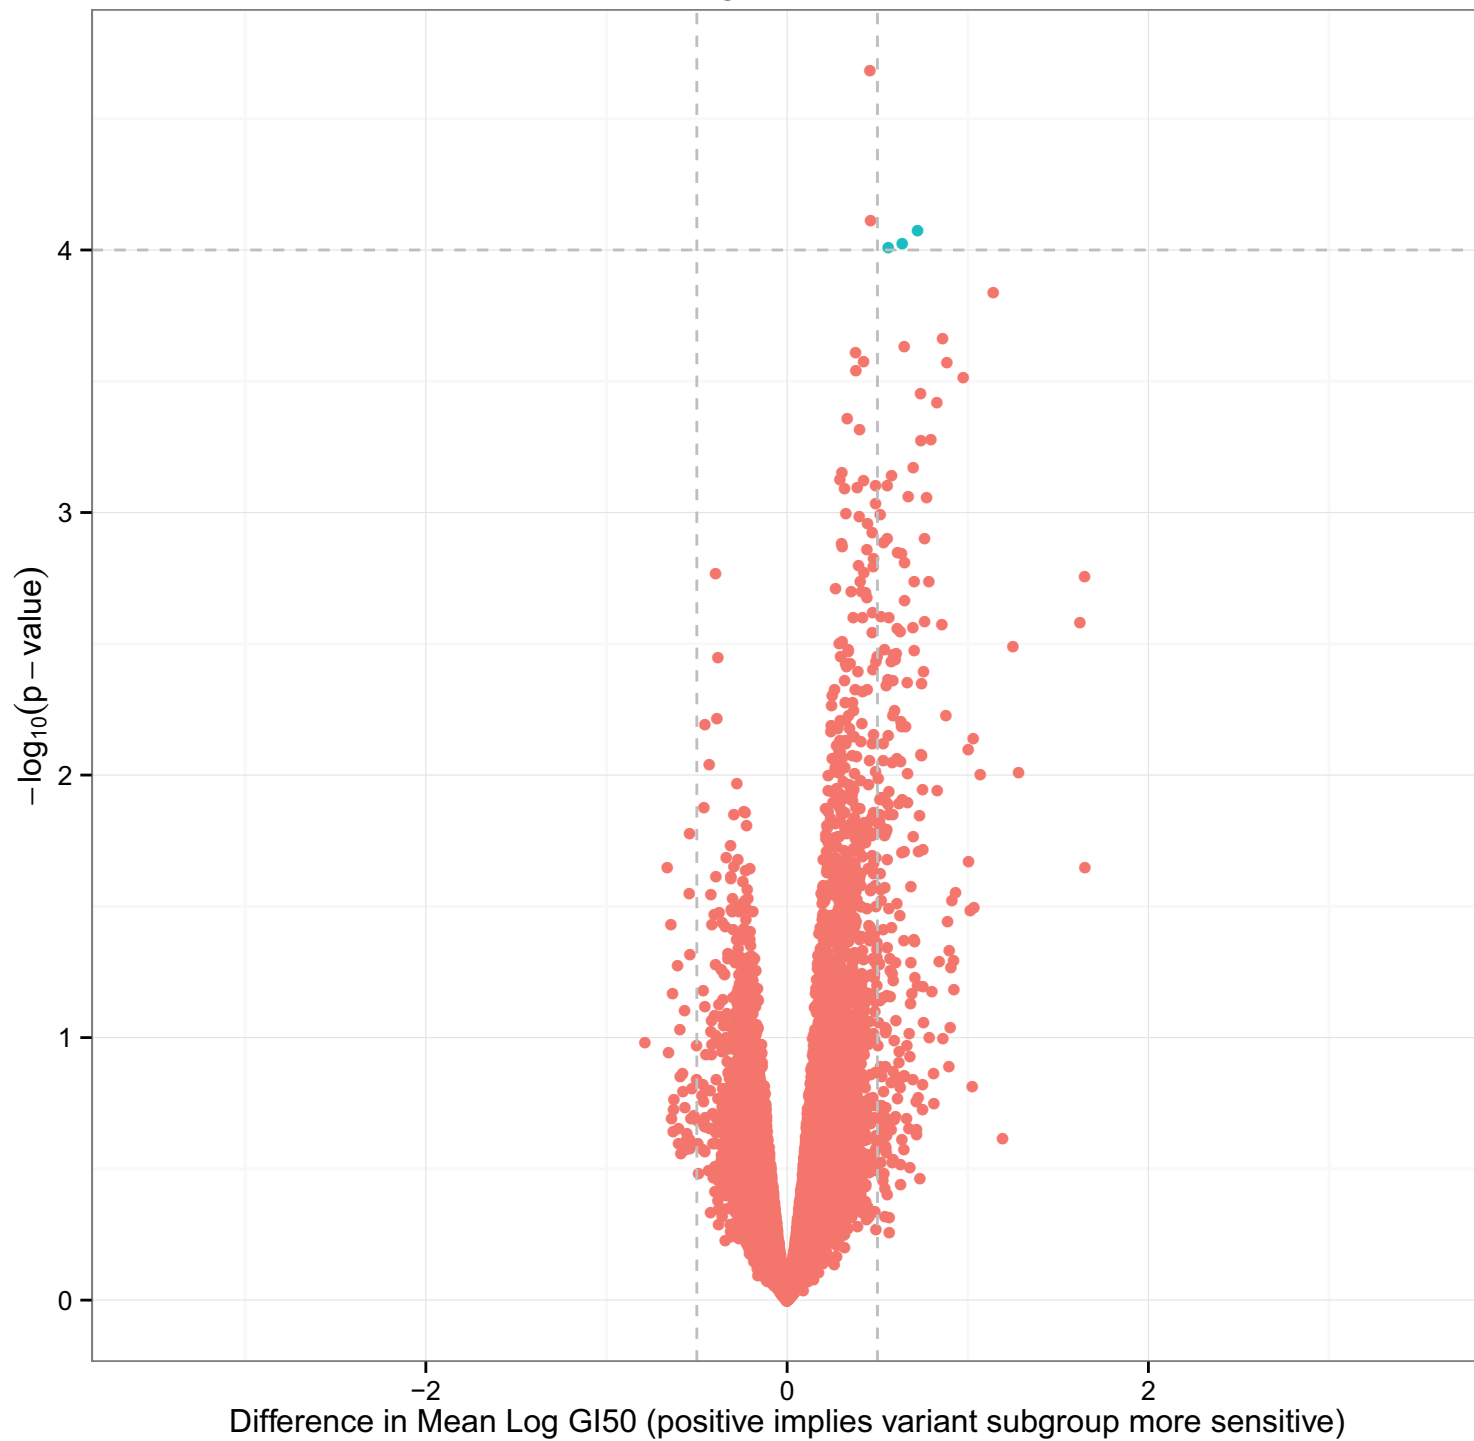



CDH1

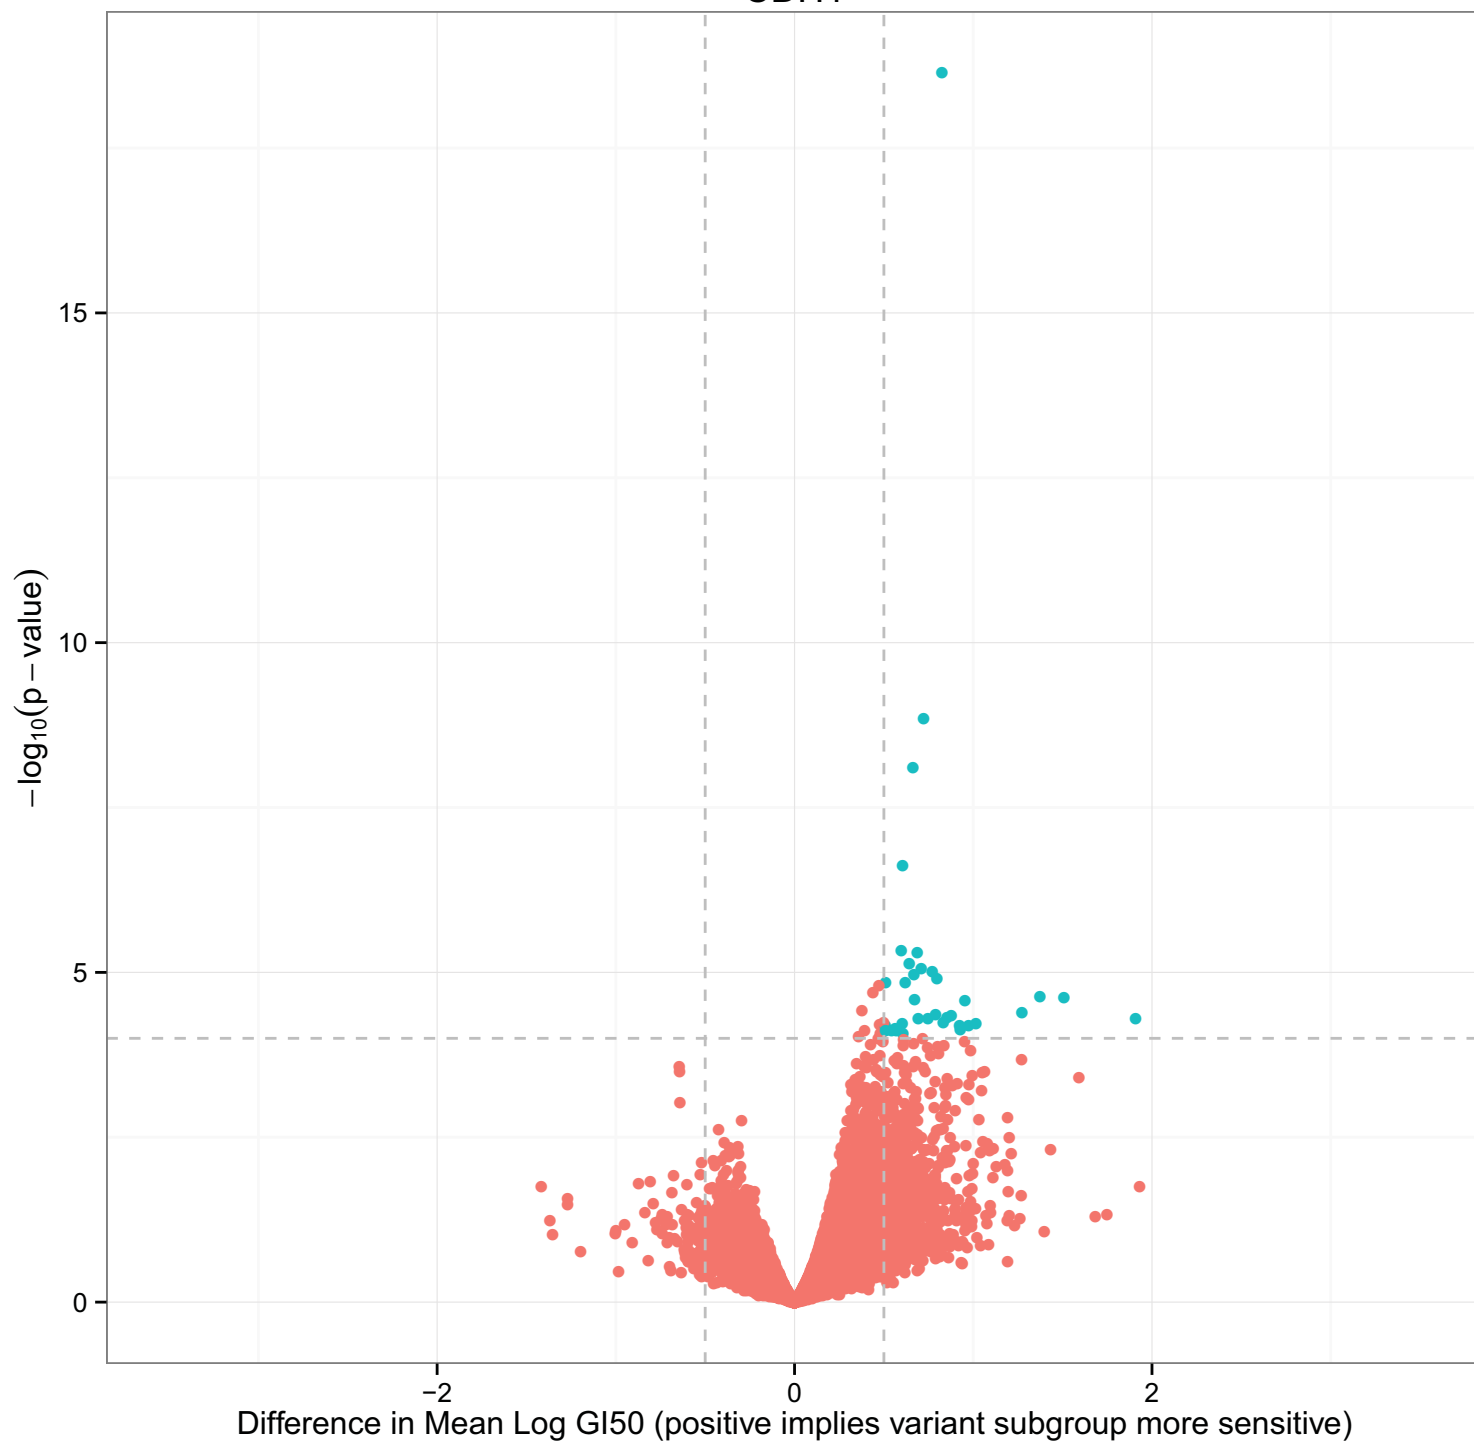

CDH5

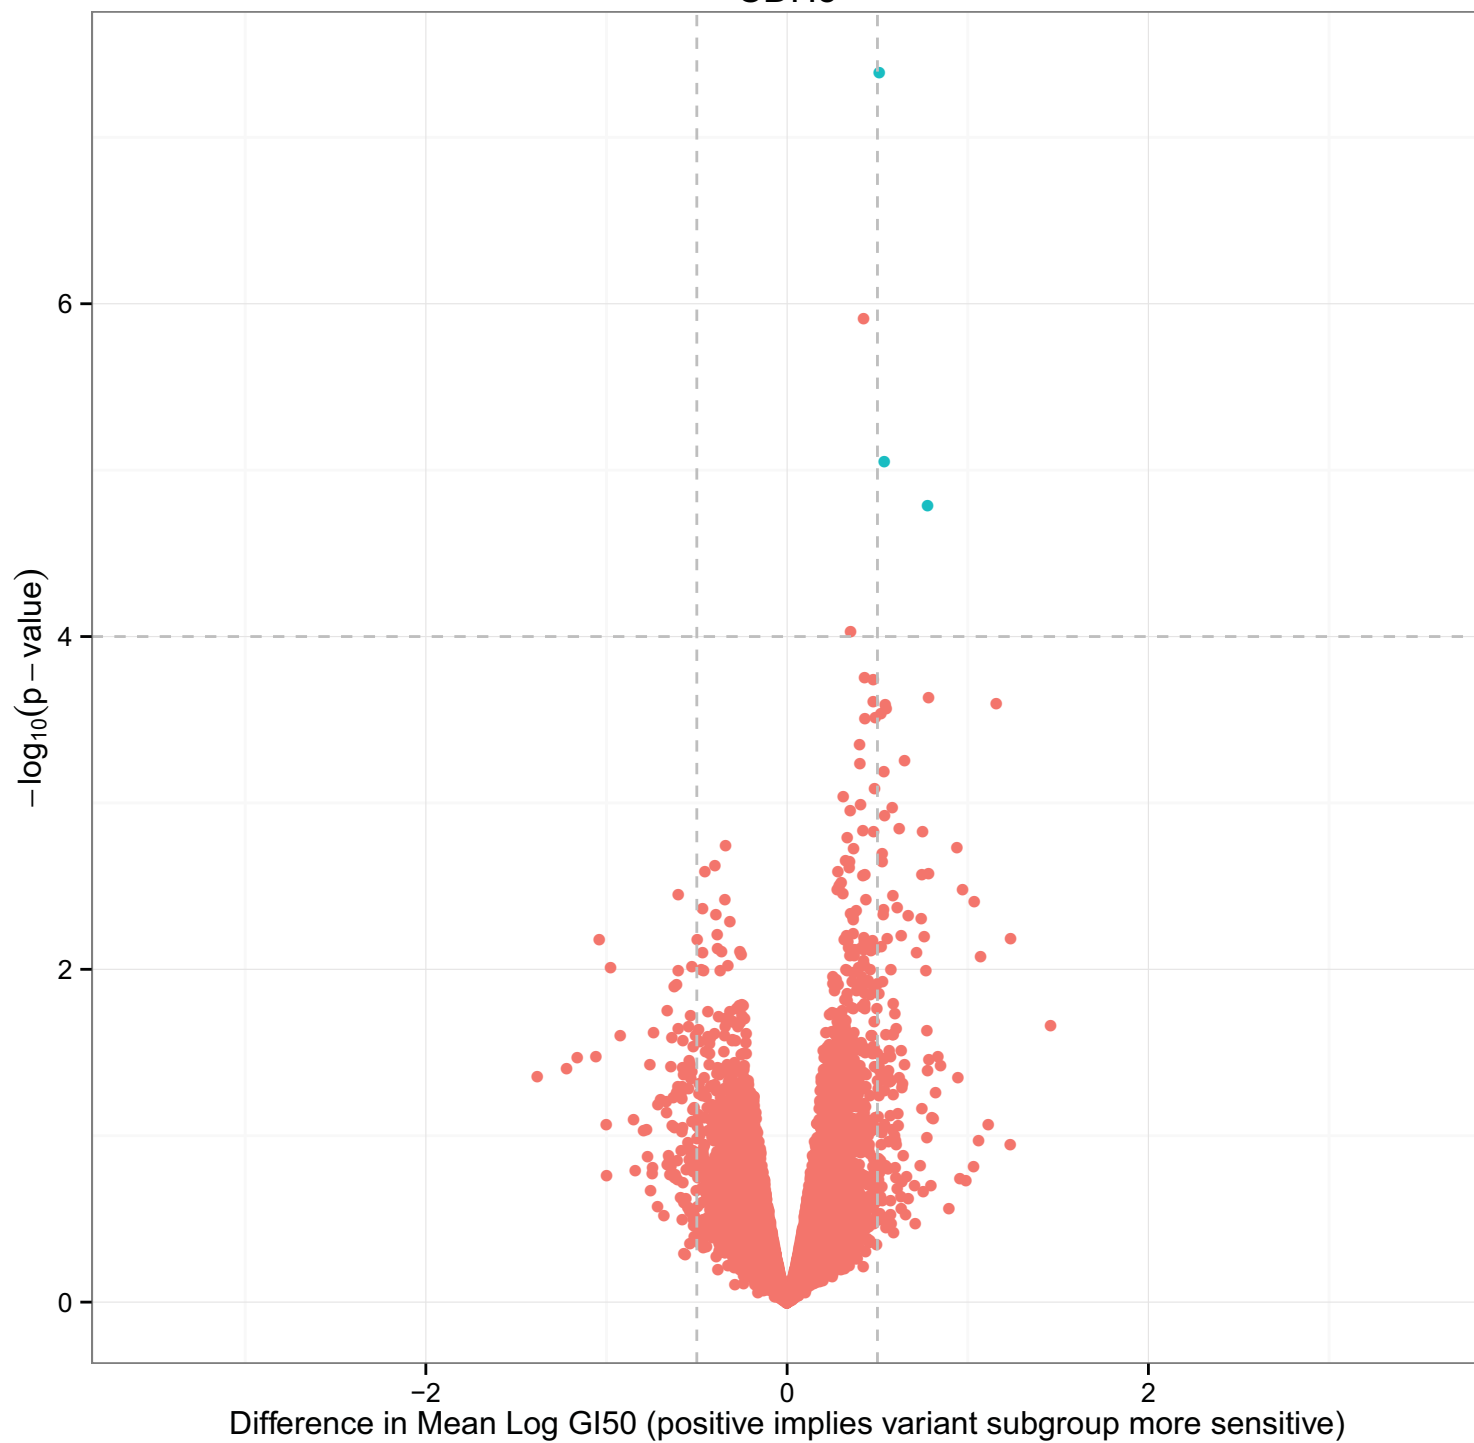

CHD4

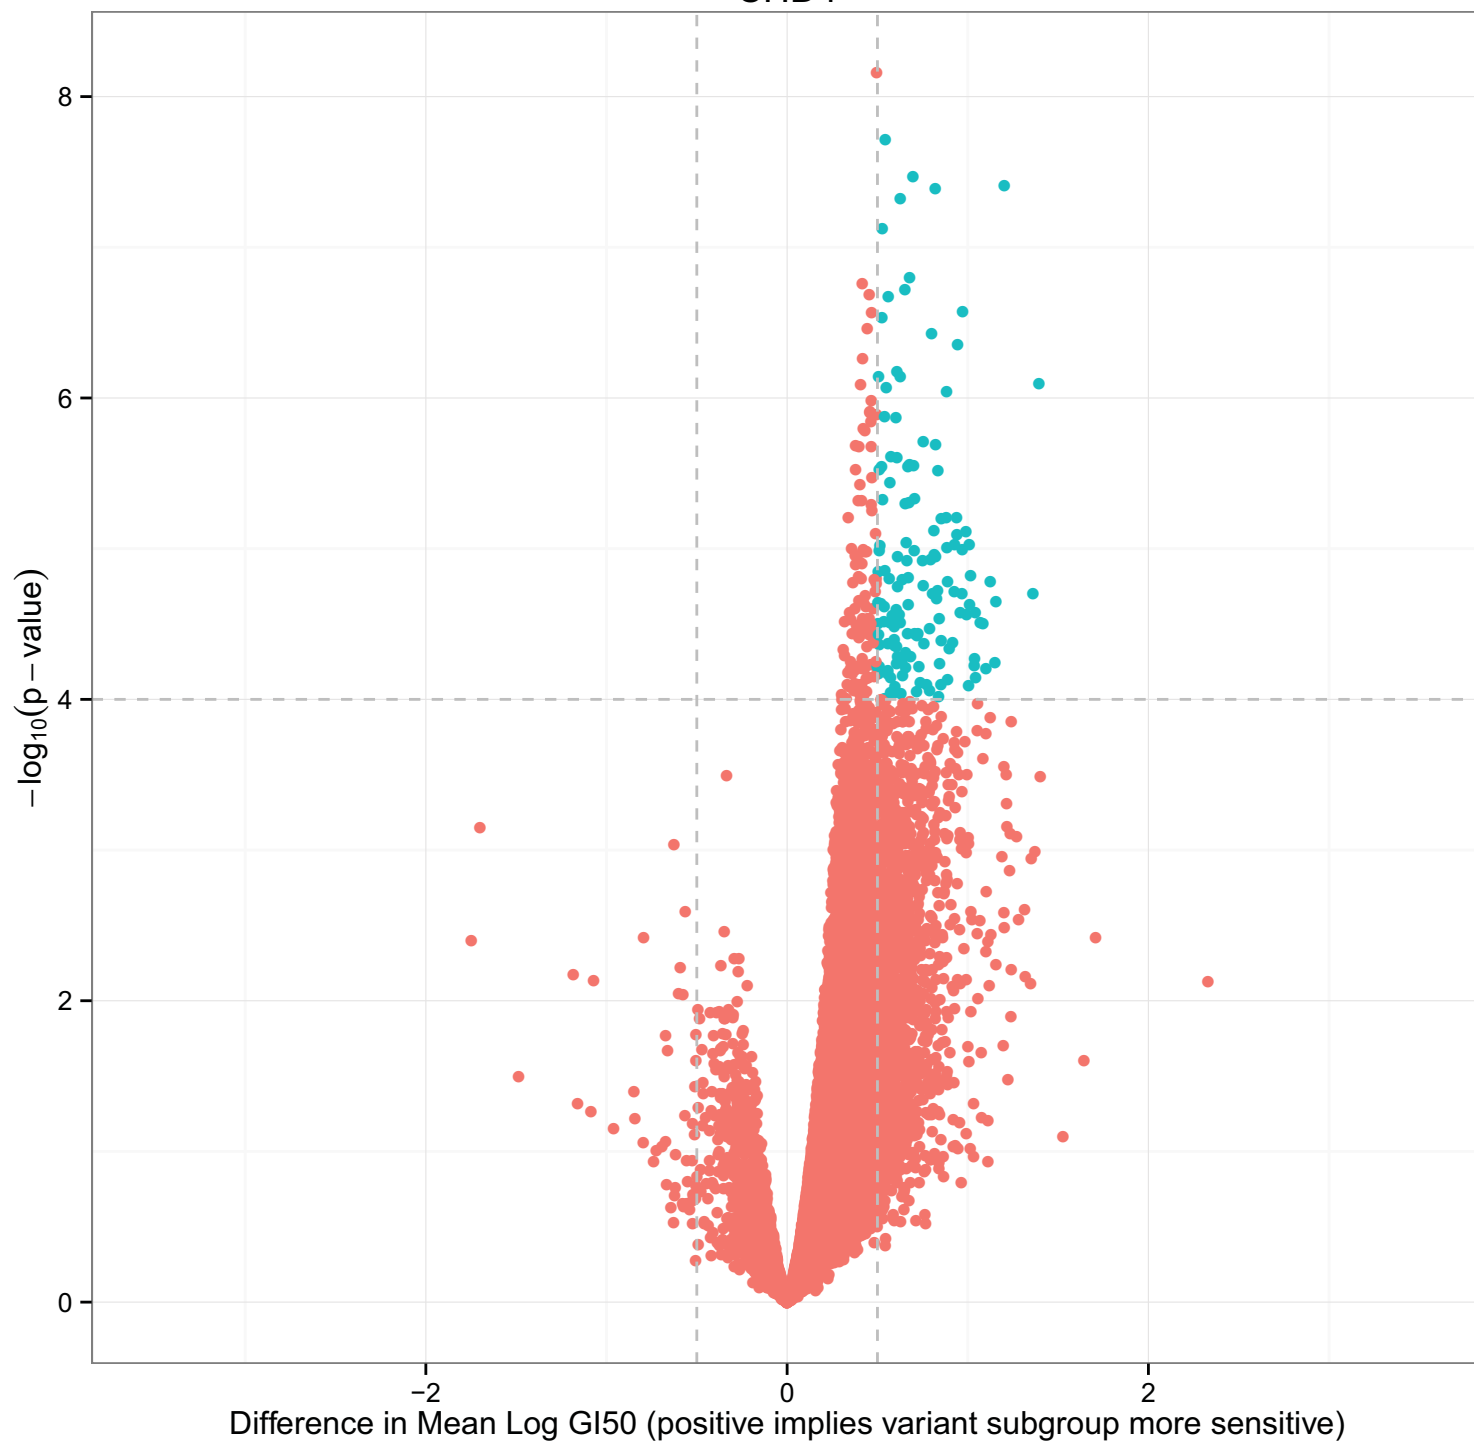

CNTRL

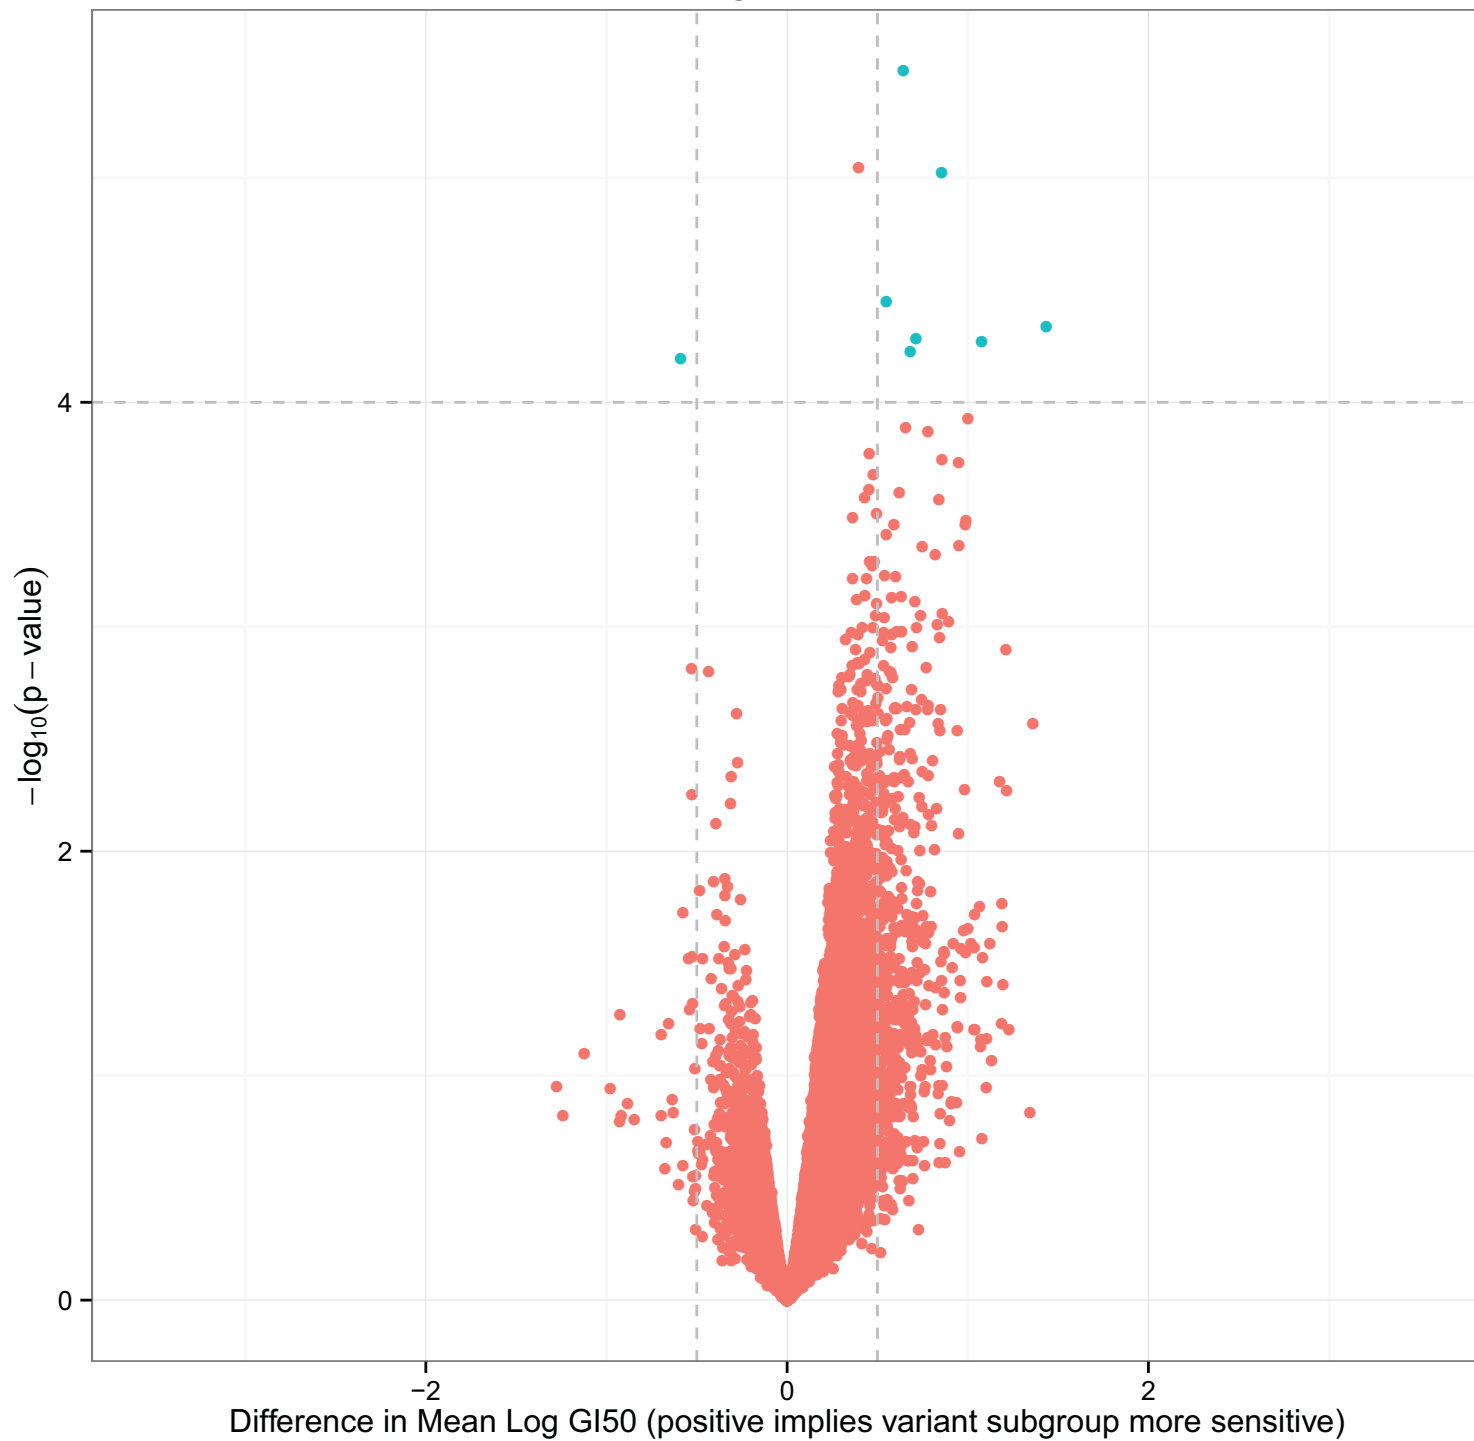

# DNMT3A

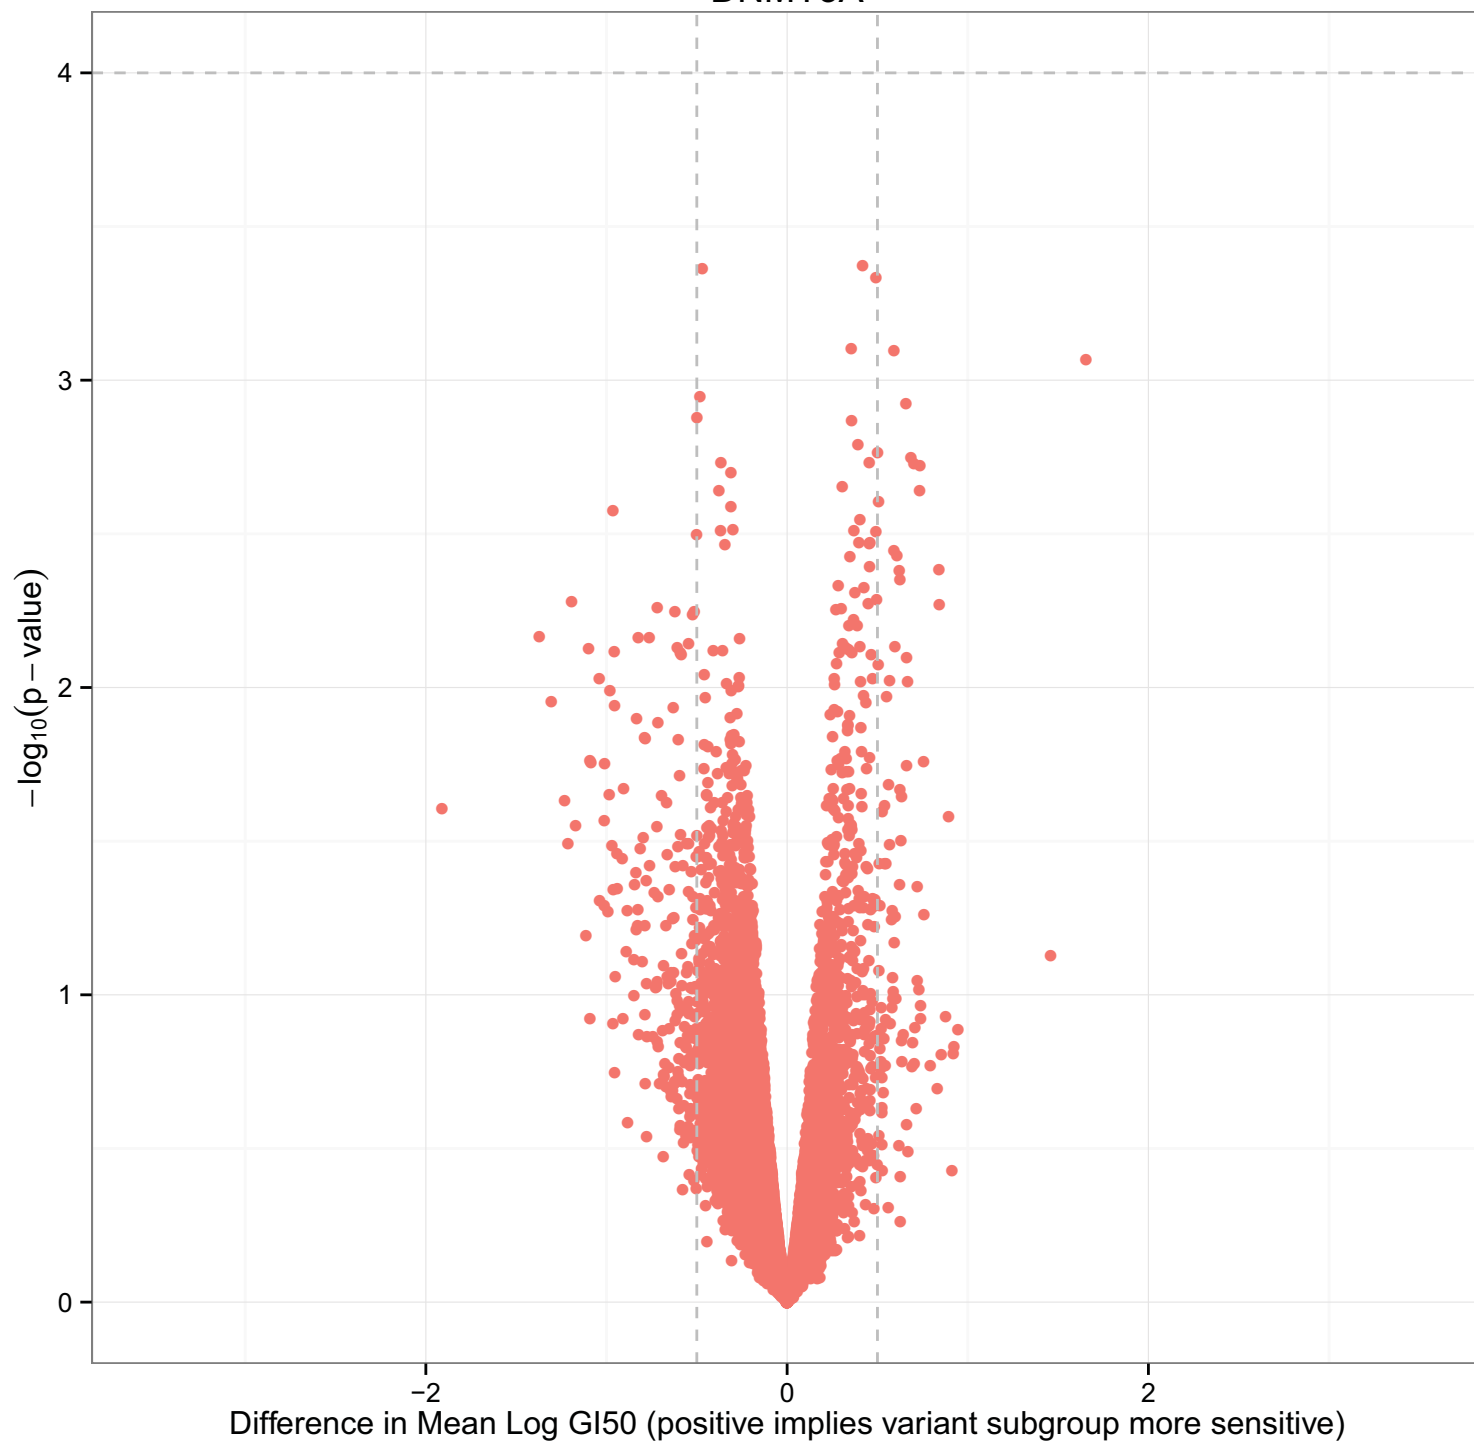

DST

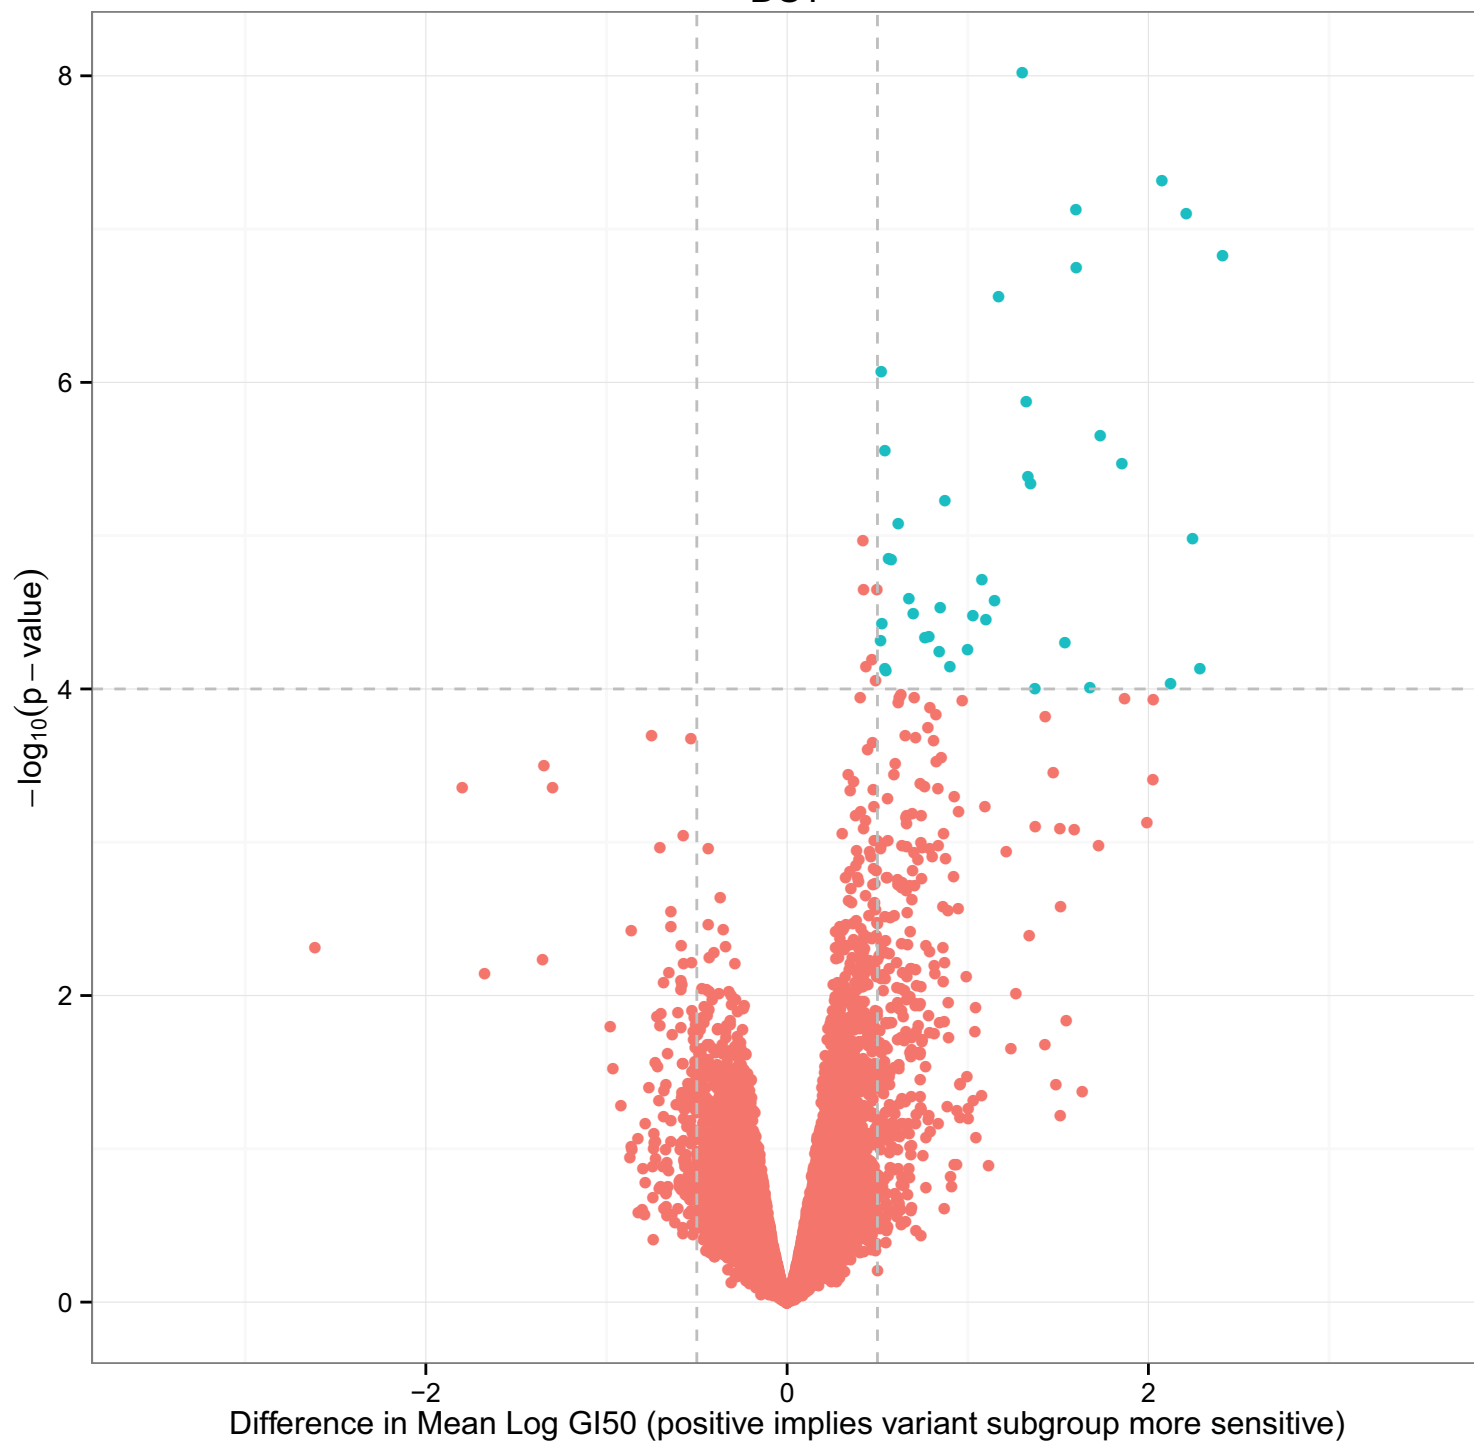

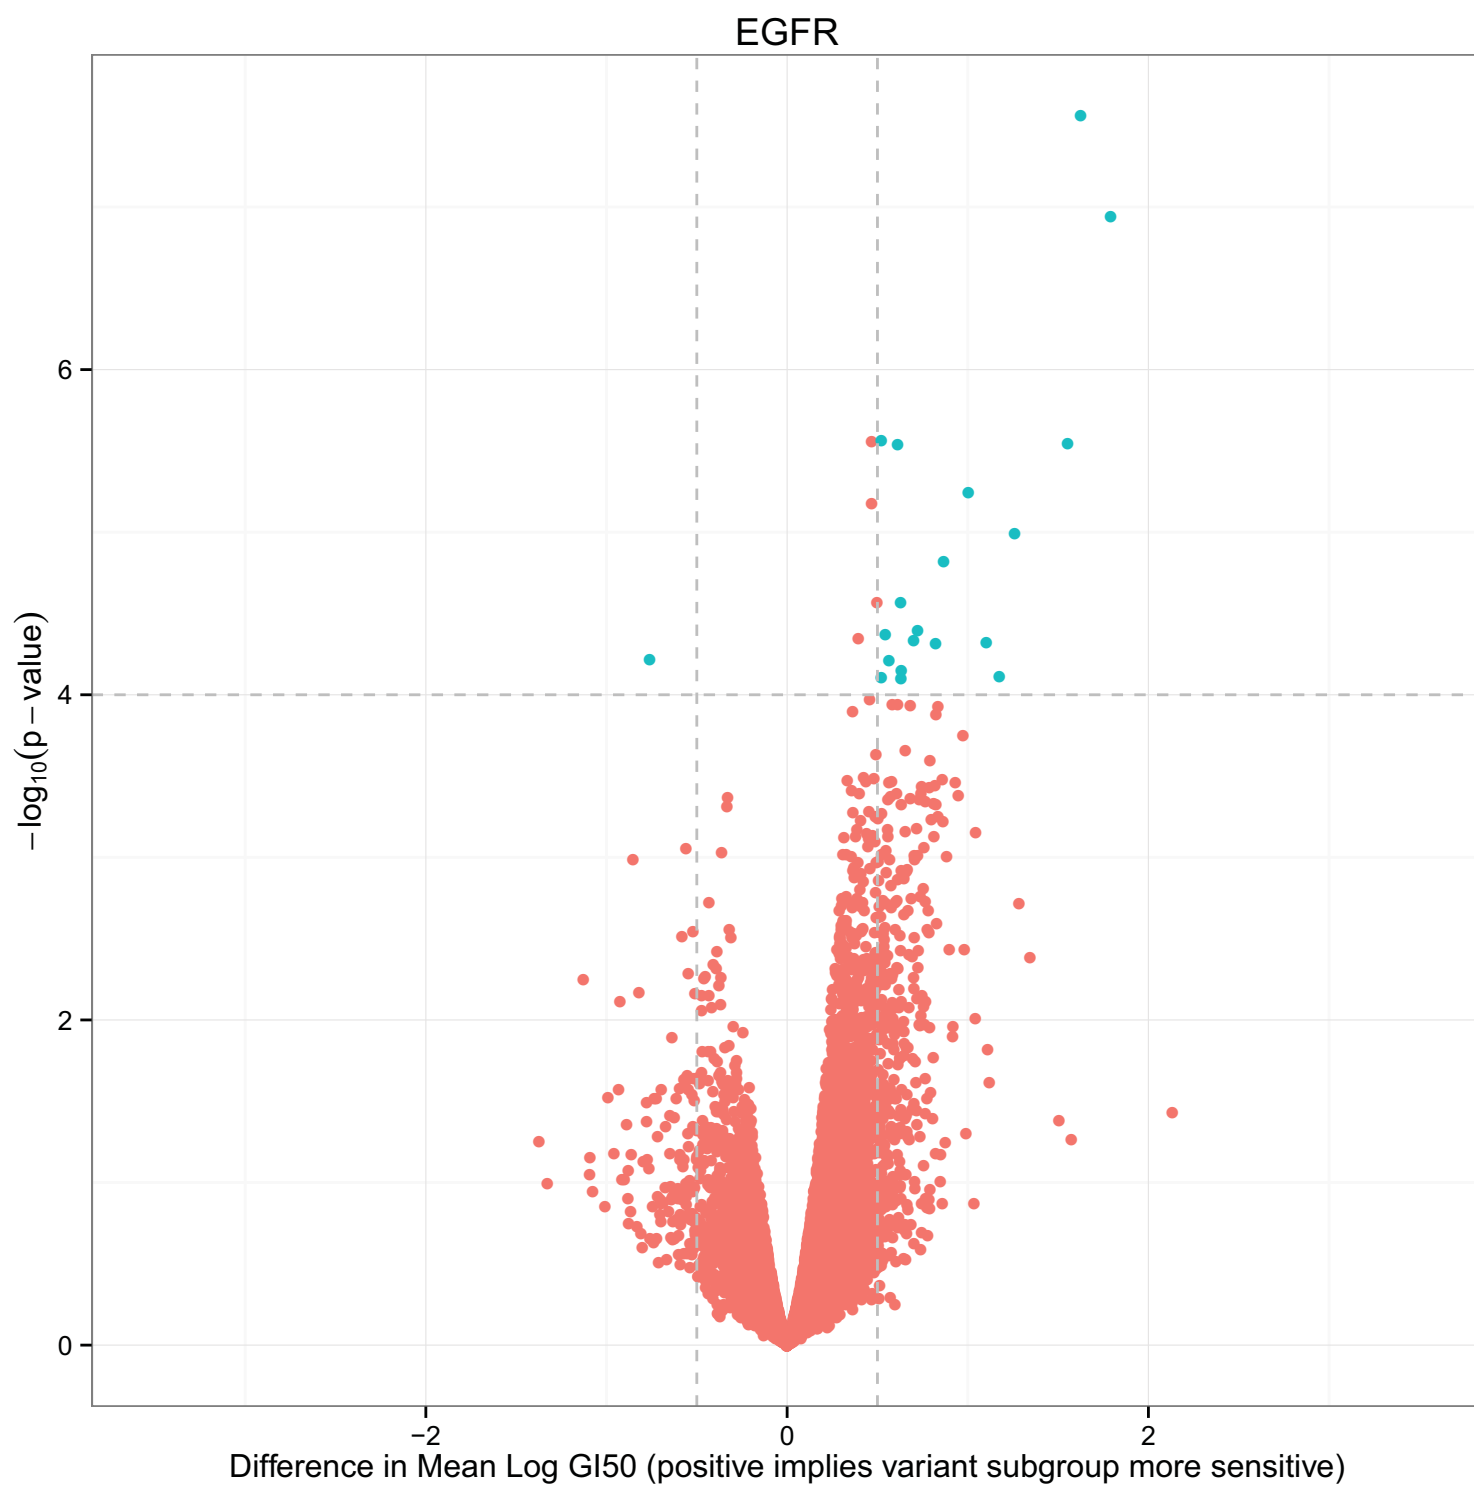

# EPHA3

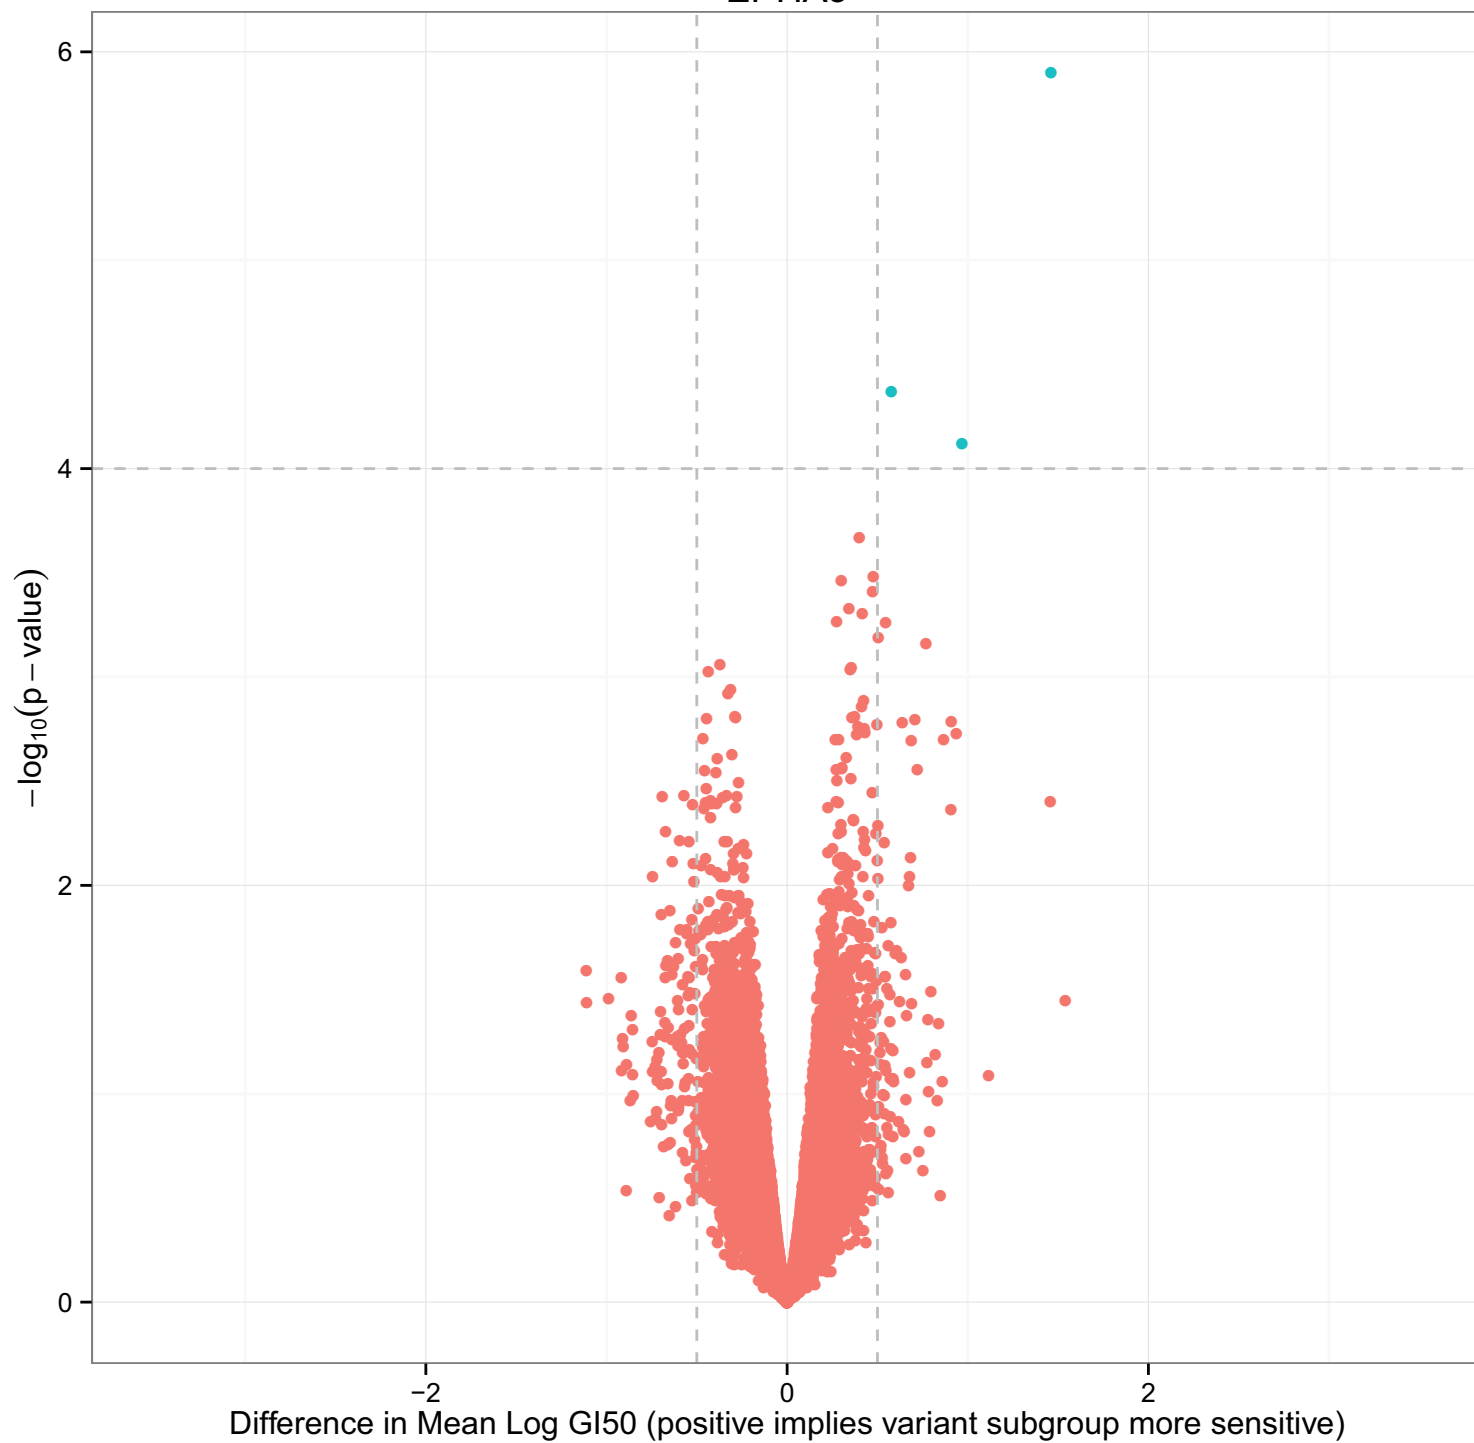



# EPHA5

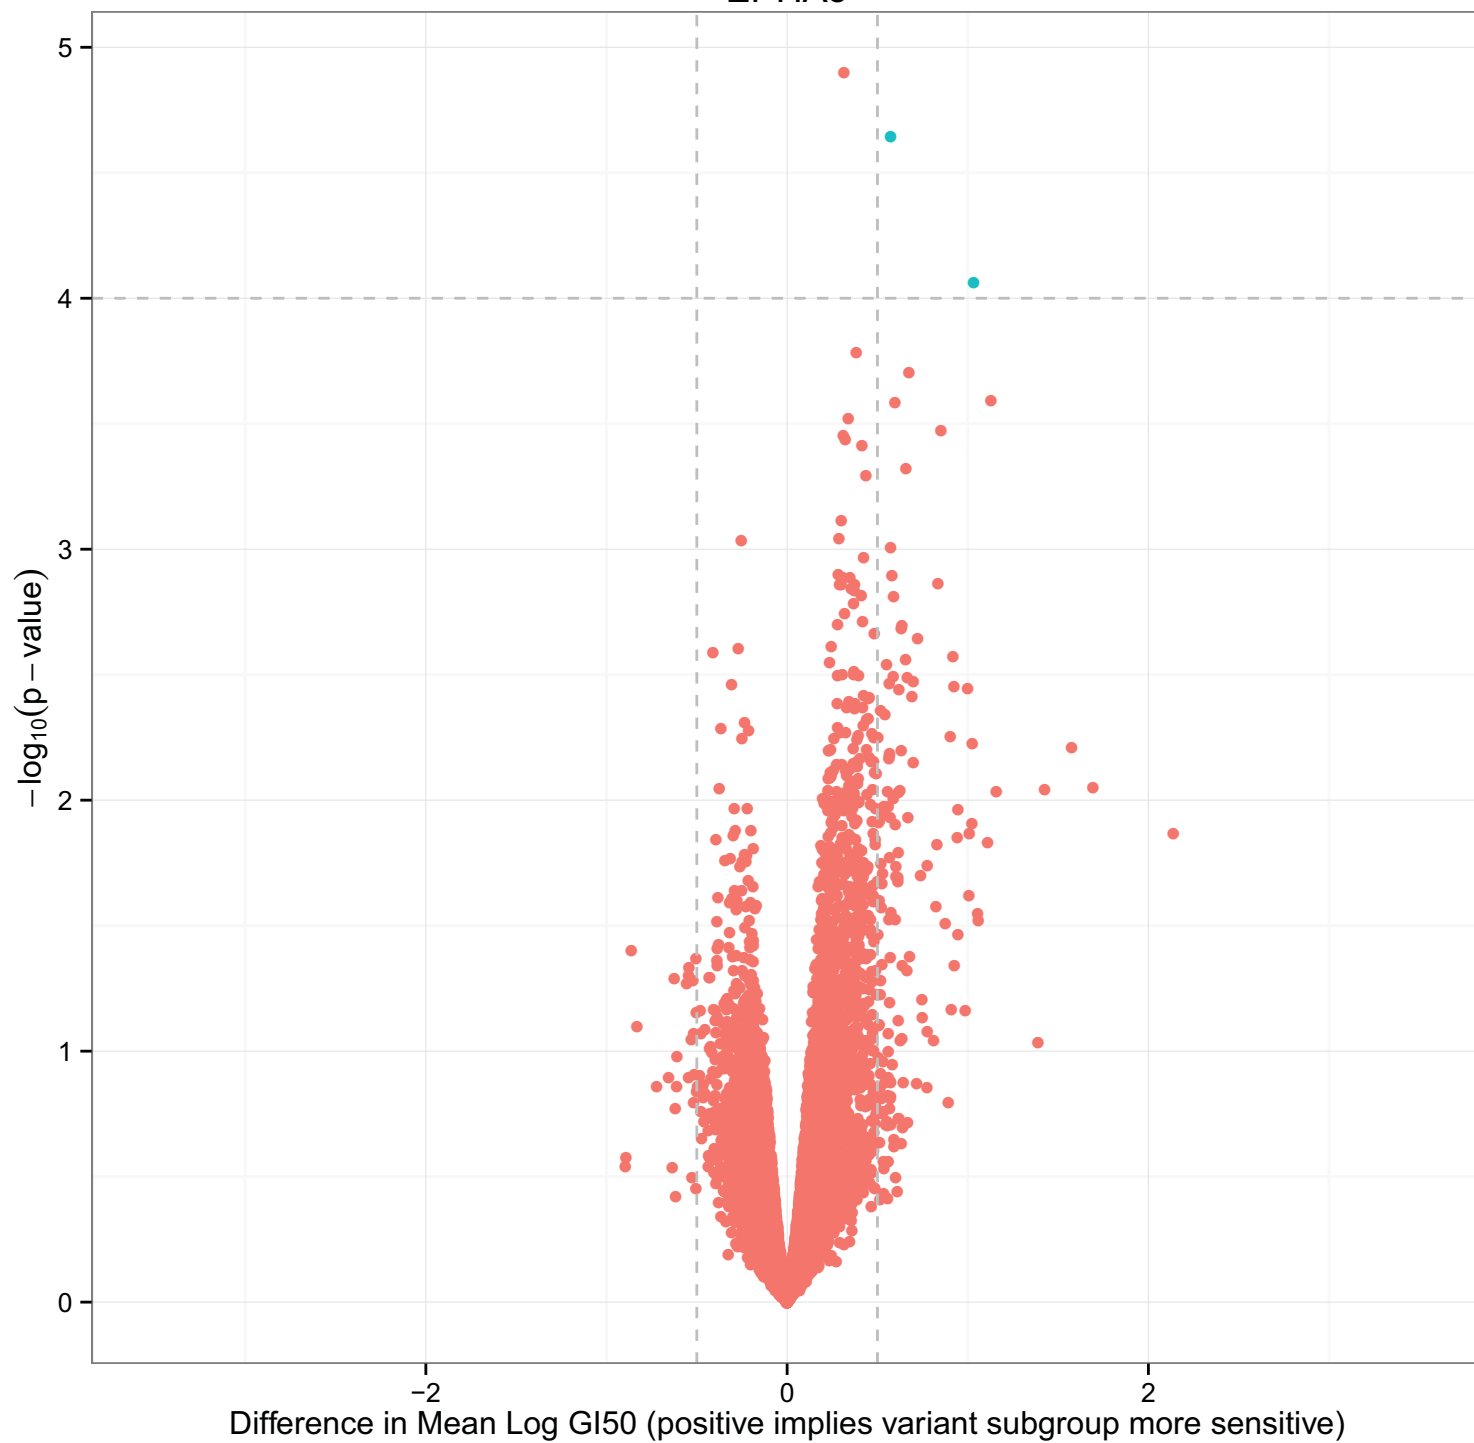

# ERBB4

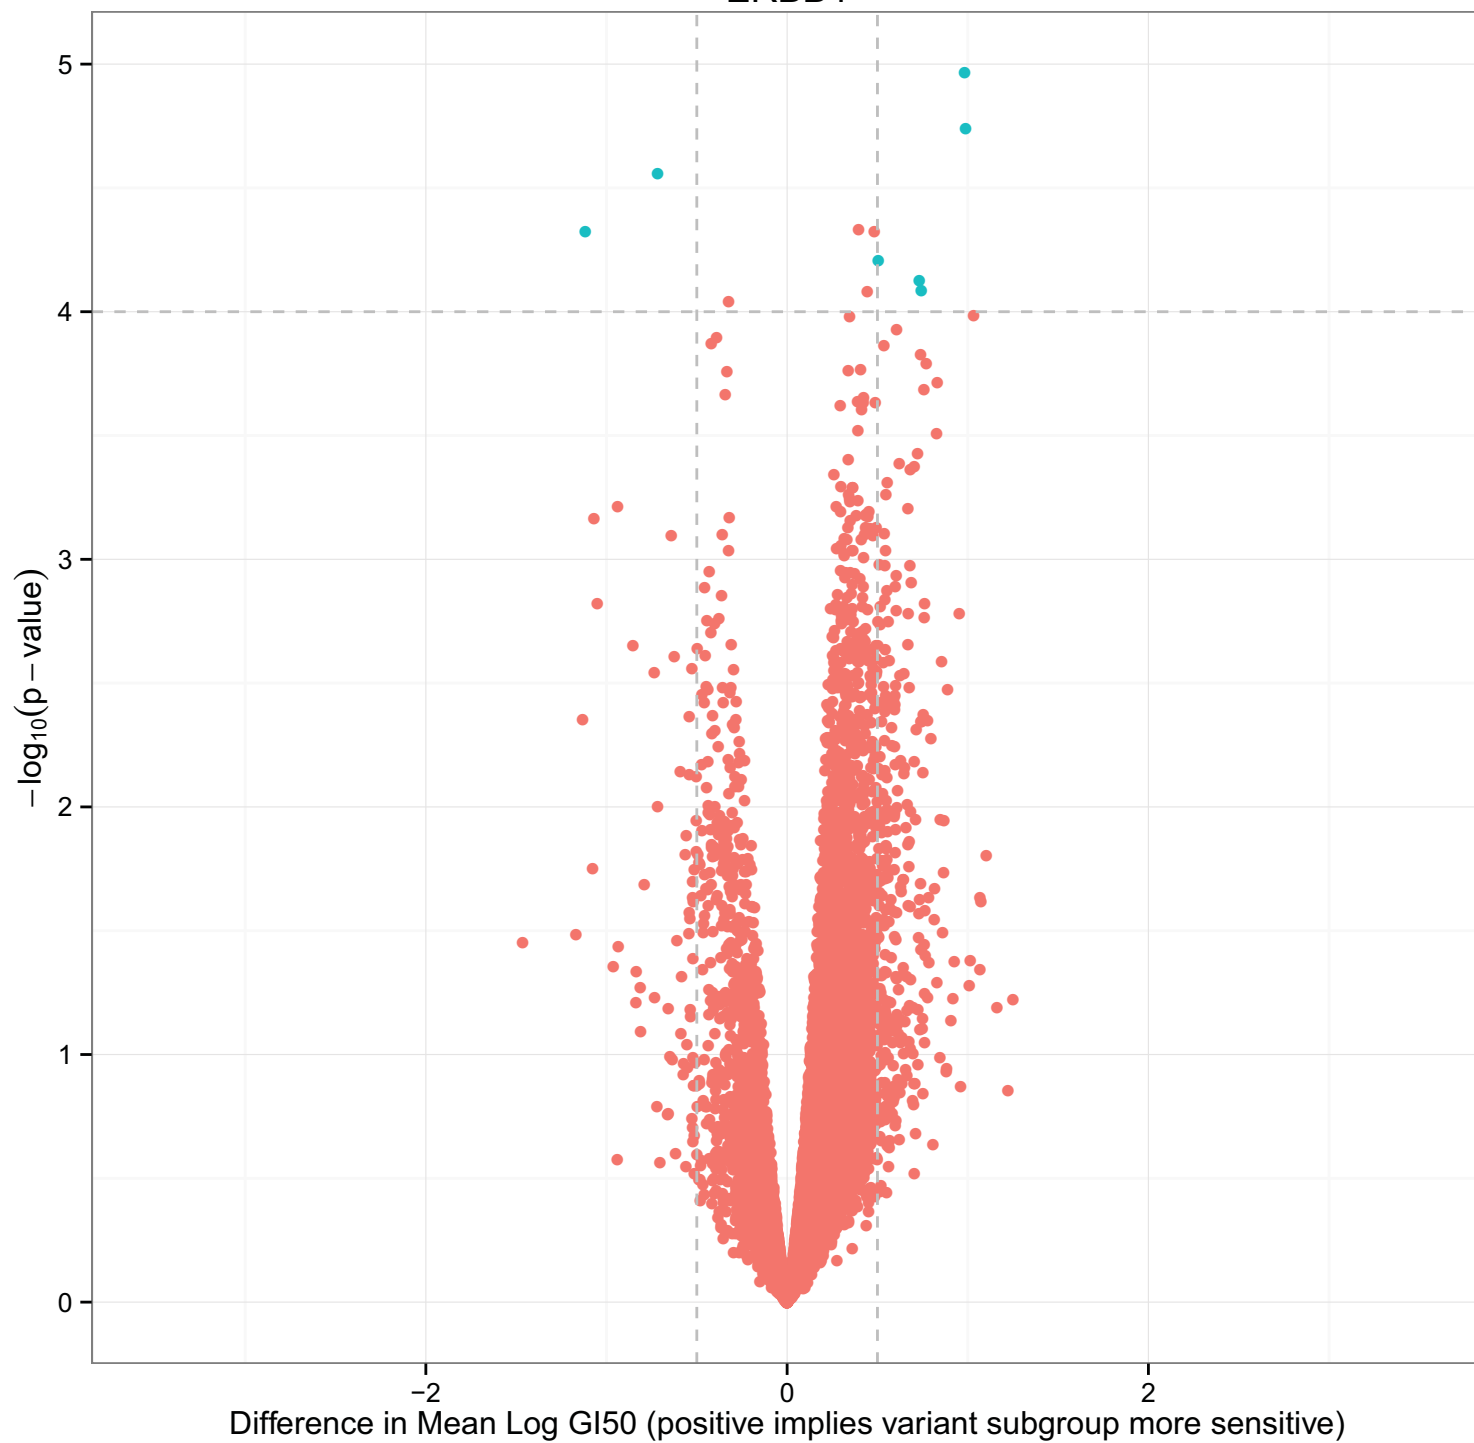

FLT1

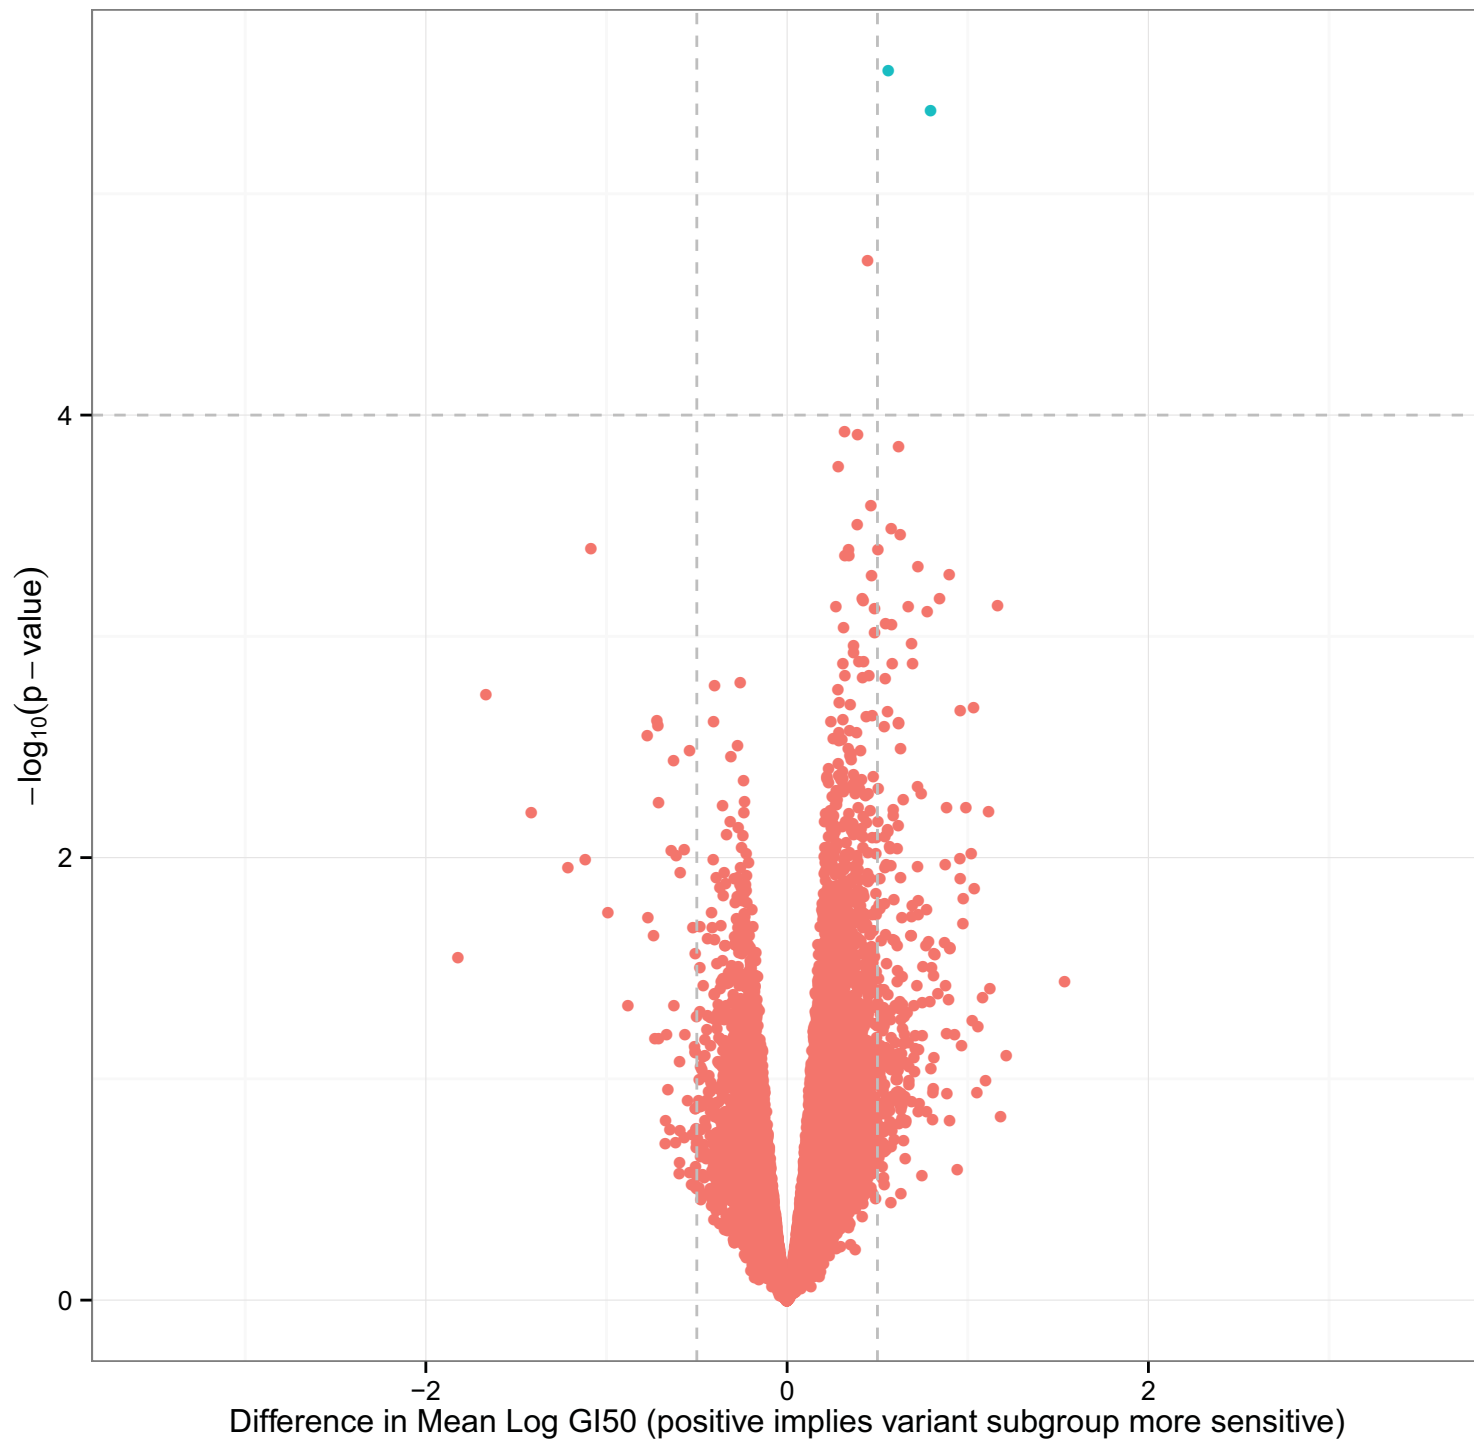

FLT3

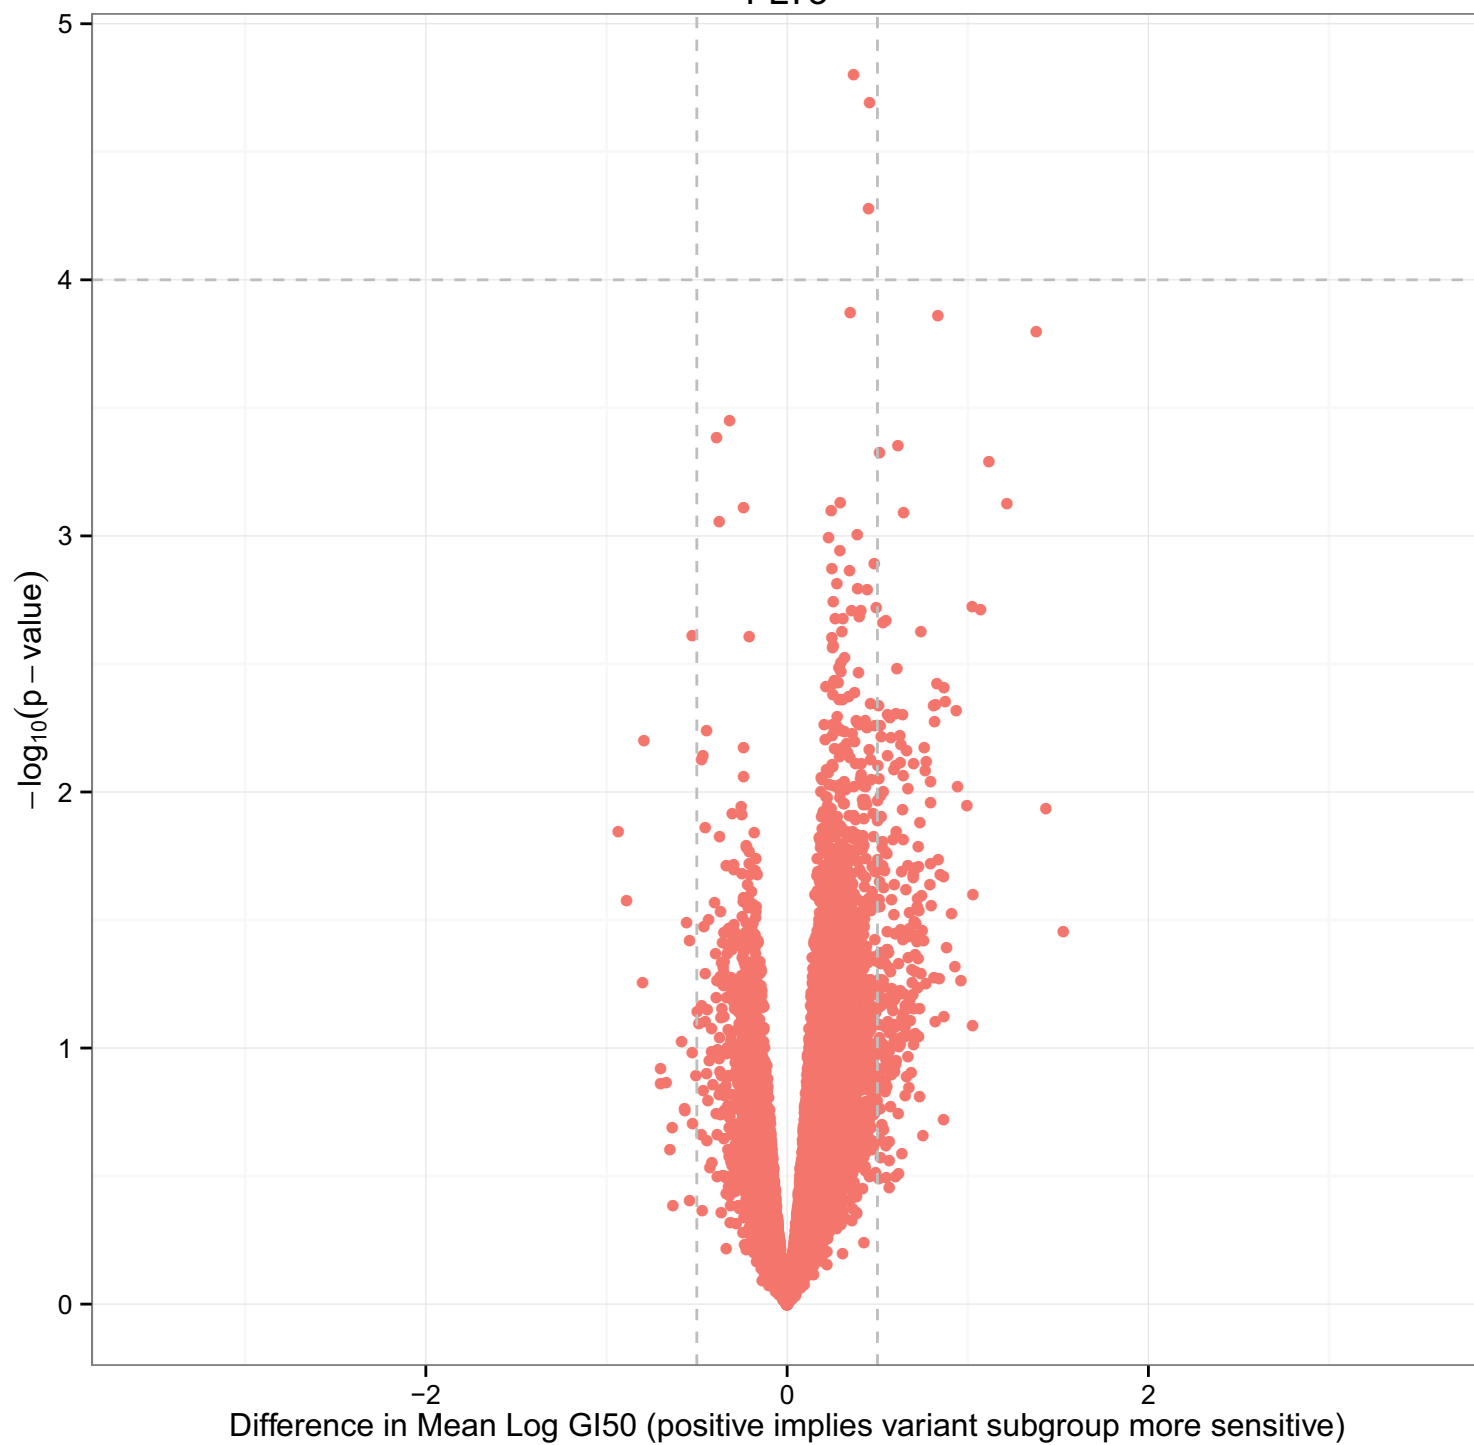

GNAS

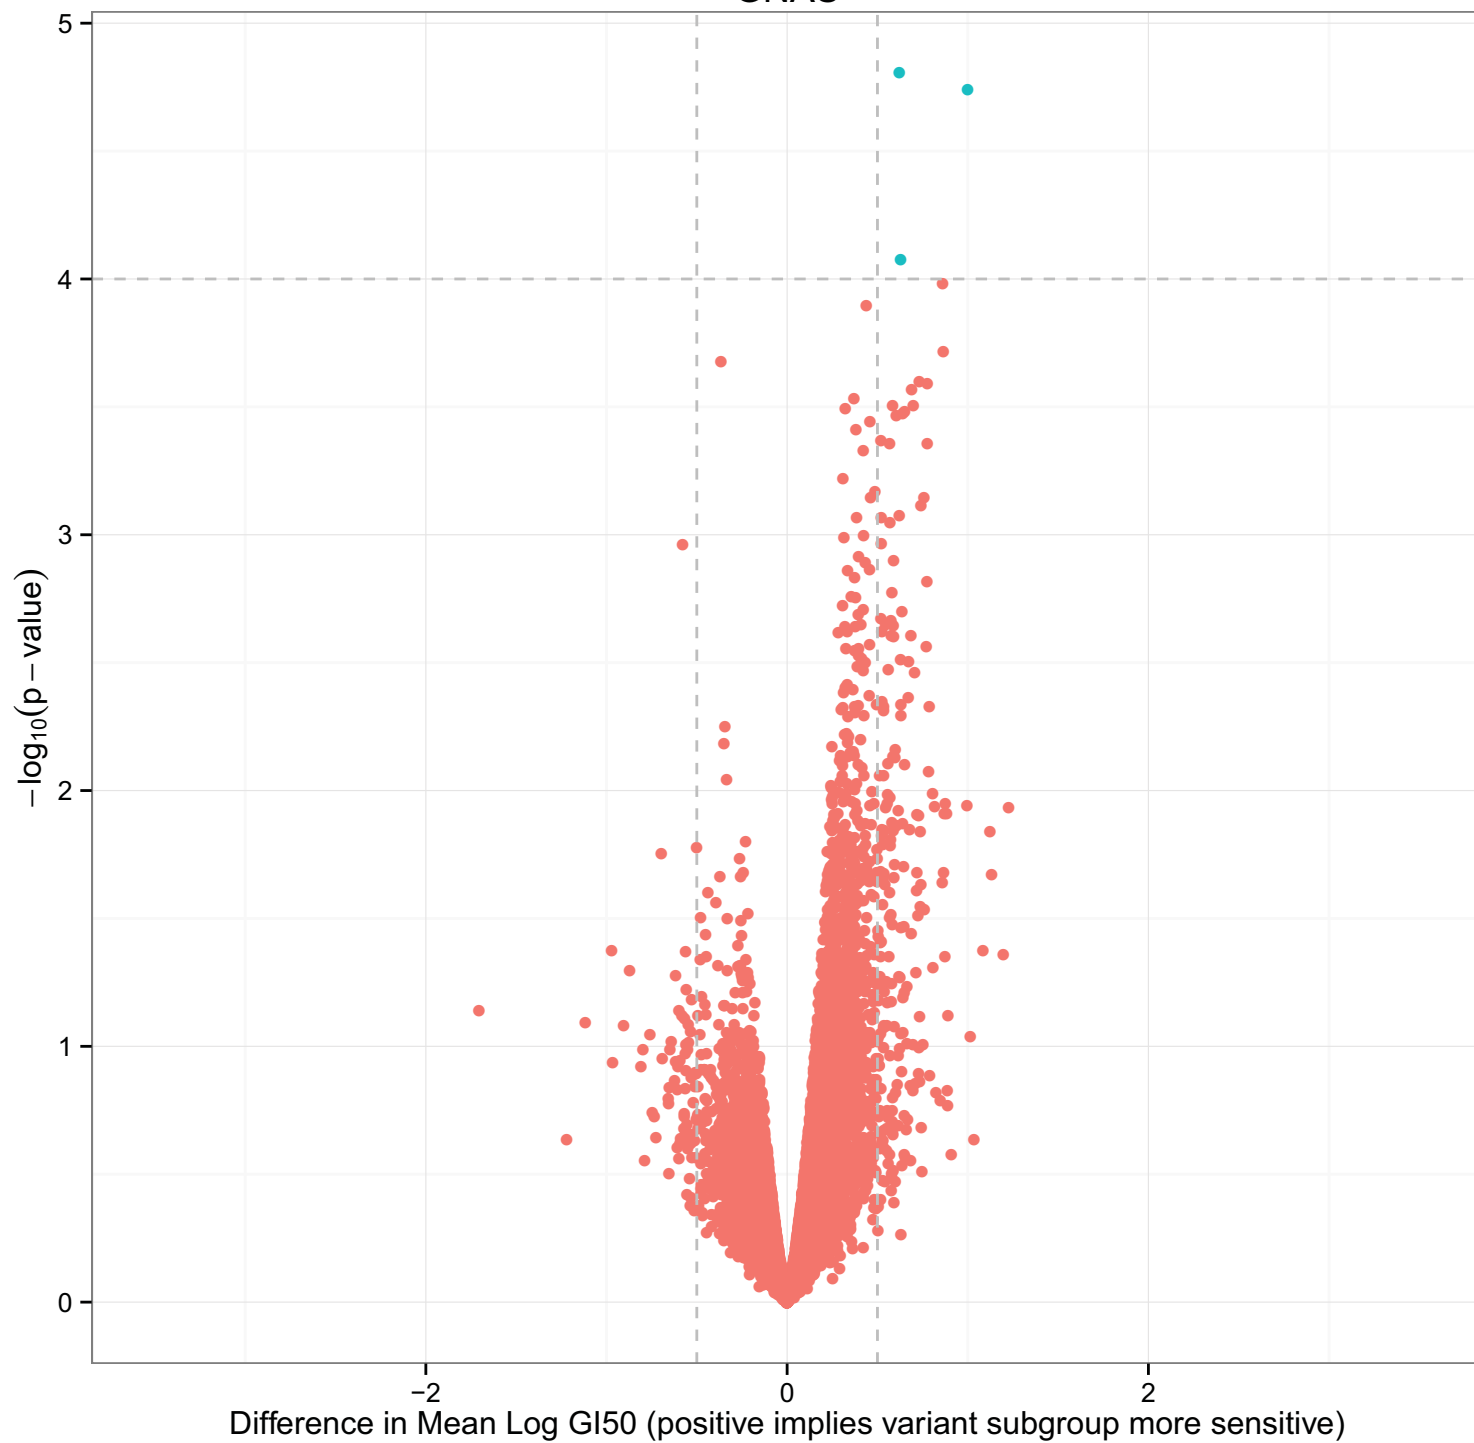

# GRIN2A

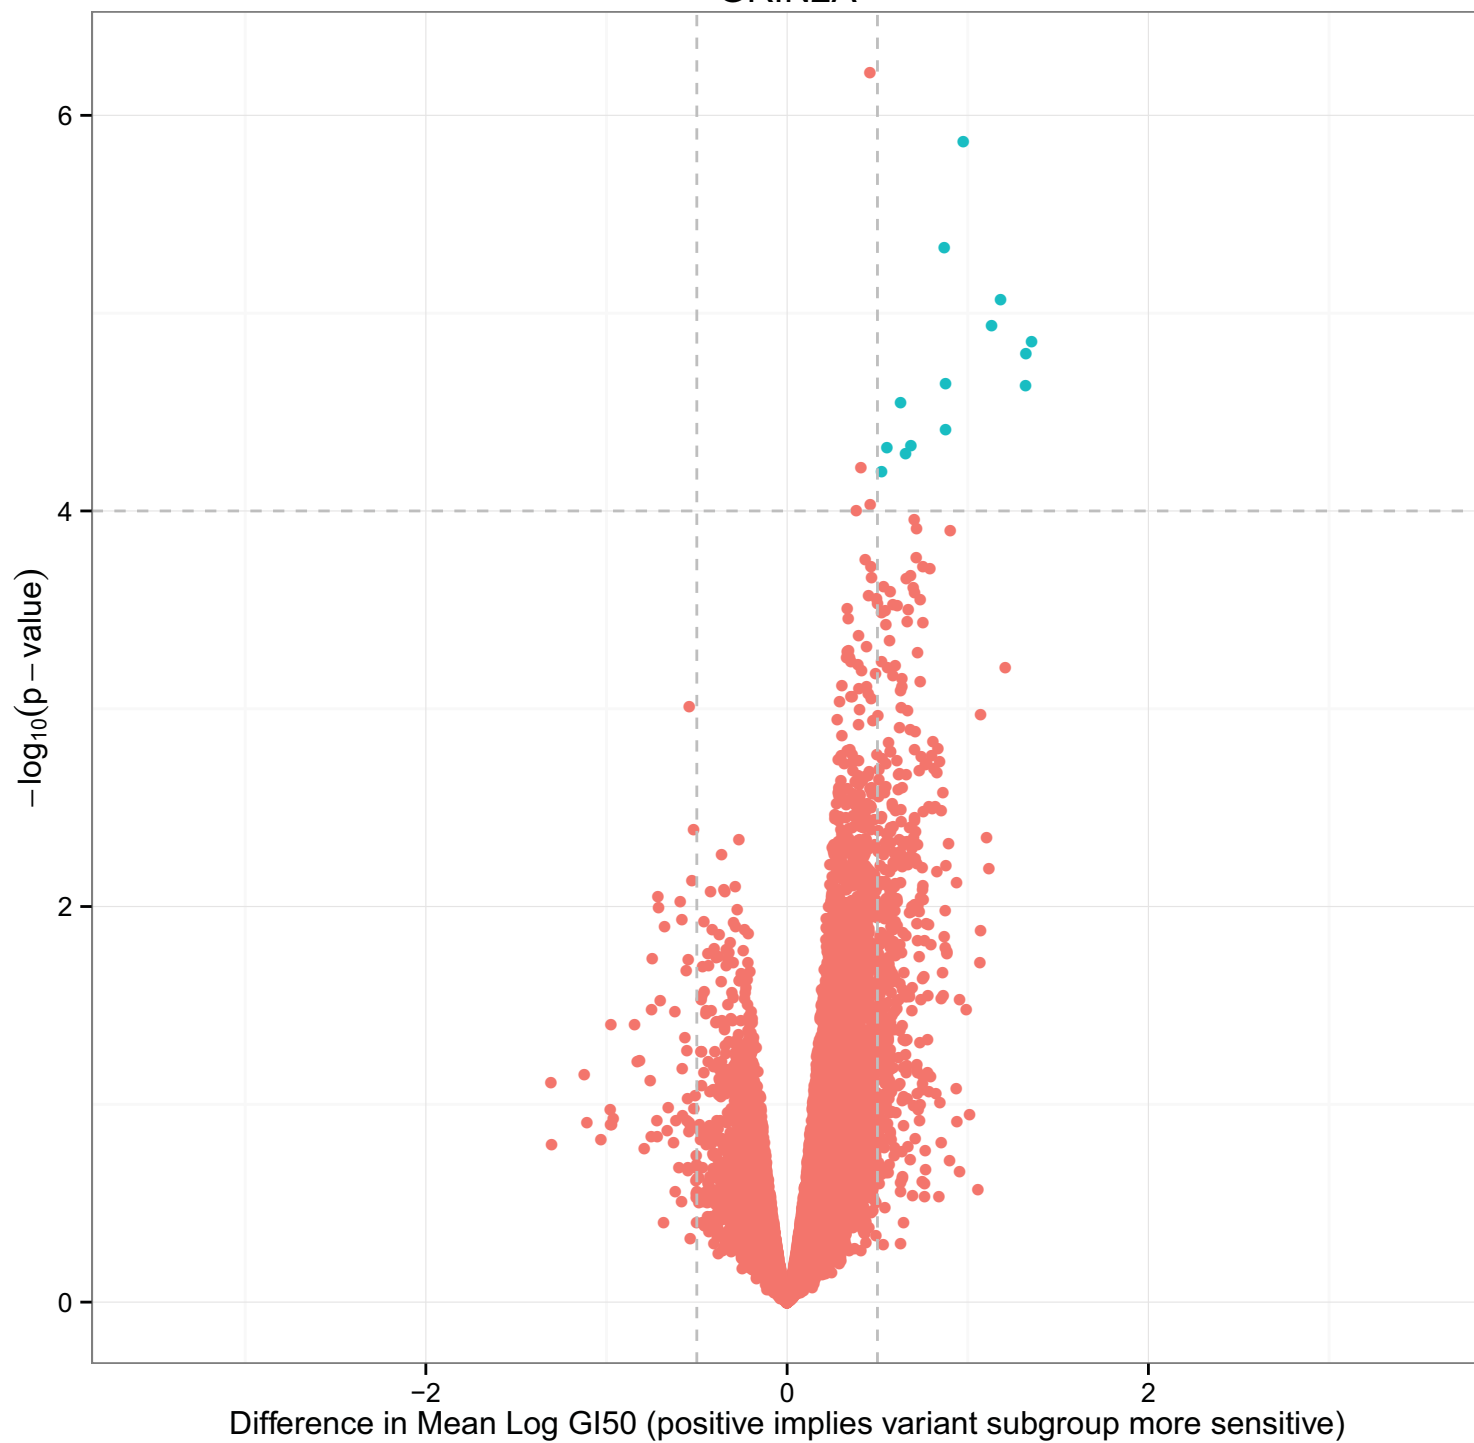

# GUCY1A2

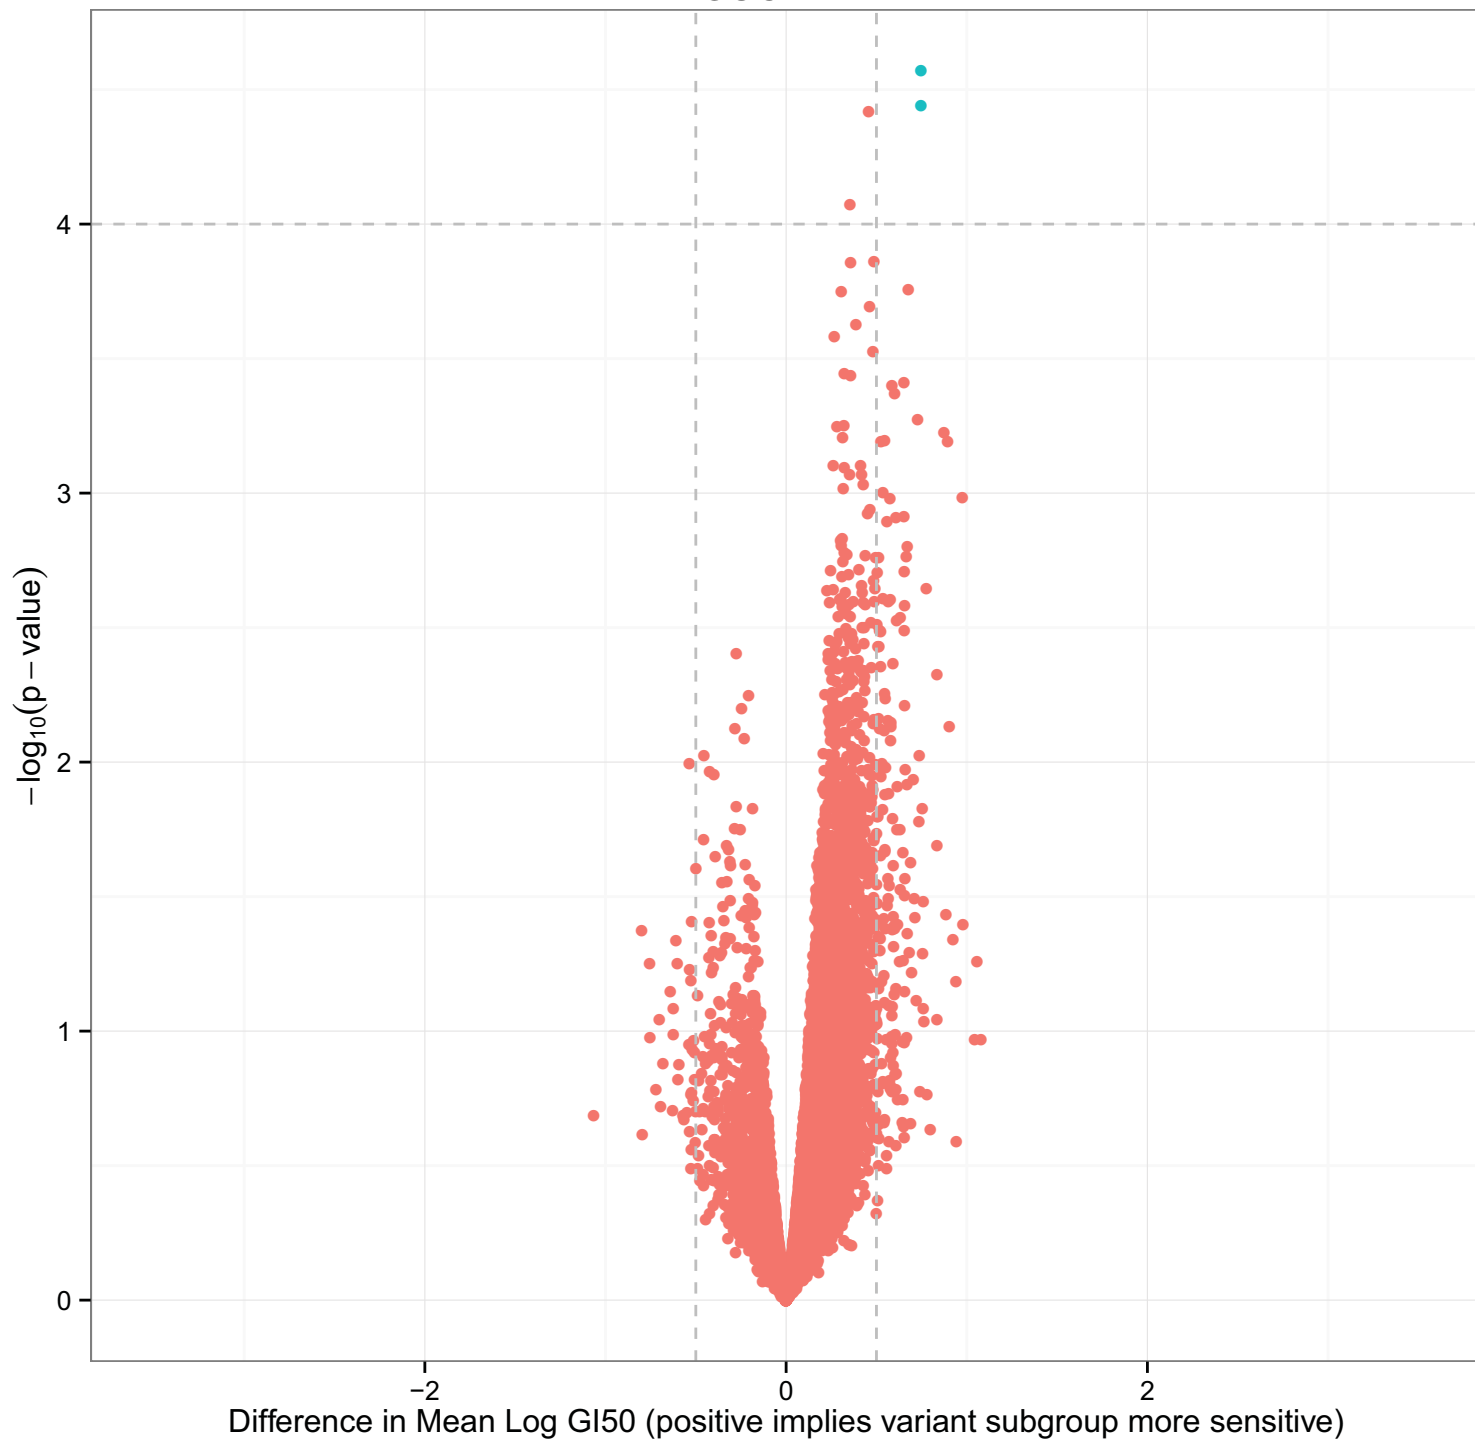

# IGF1R

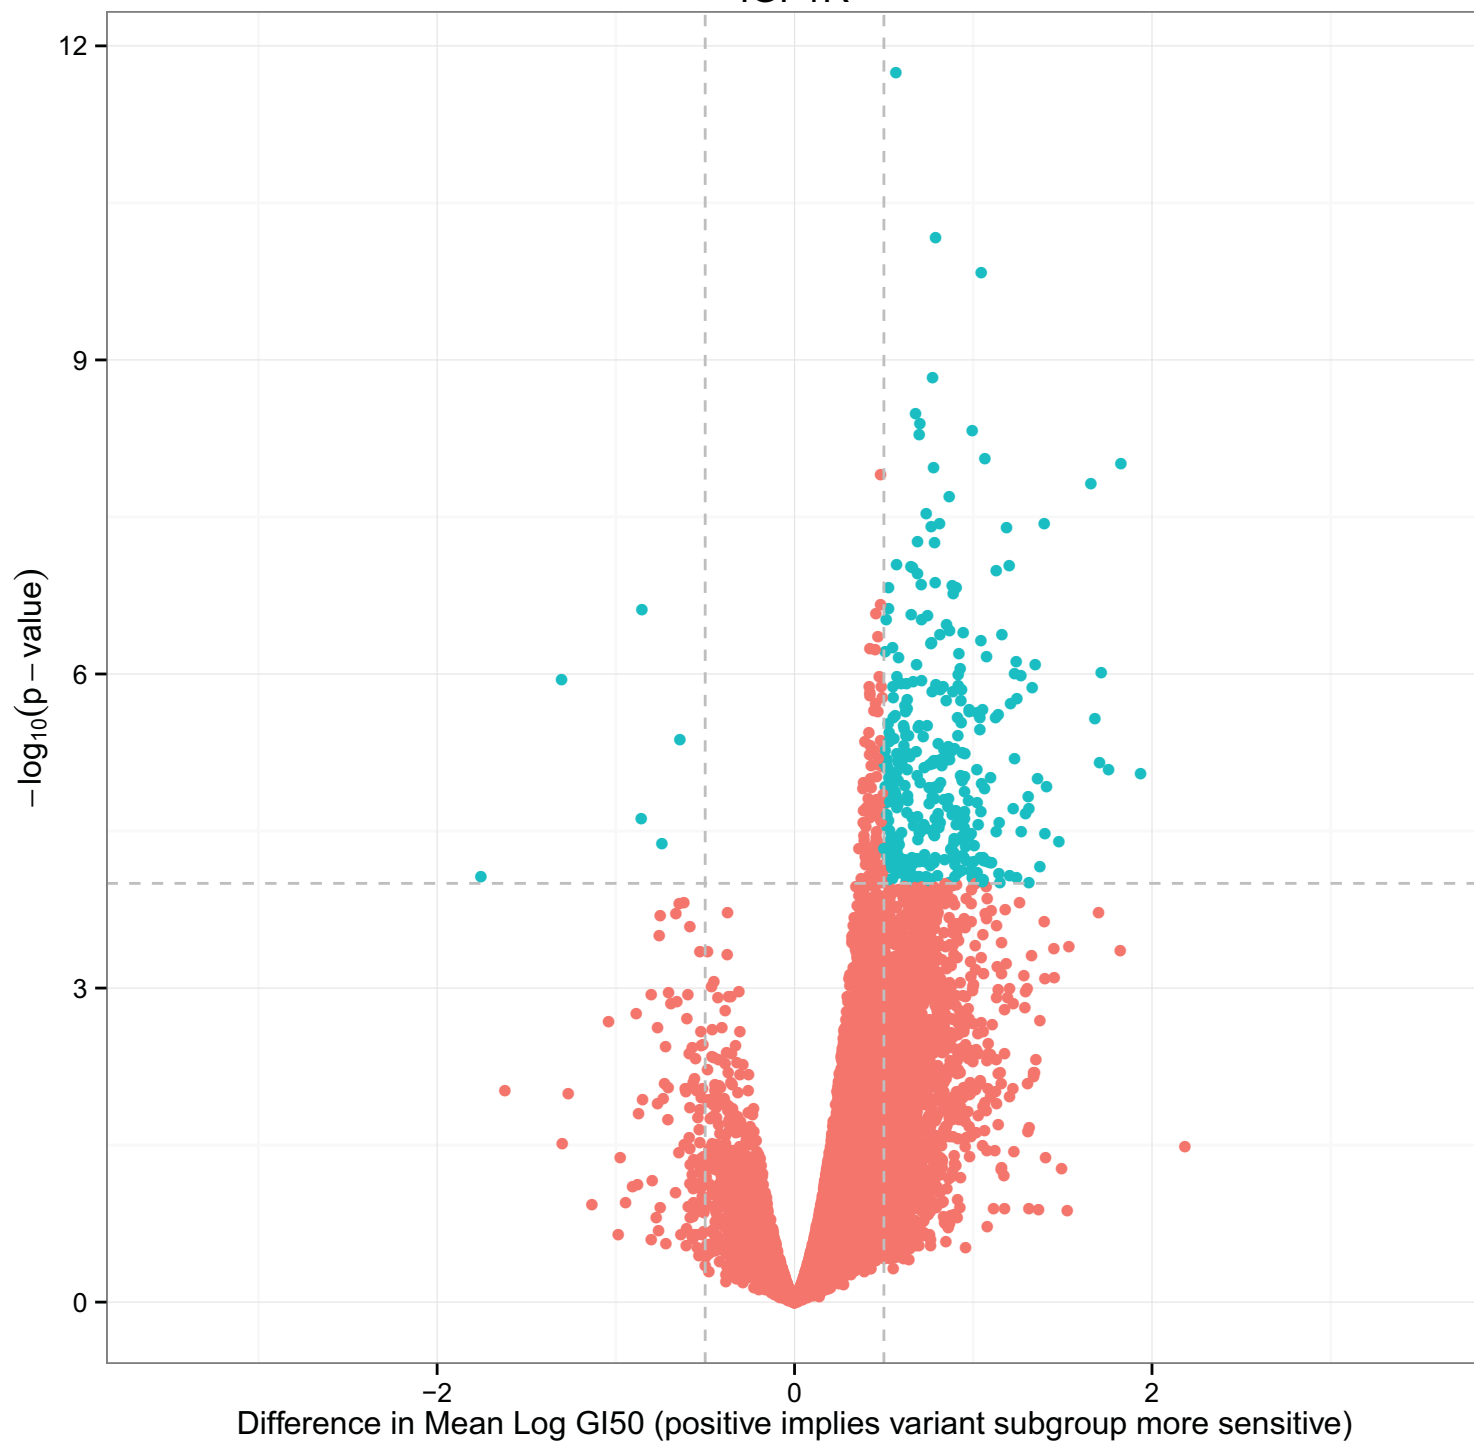



# IGF2R

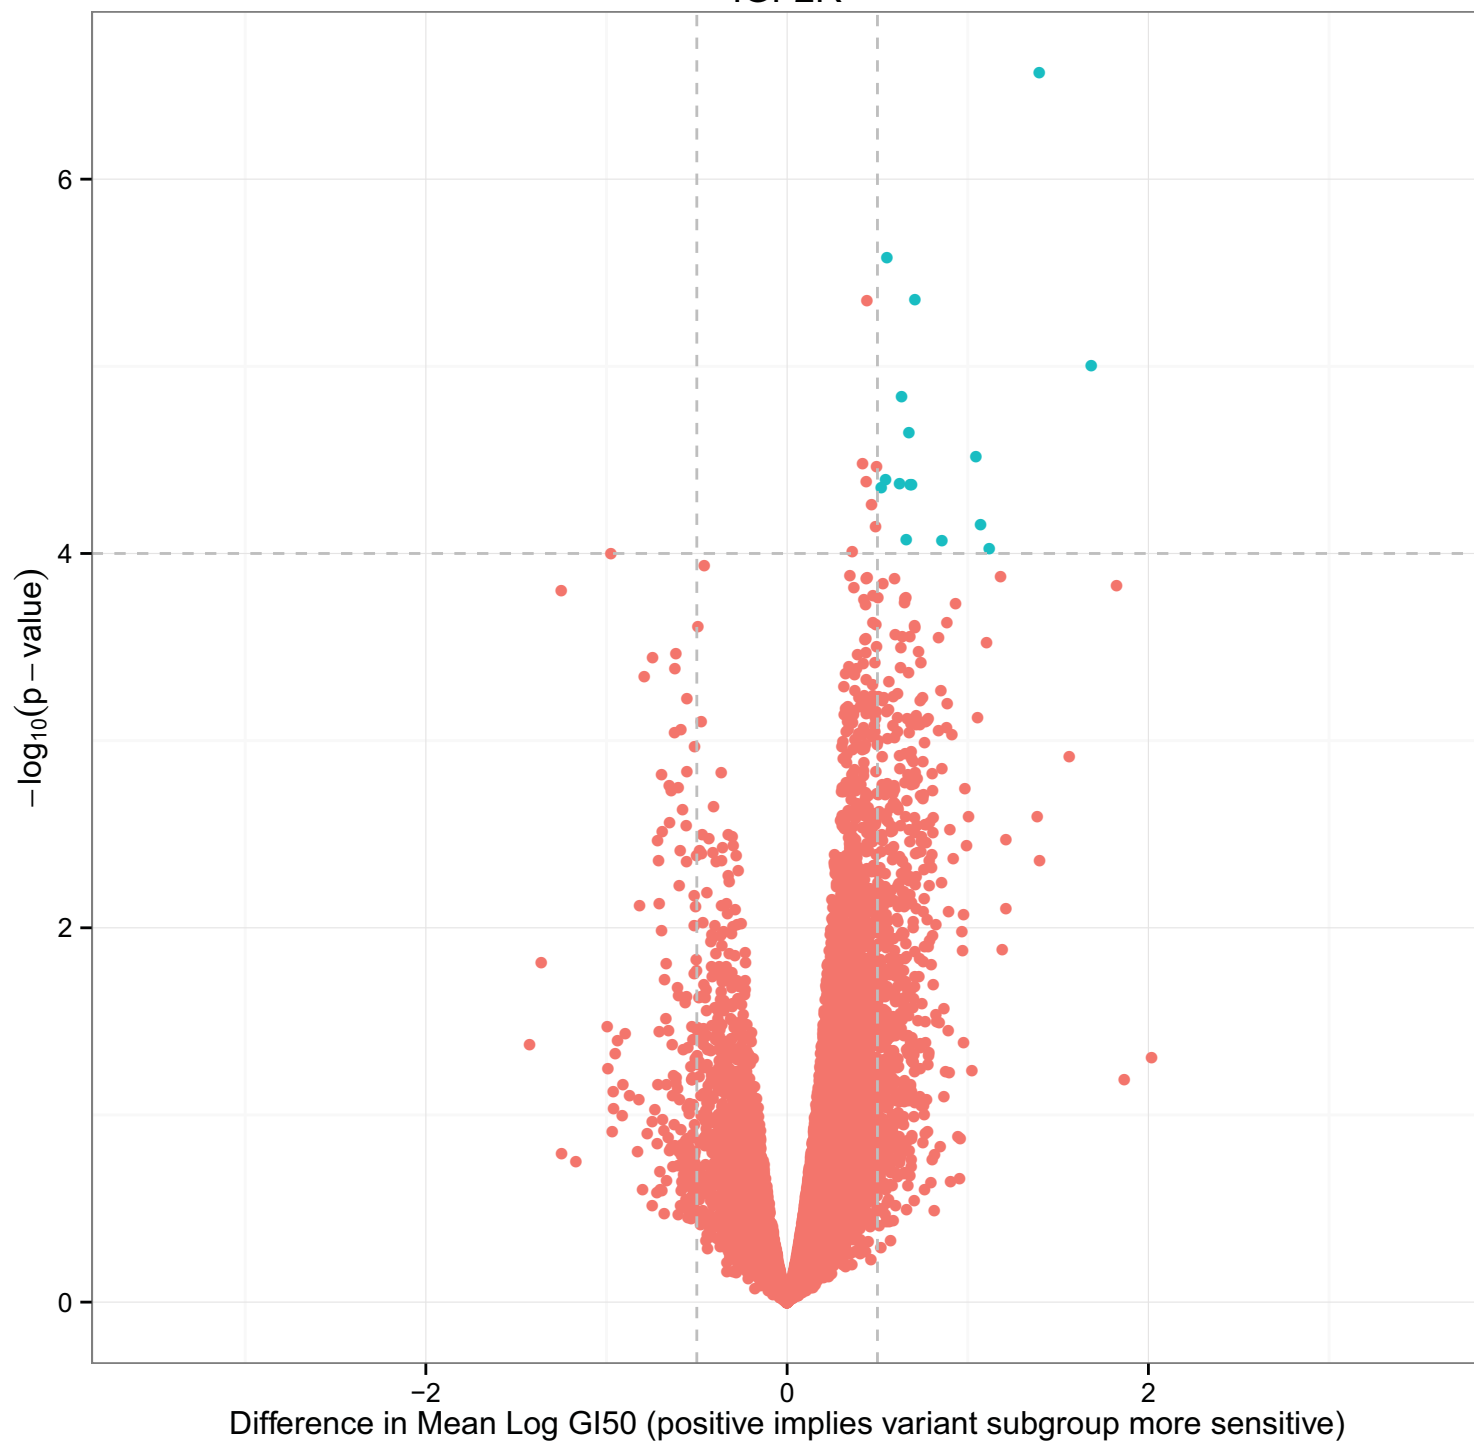

IL4R

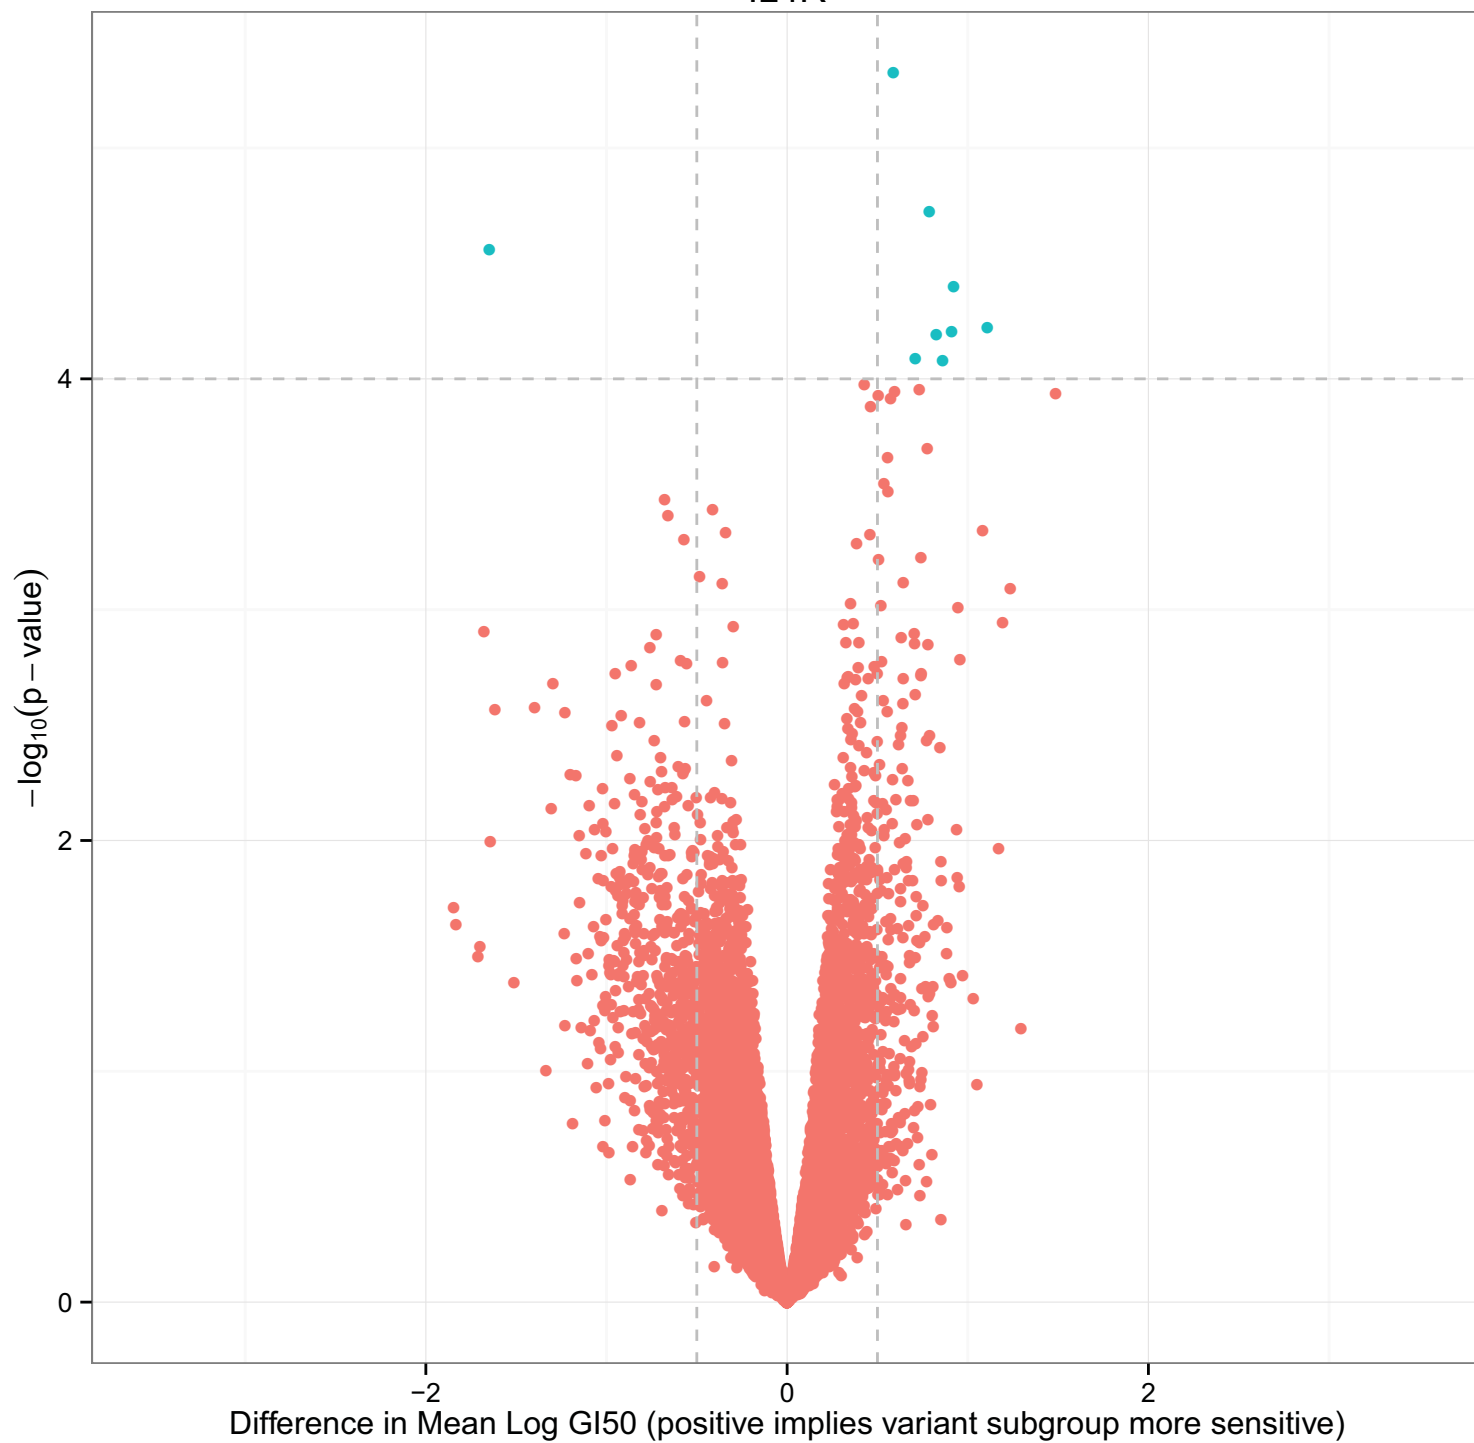

KDR

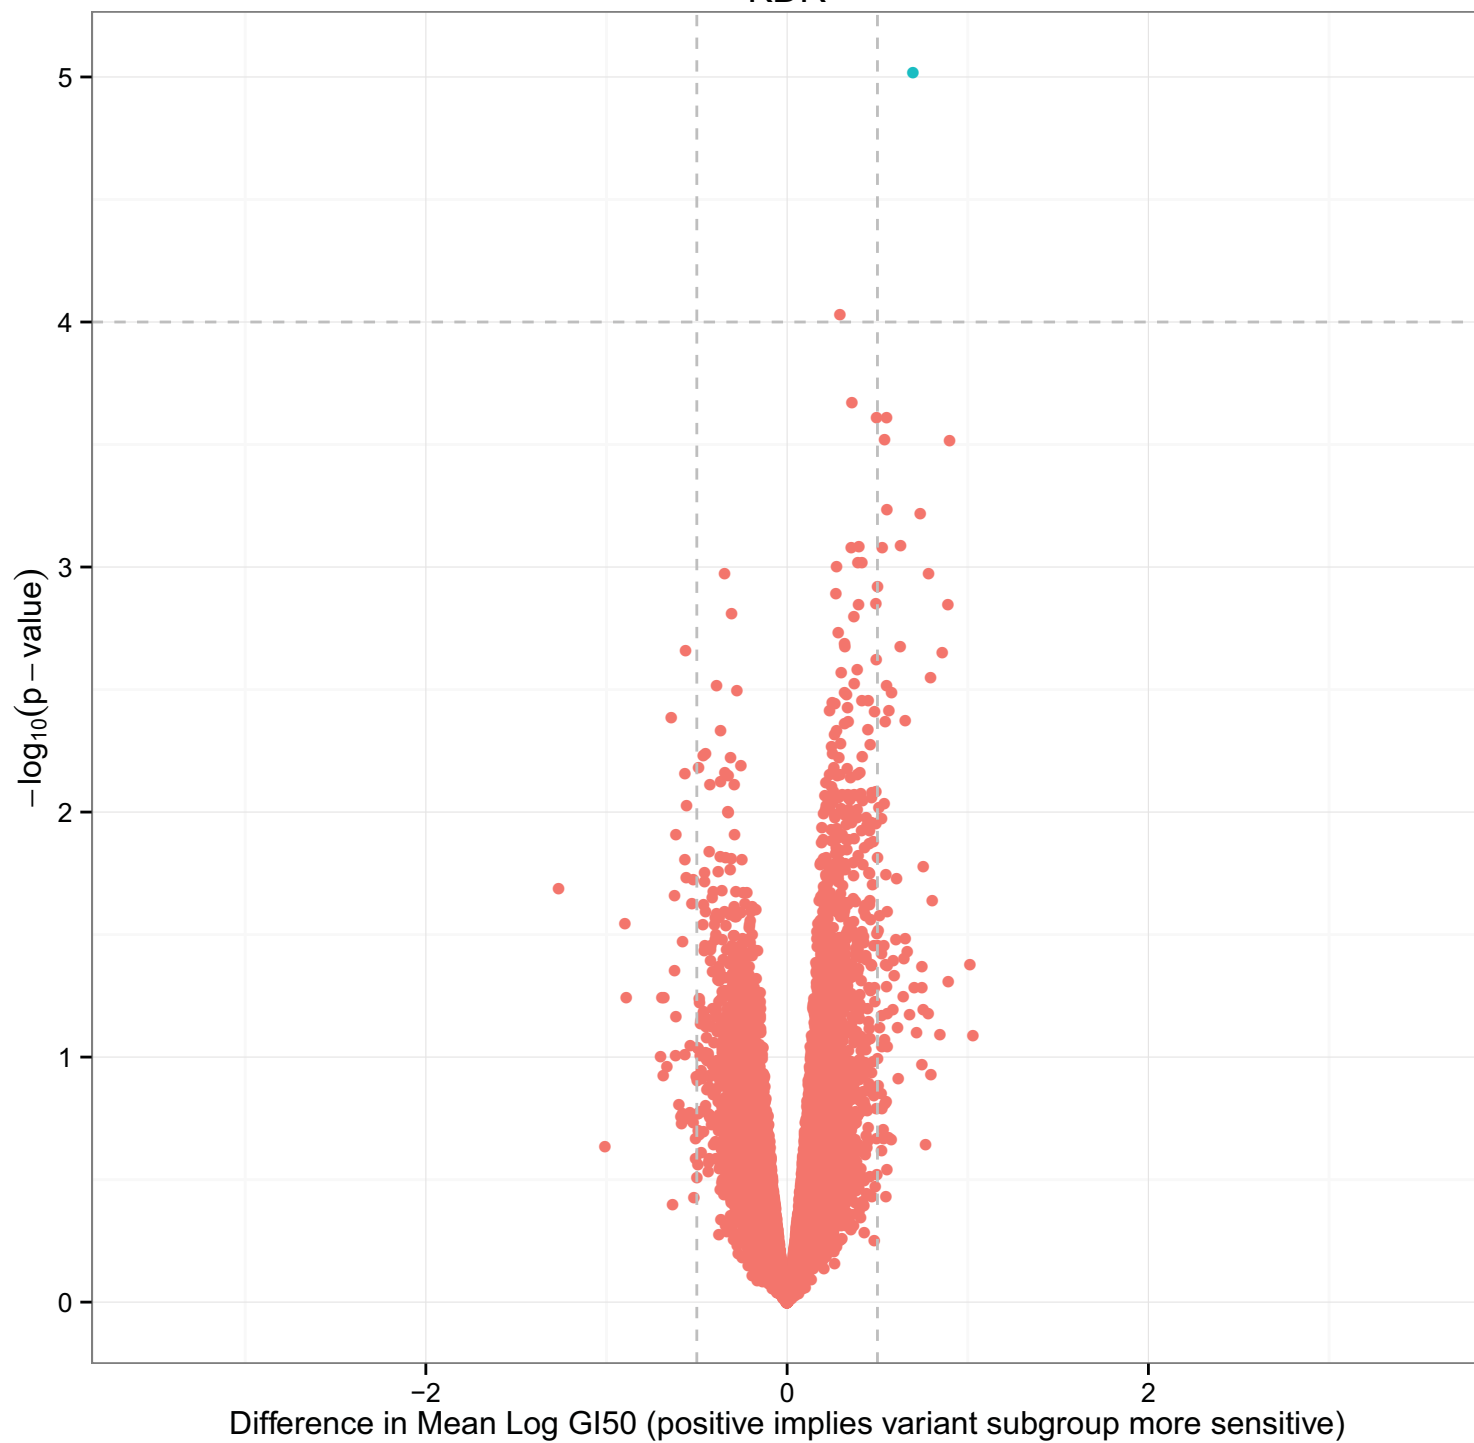

KRAS

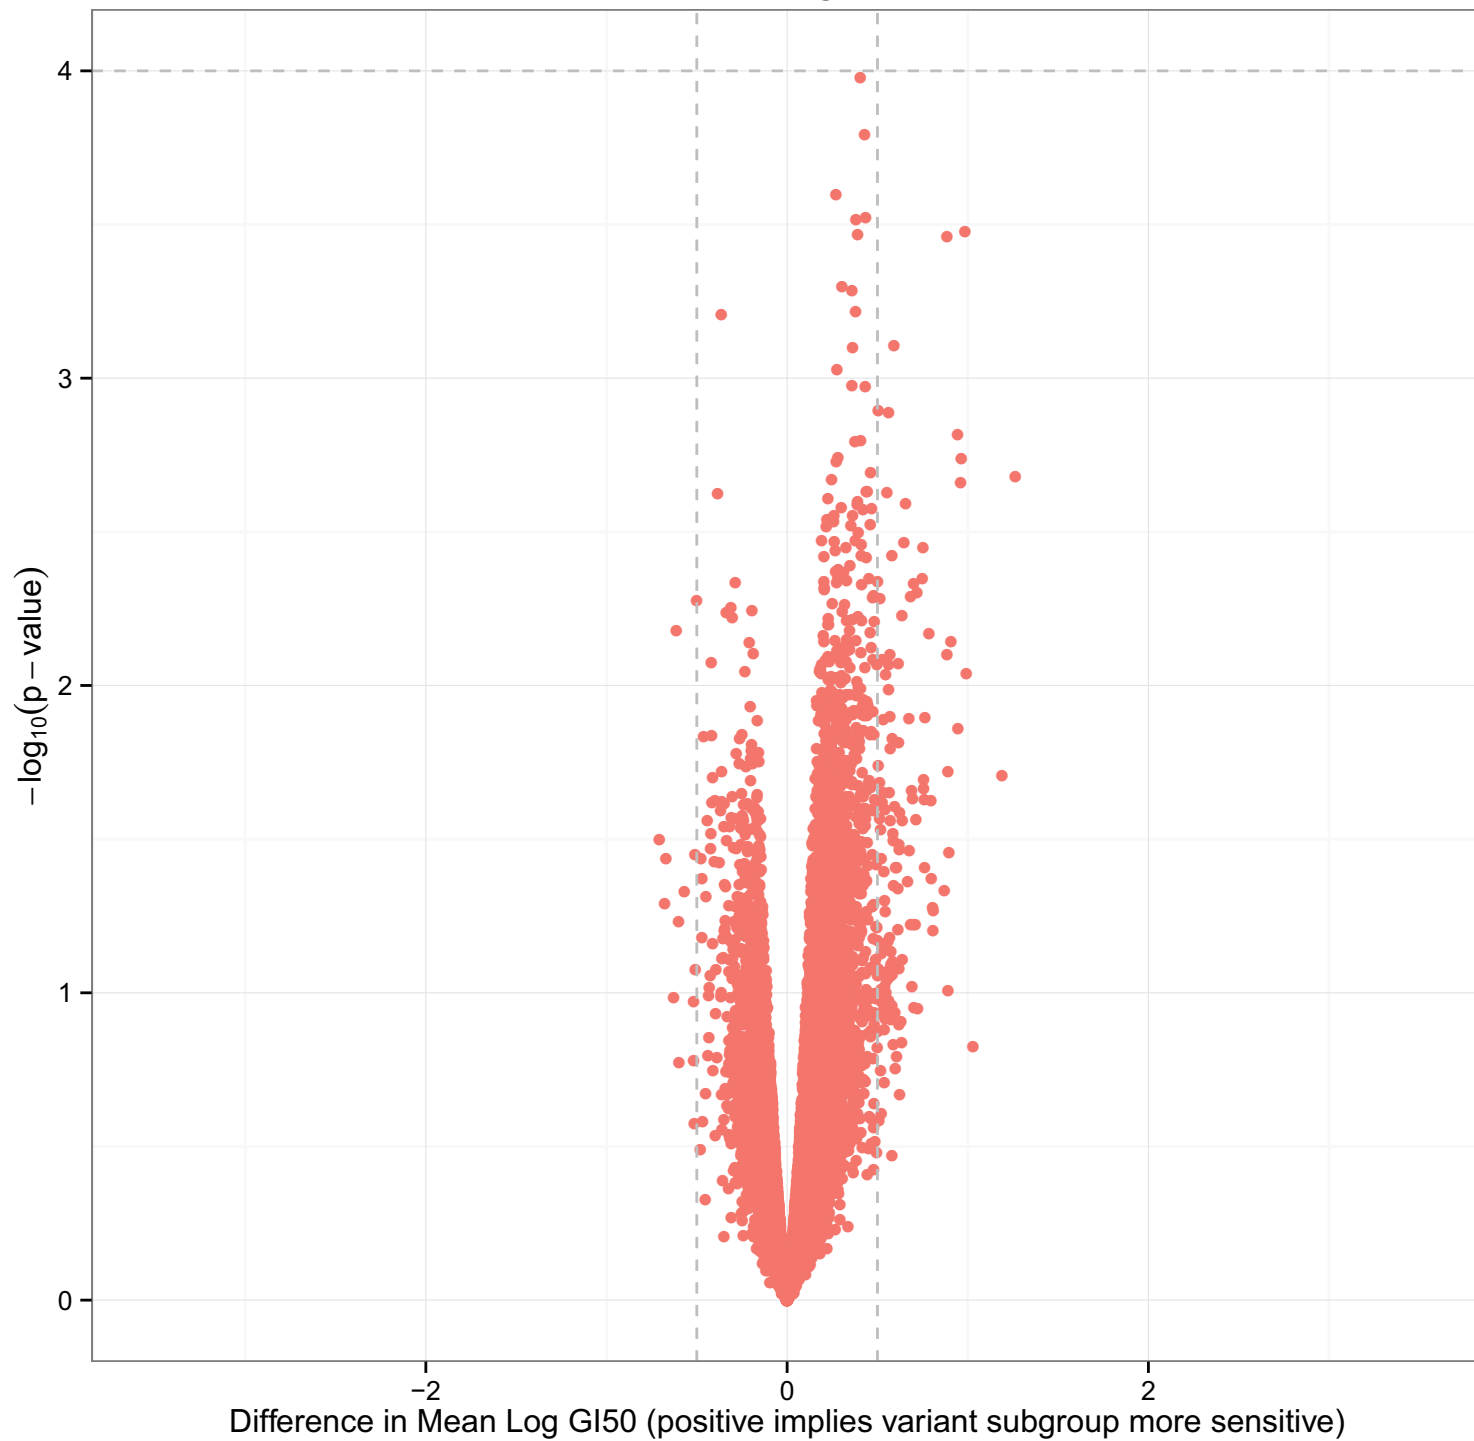

# LRP1B

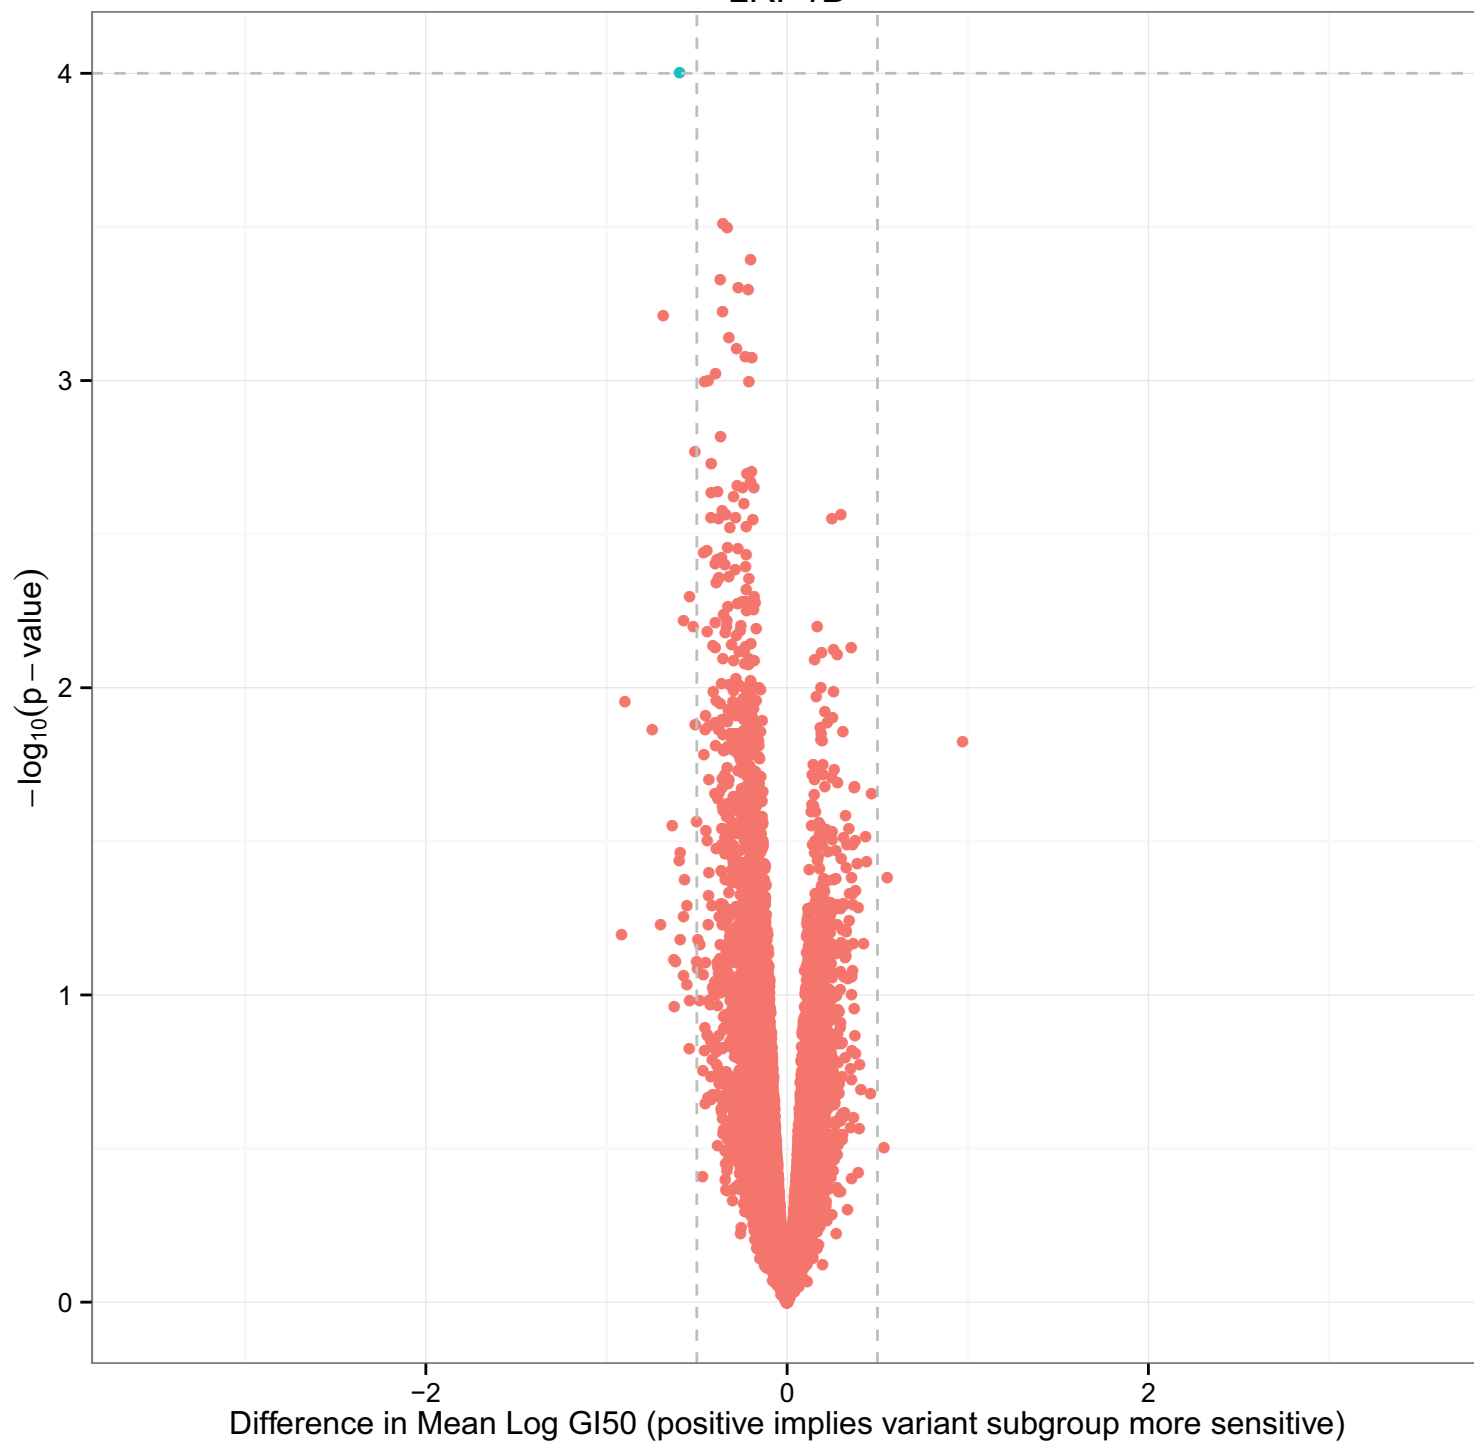

MLH1

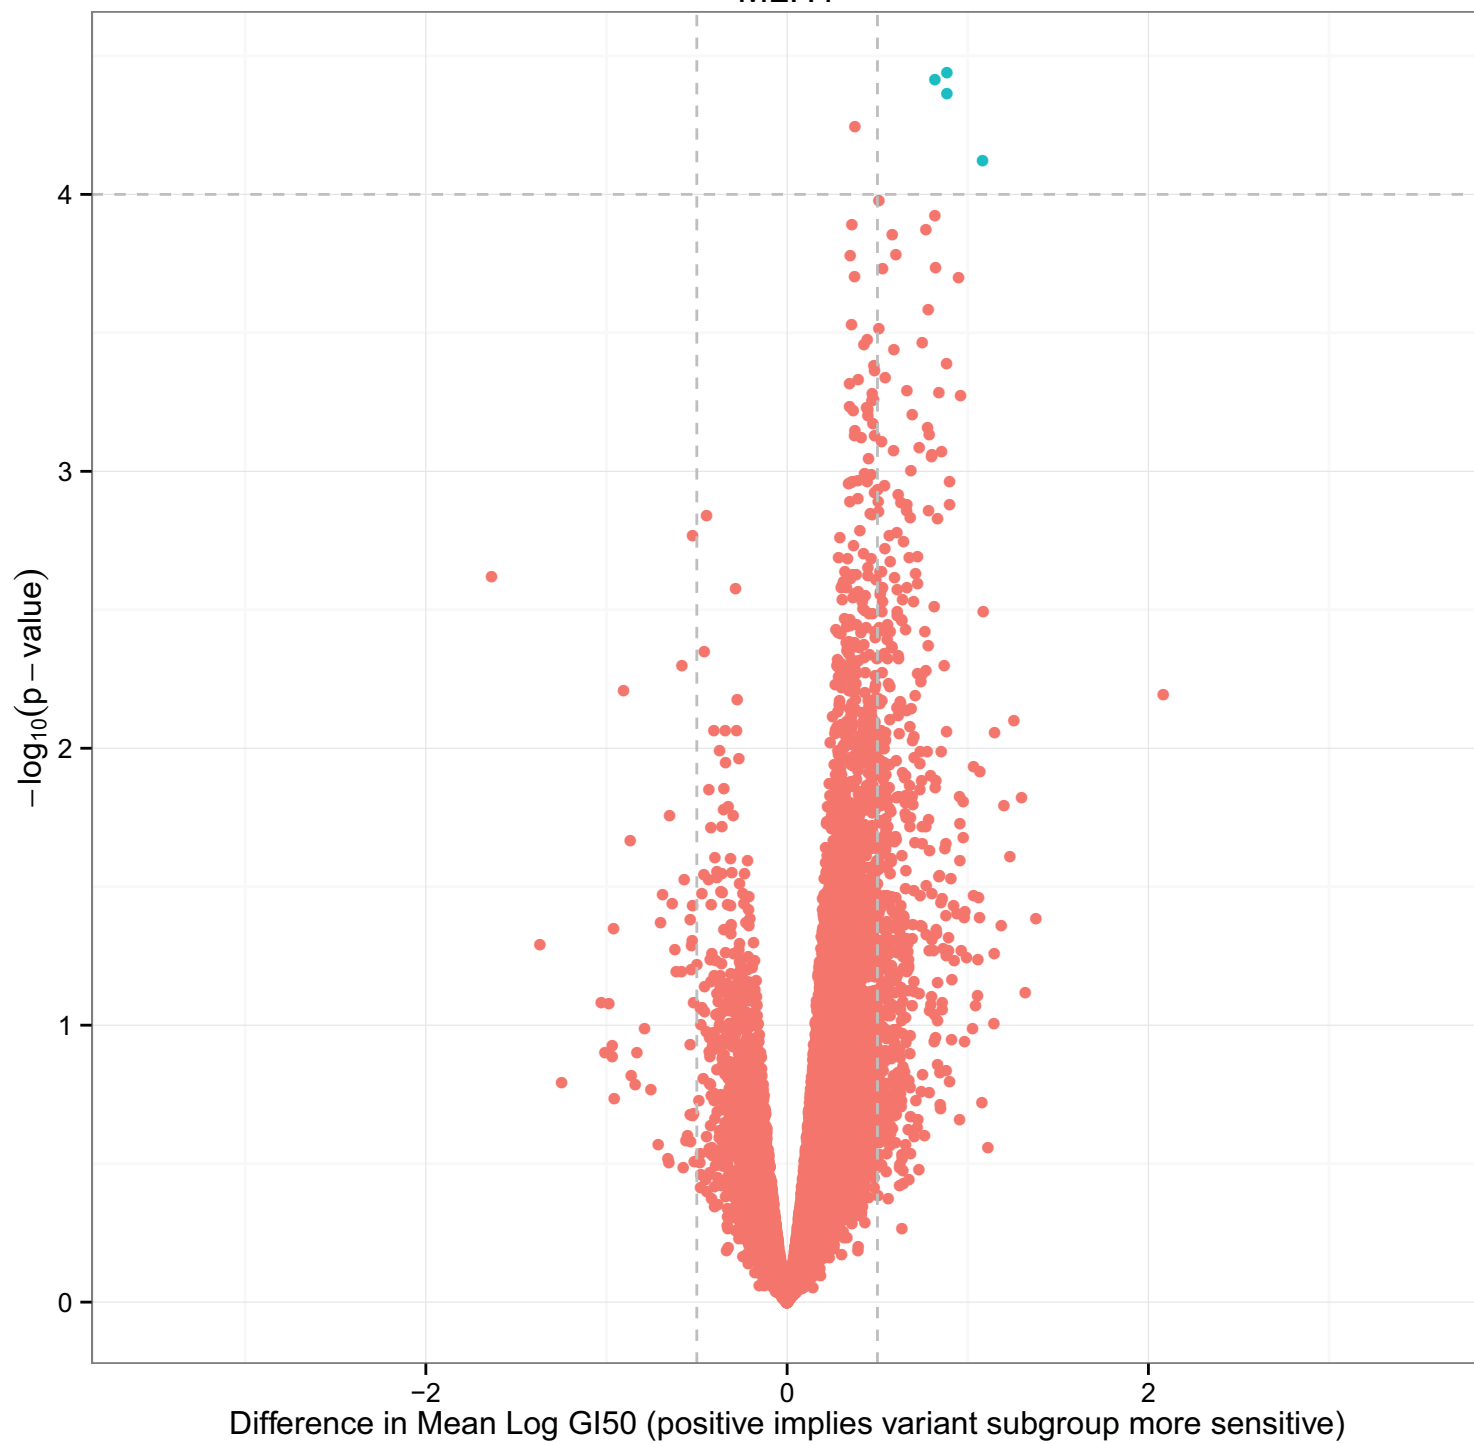

MSH2

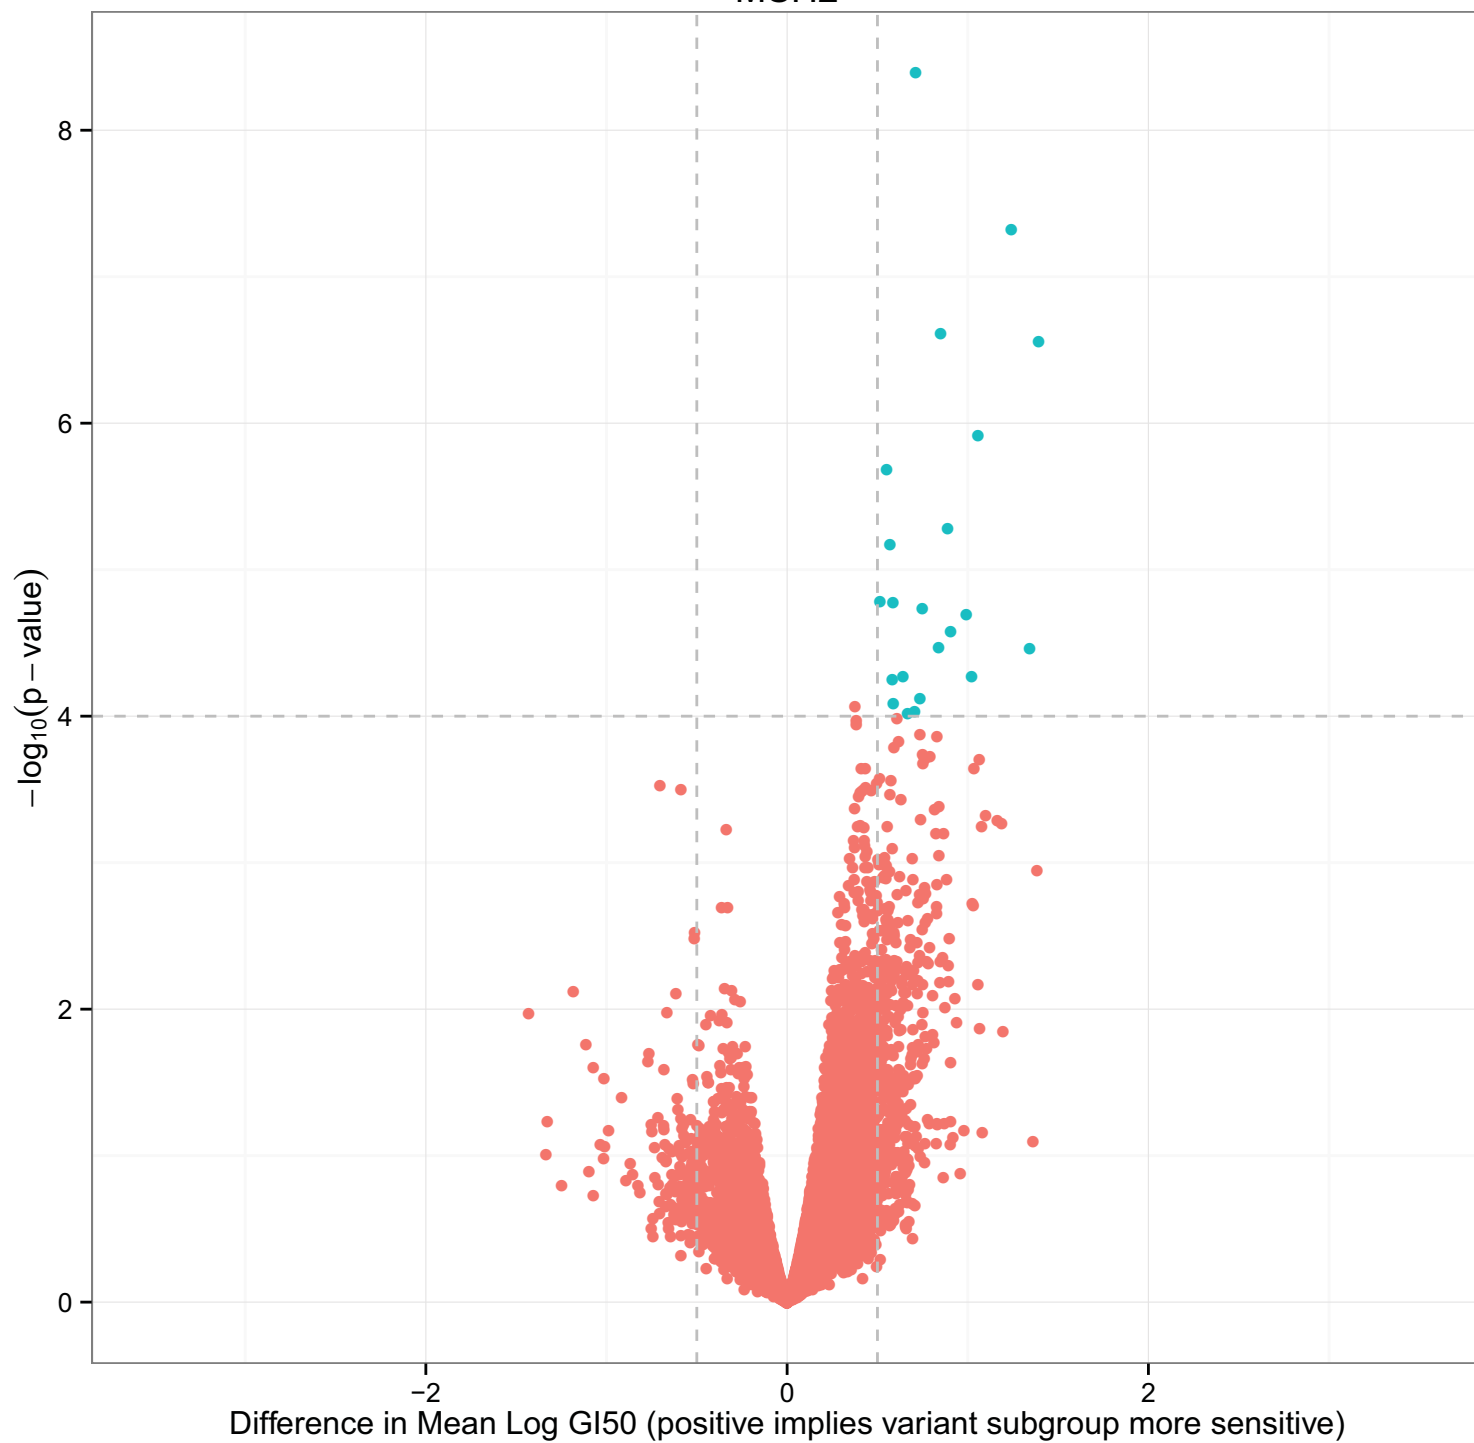

NF1

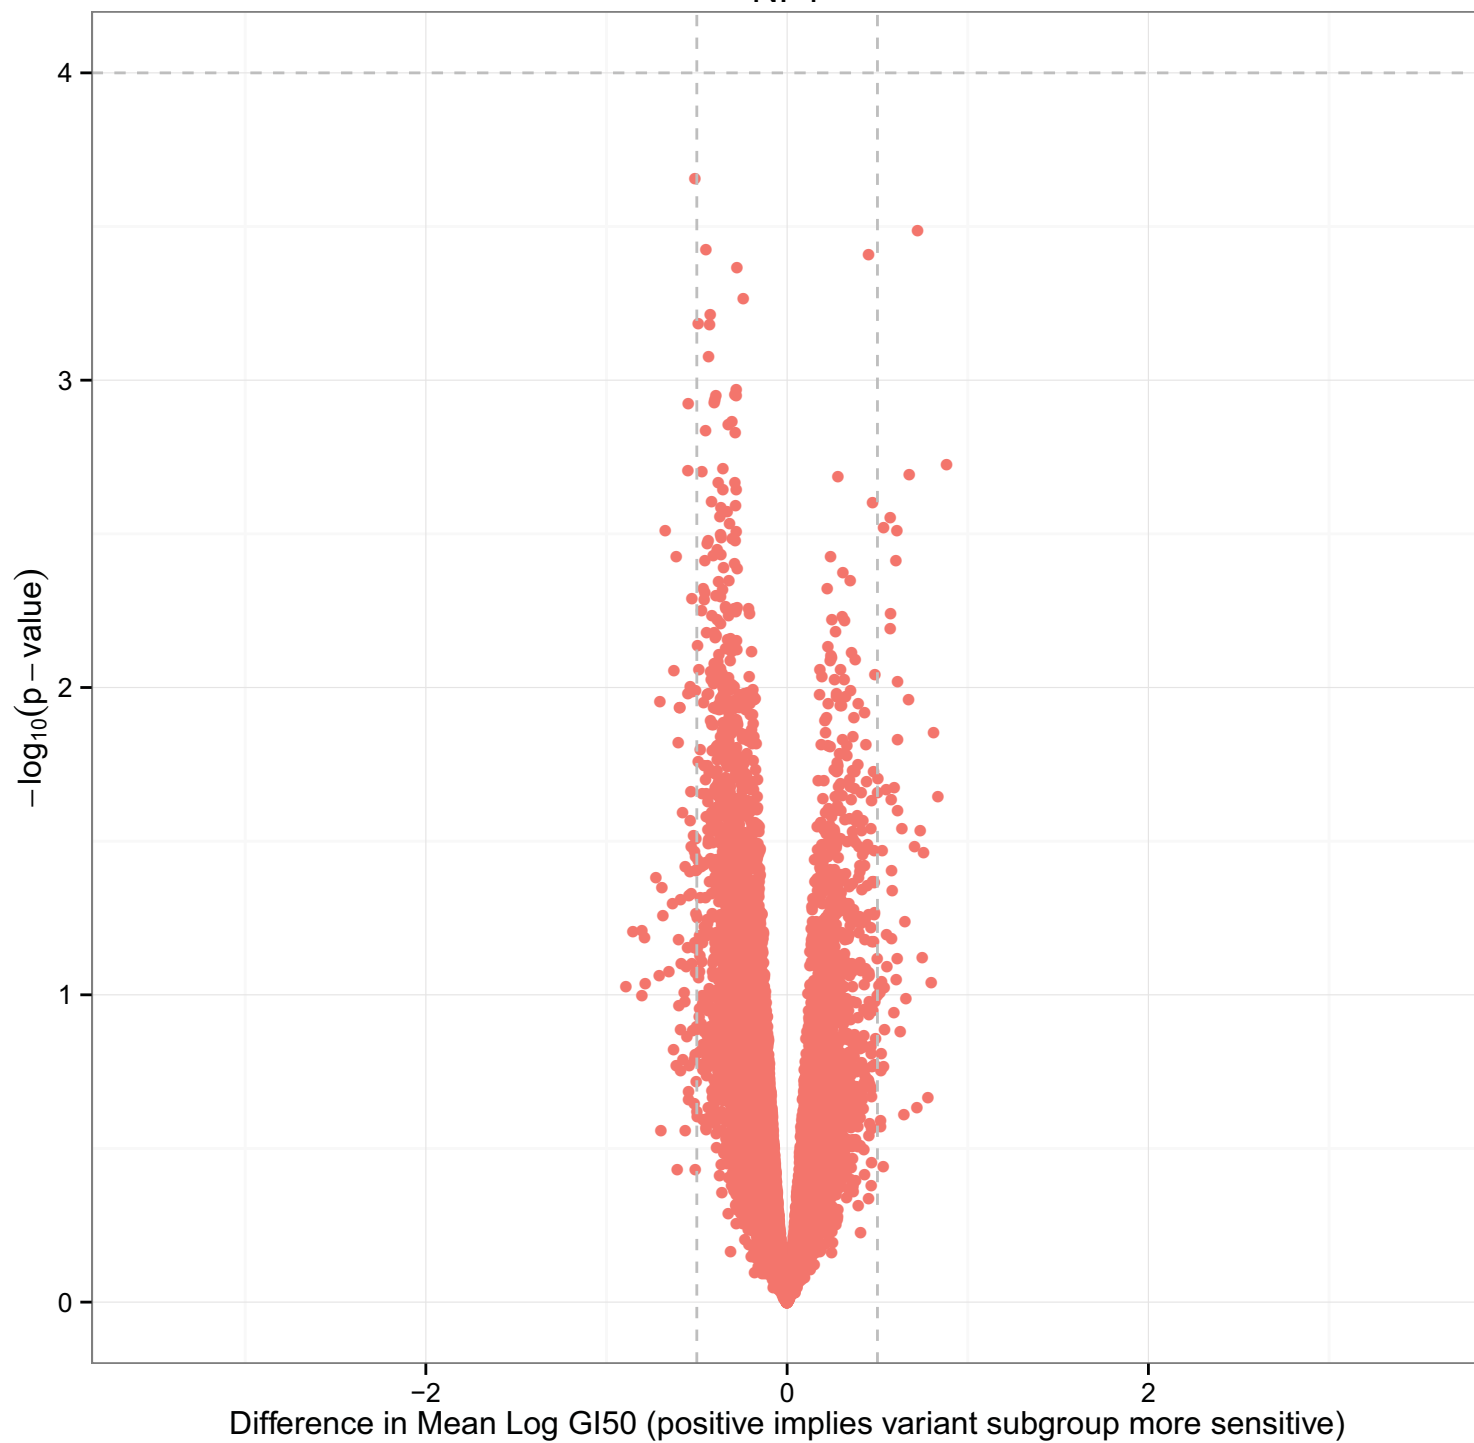



# NOTCH1

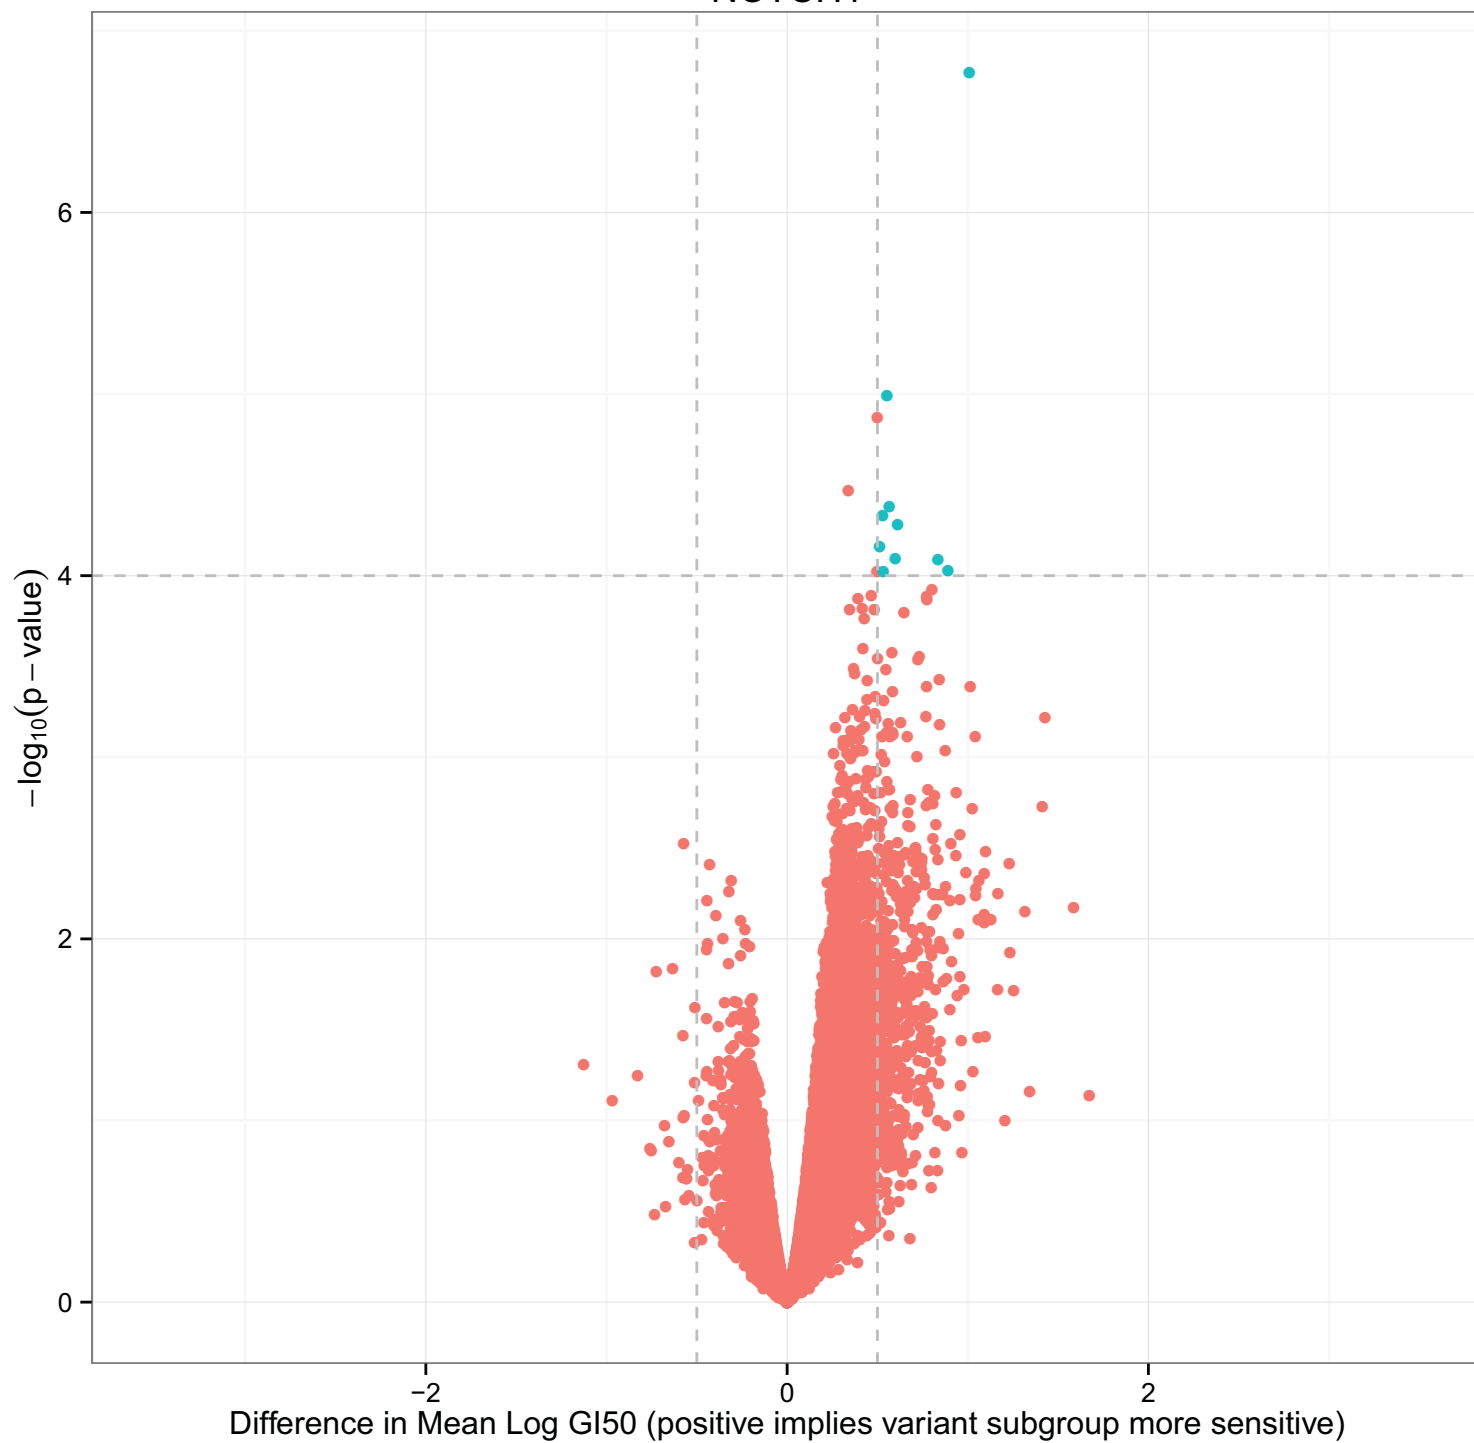

# NOTCH3

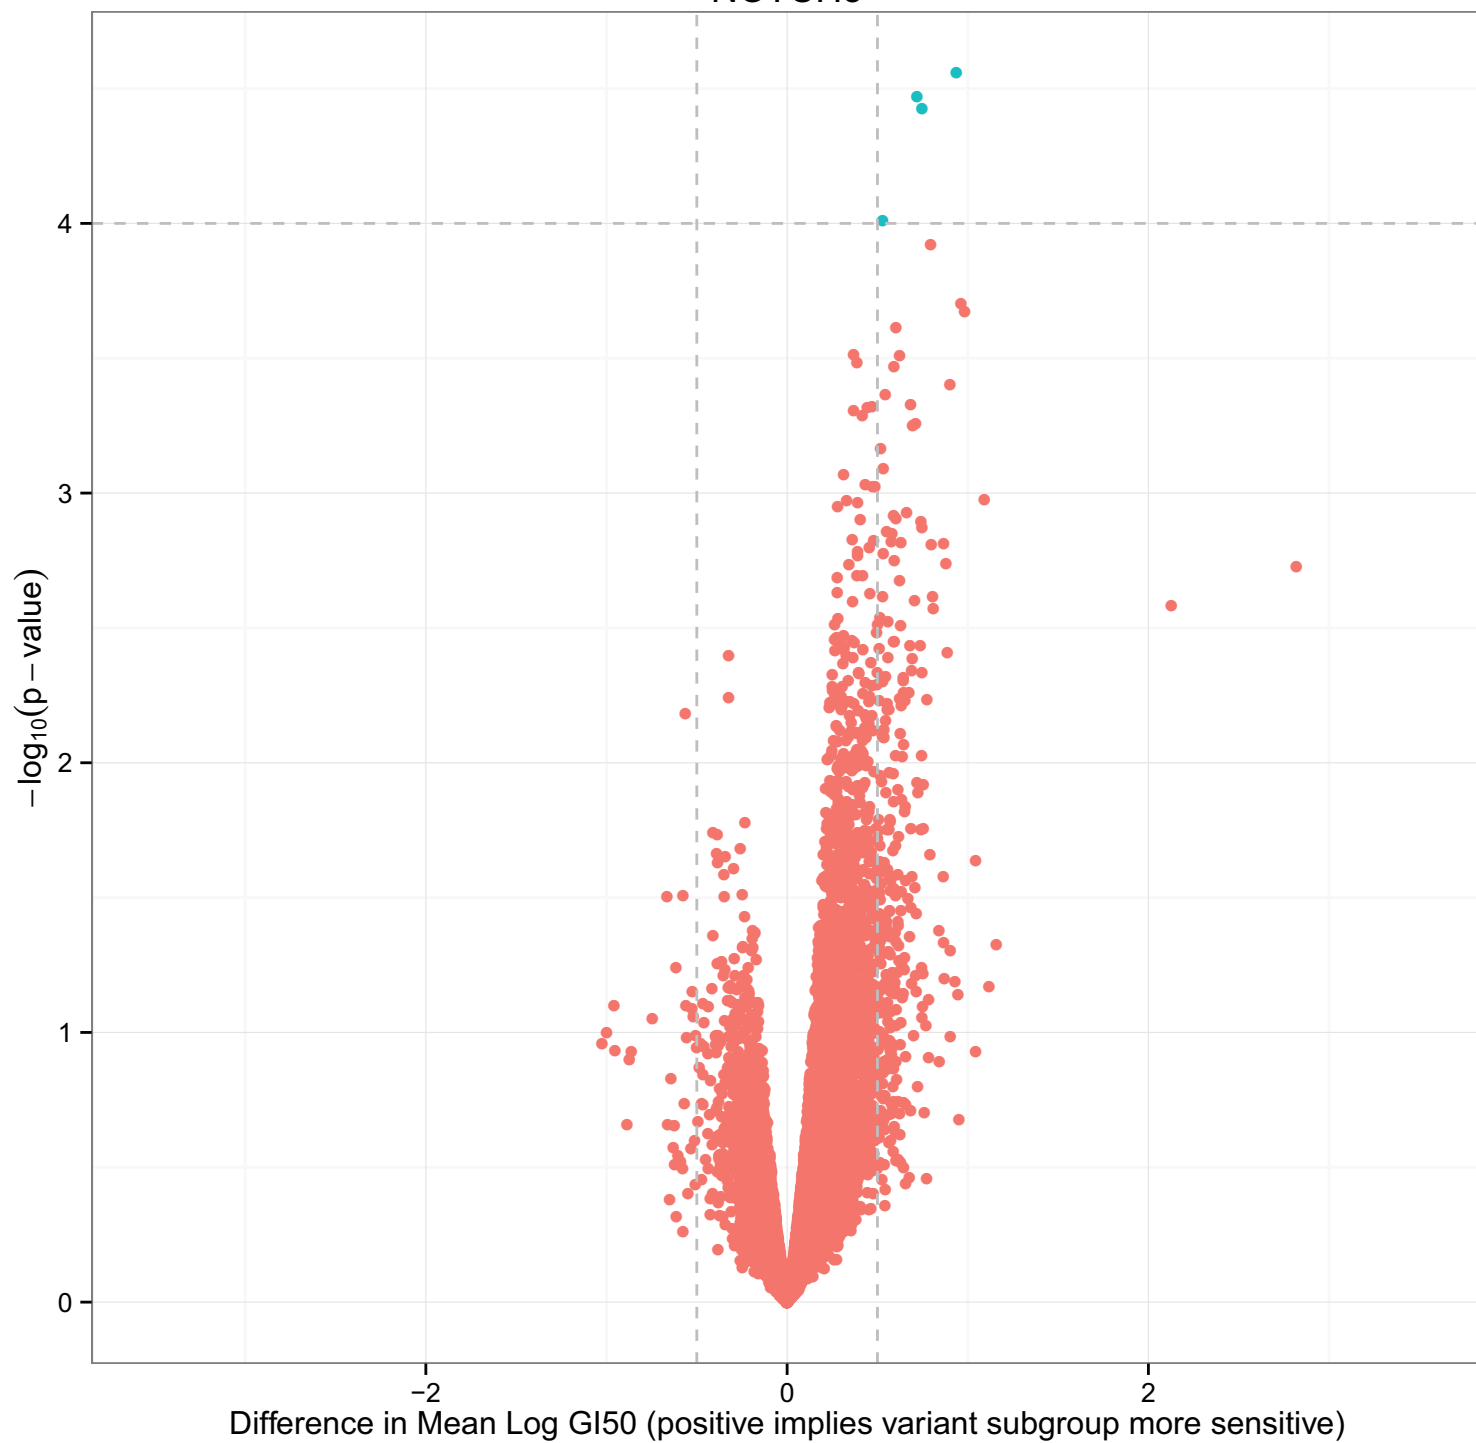

# NTRK2

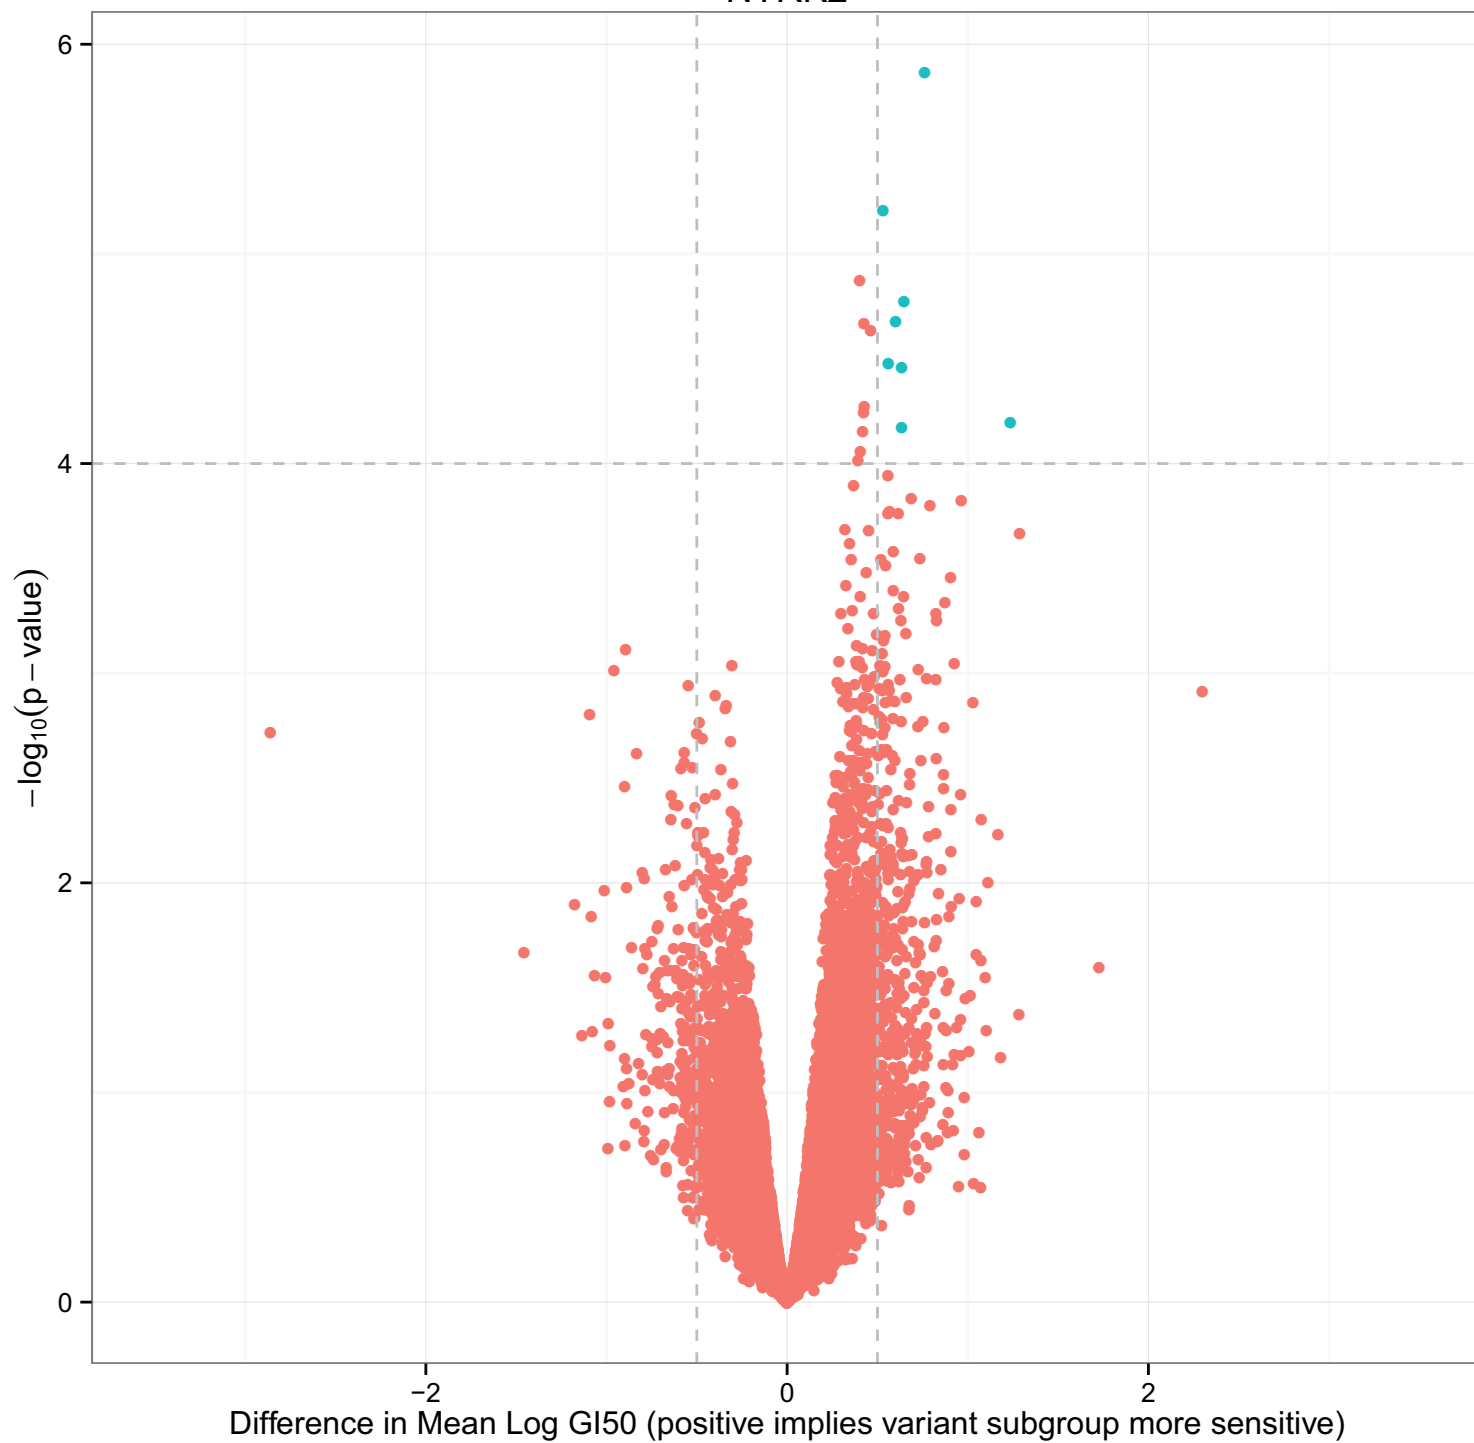

# PDGFRA

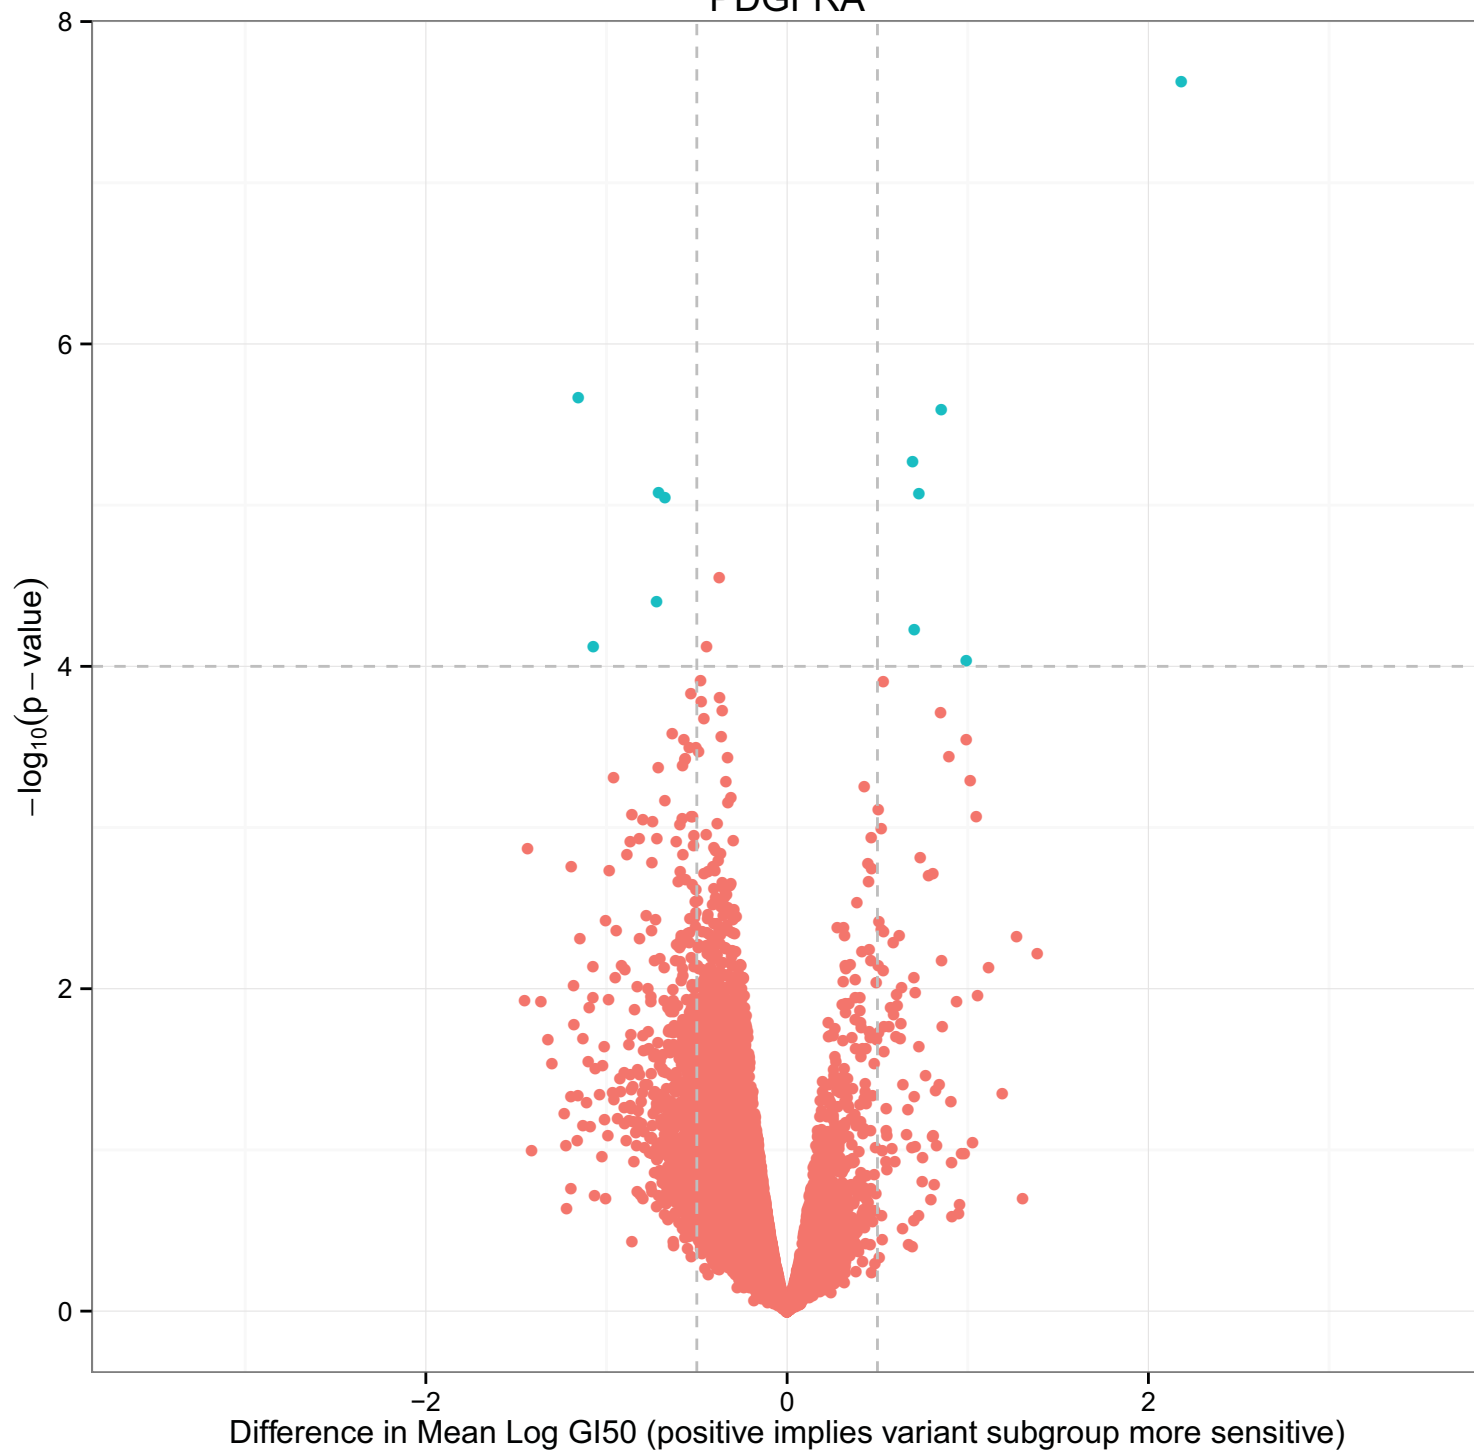

# PIK3CA

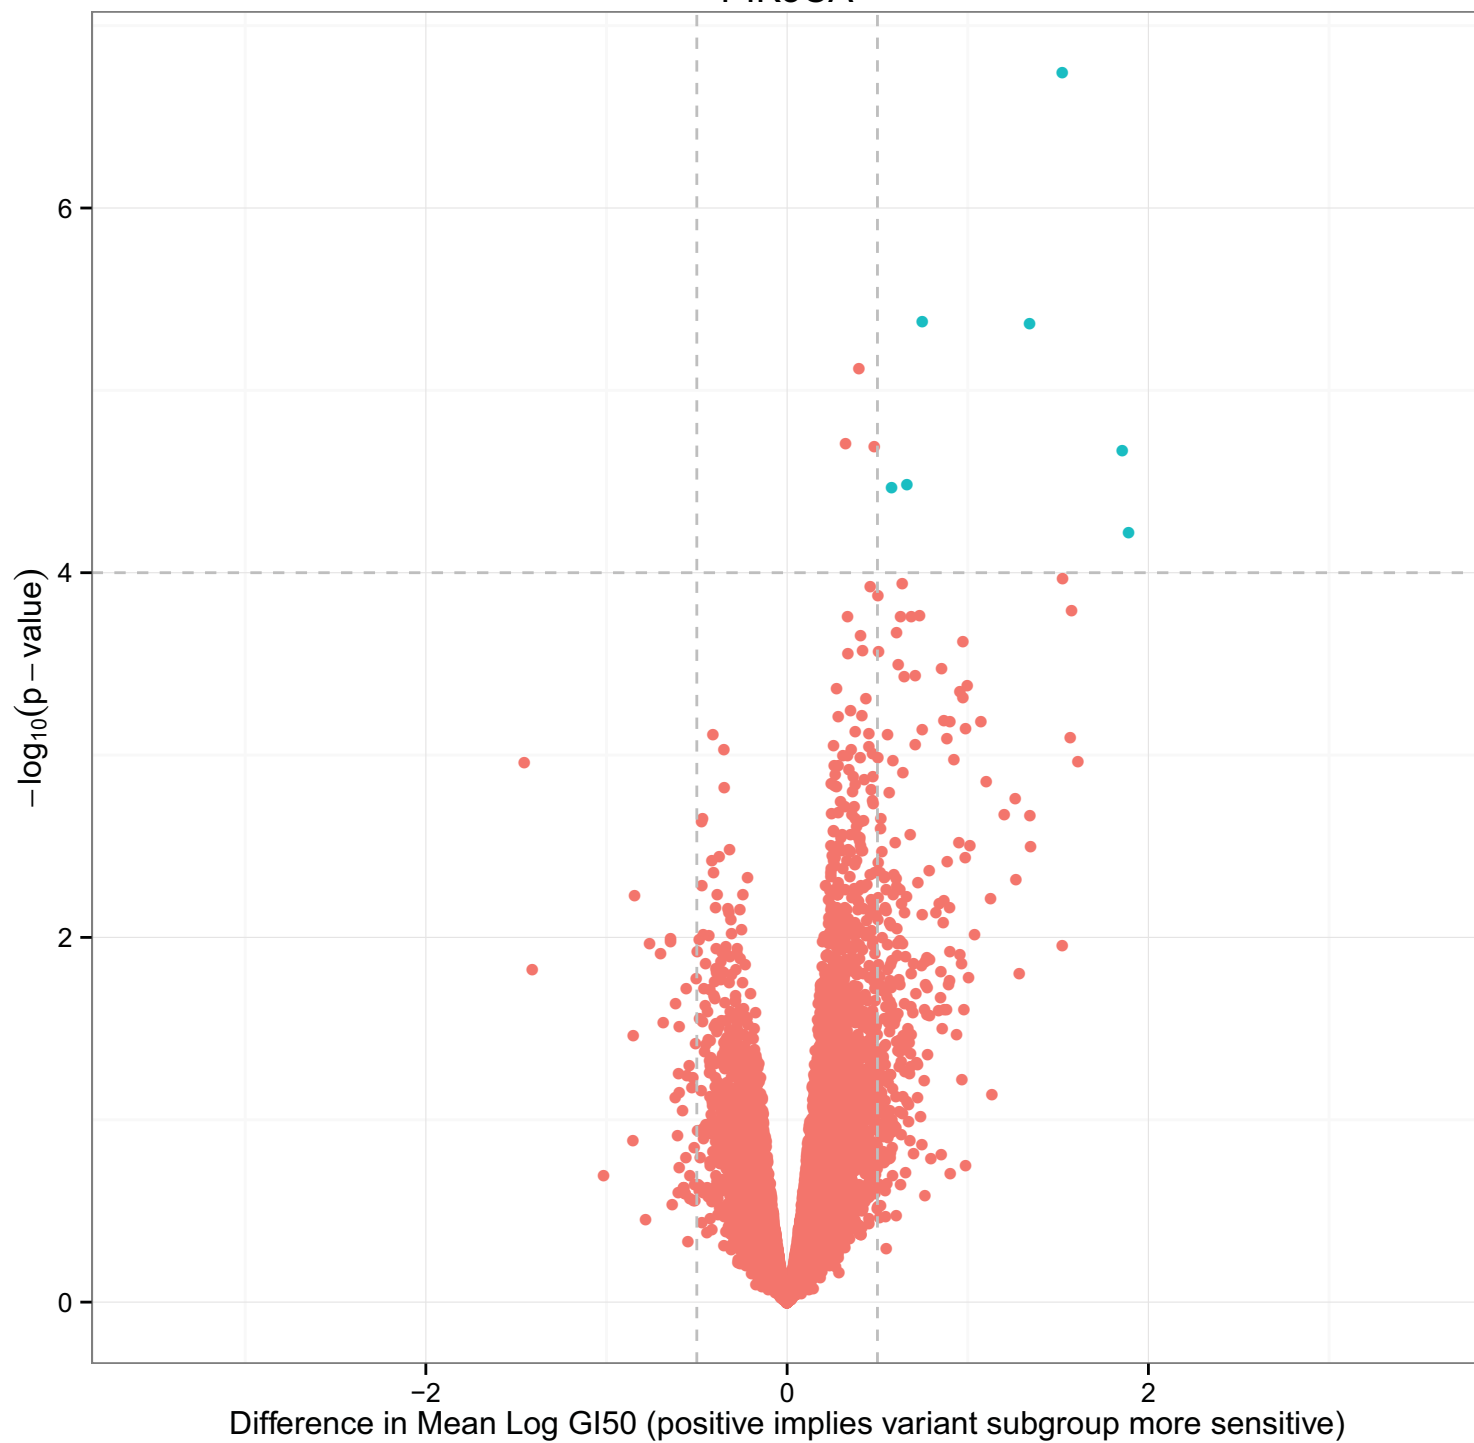

PIK3CB

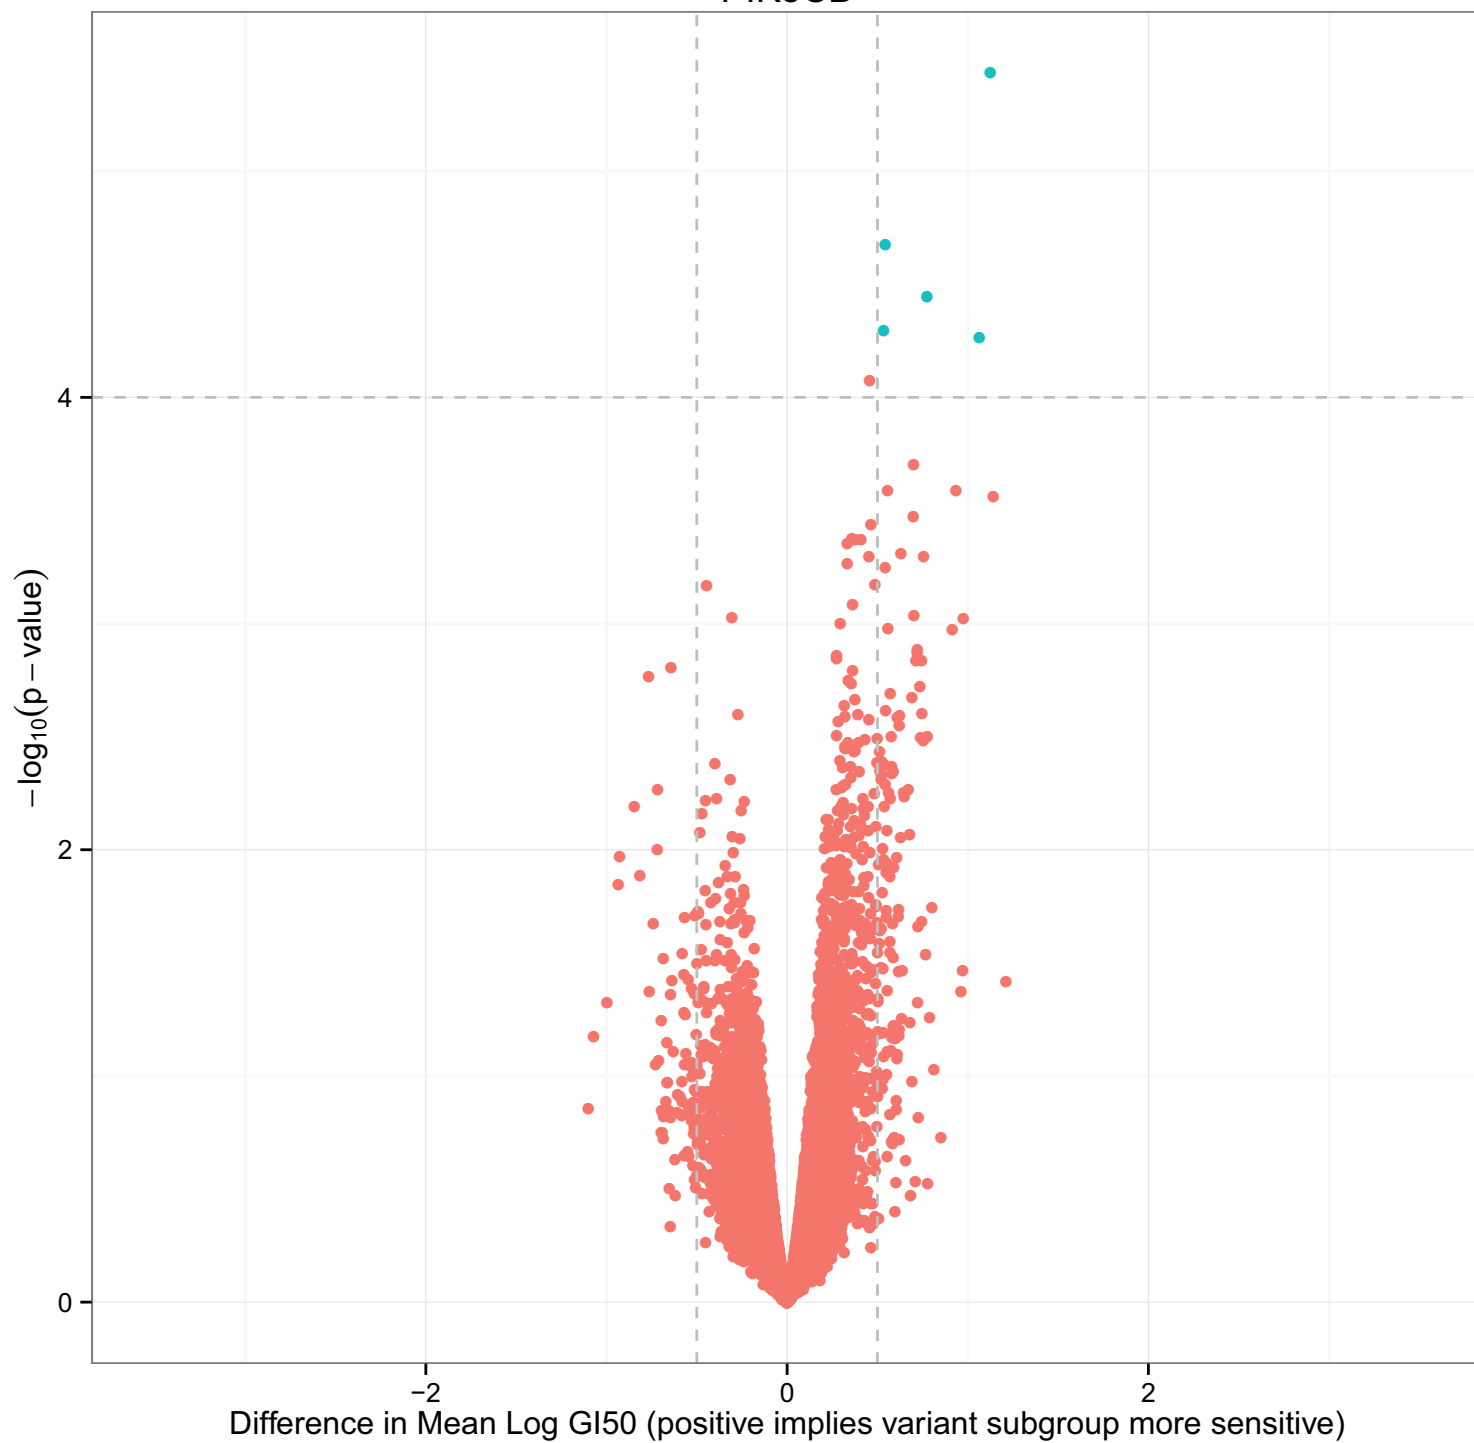

PKHD1

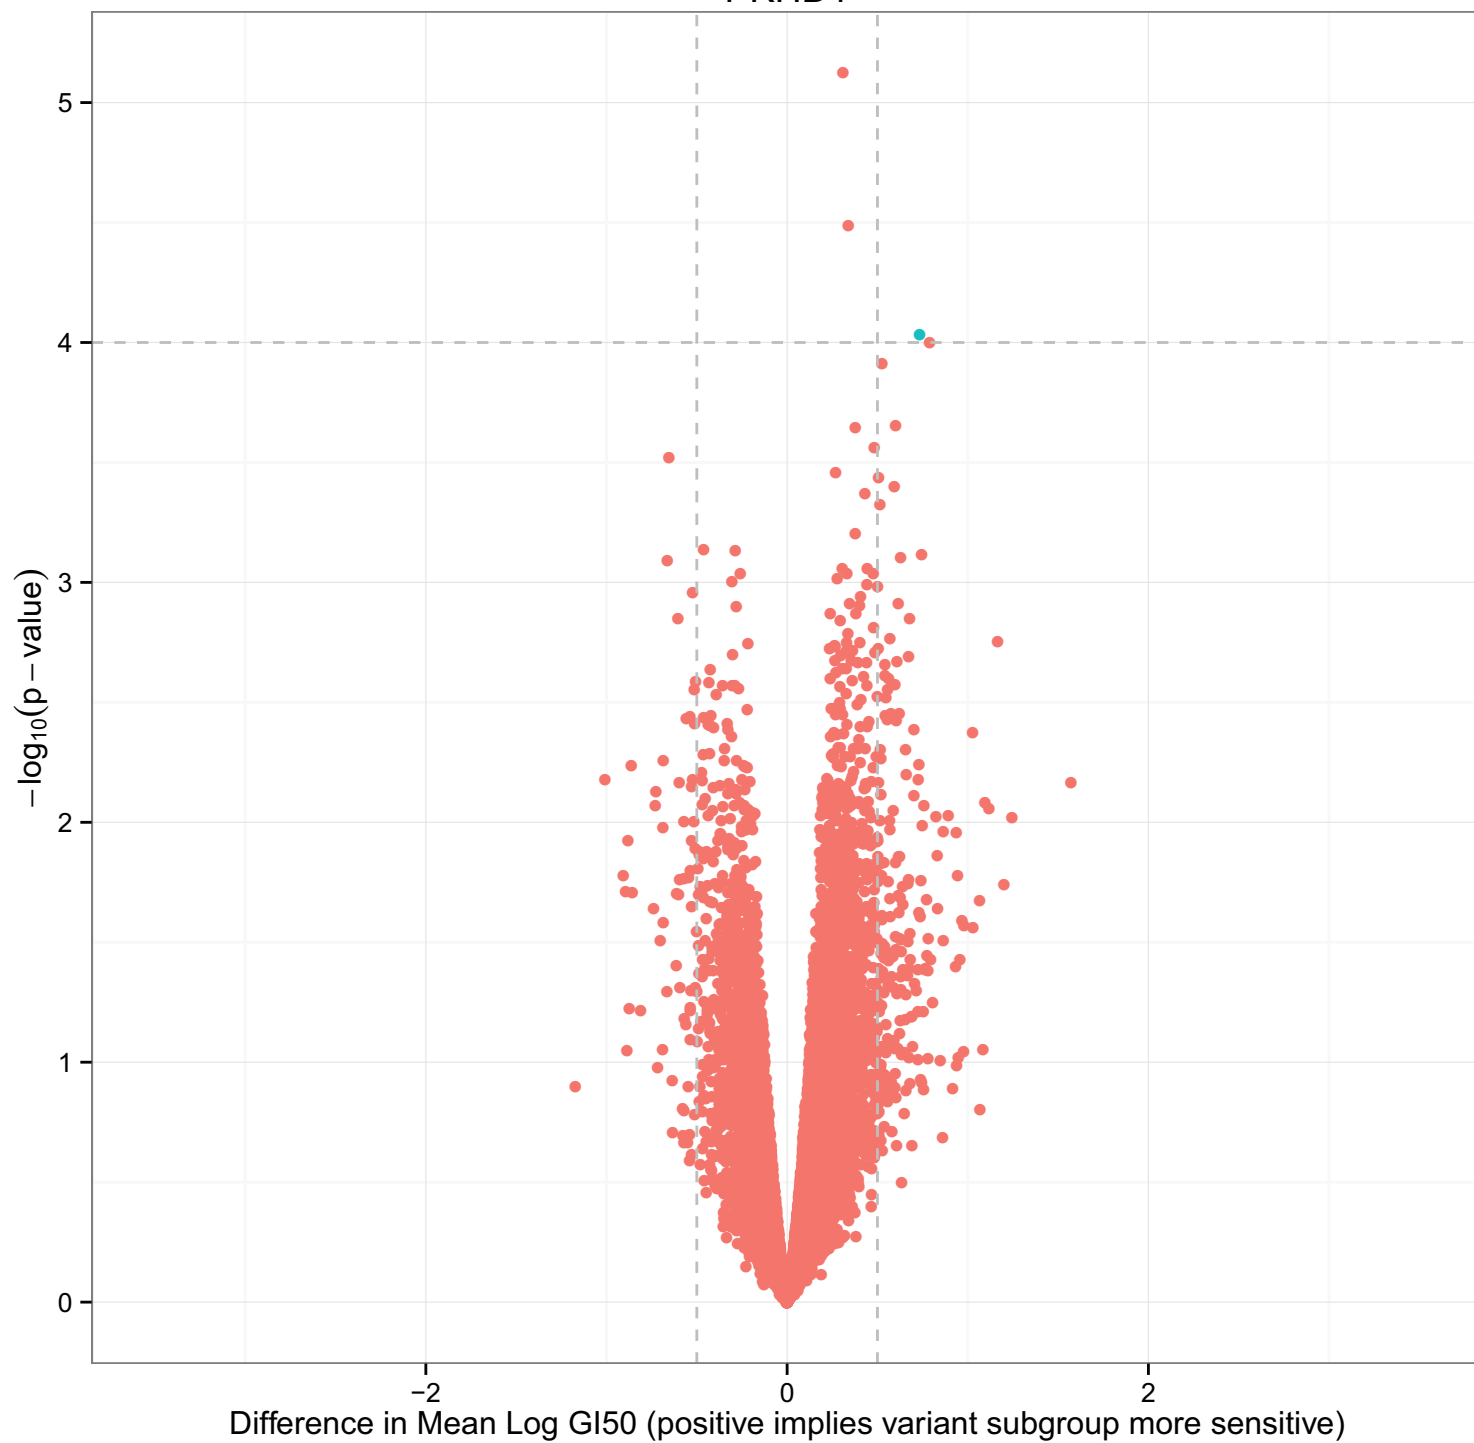

POLE

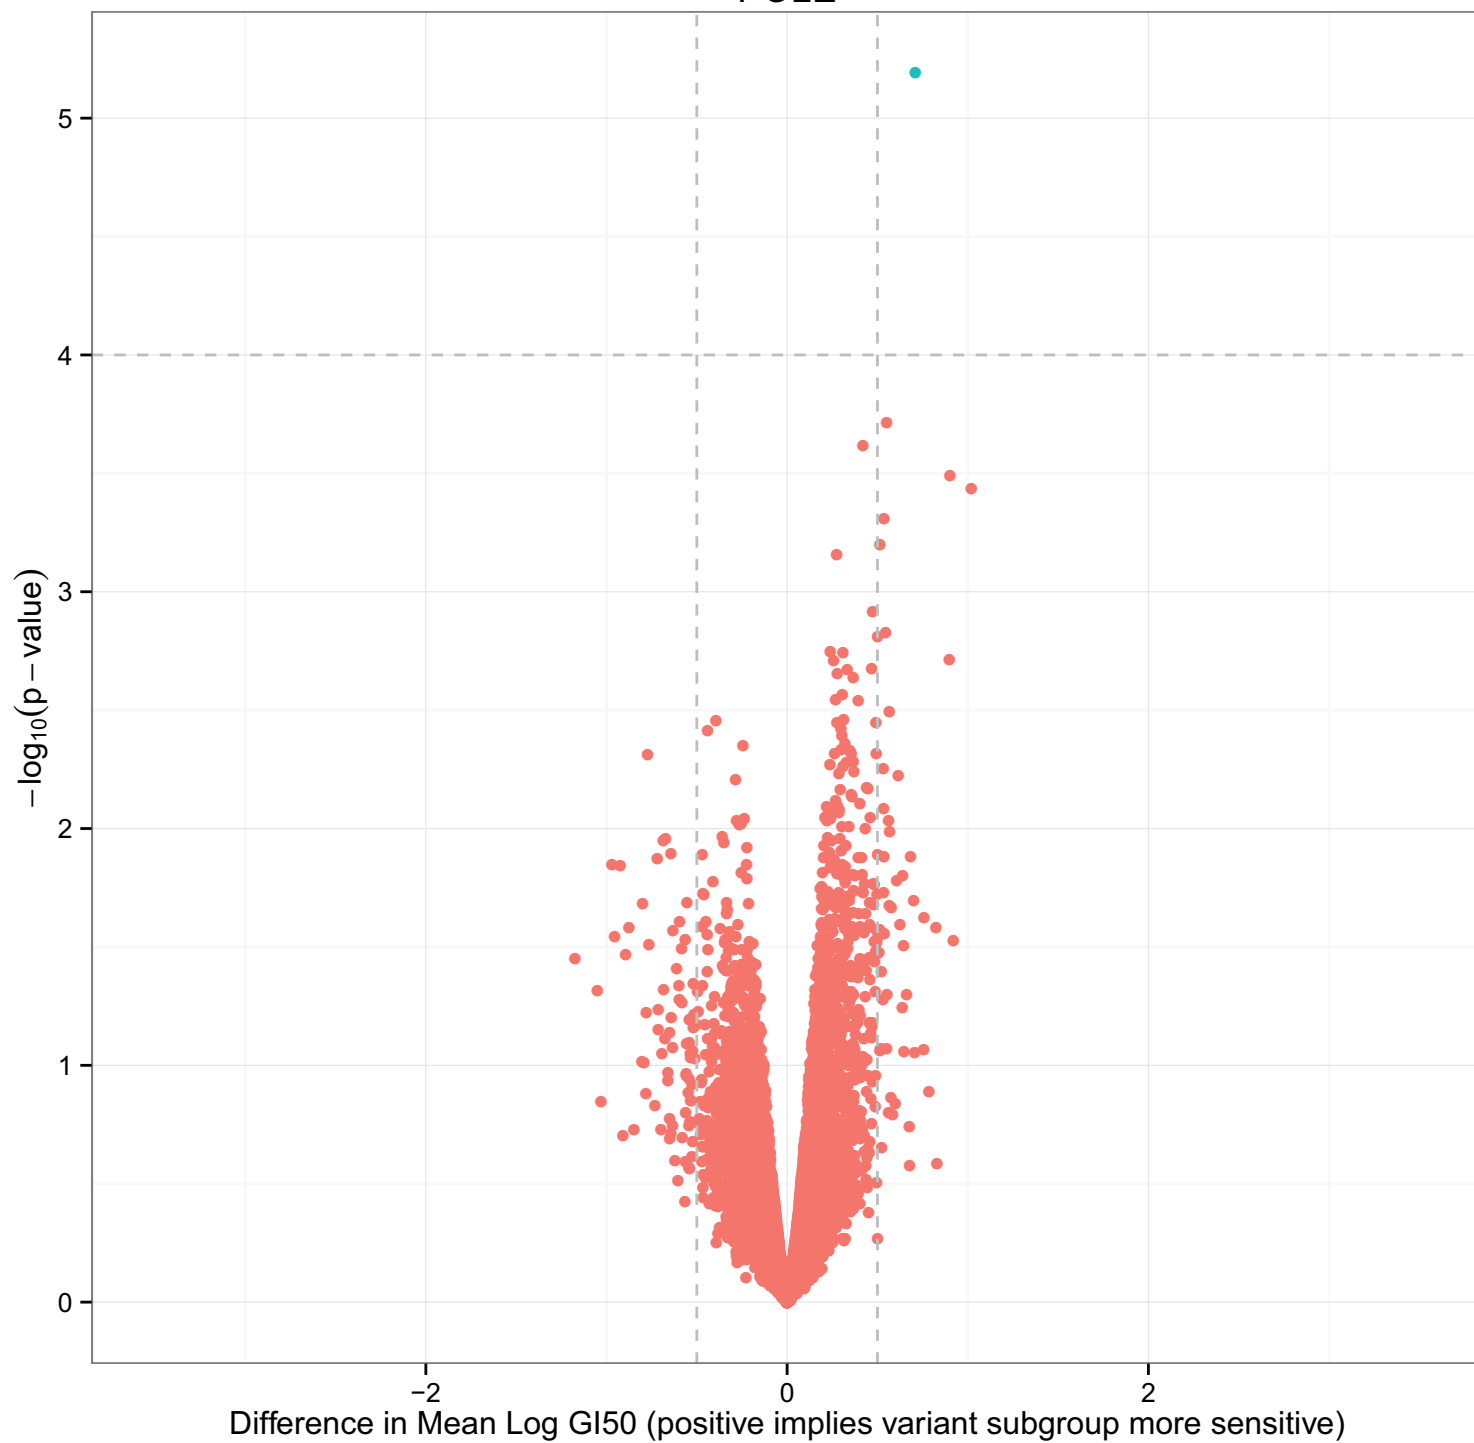



PTEN

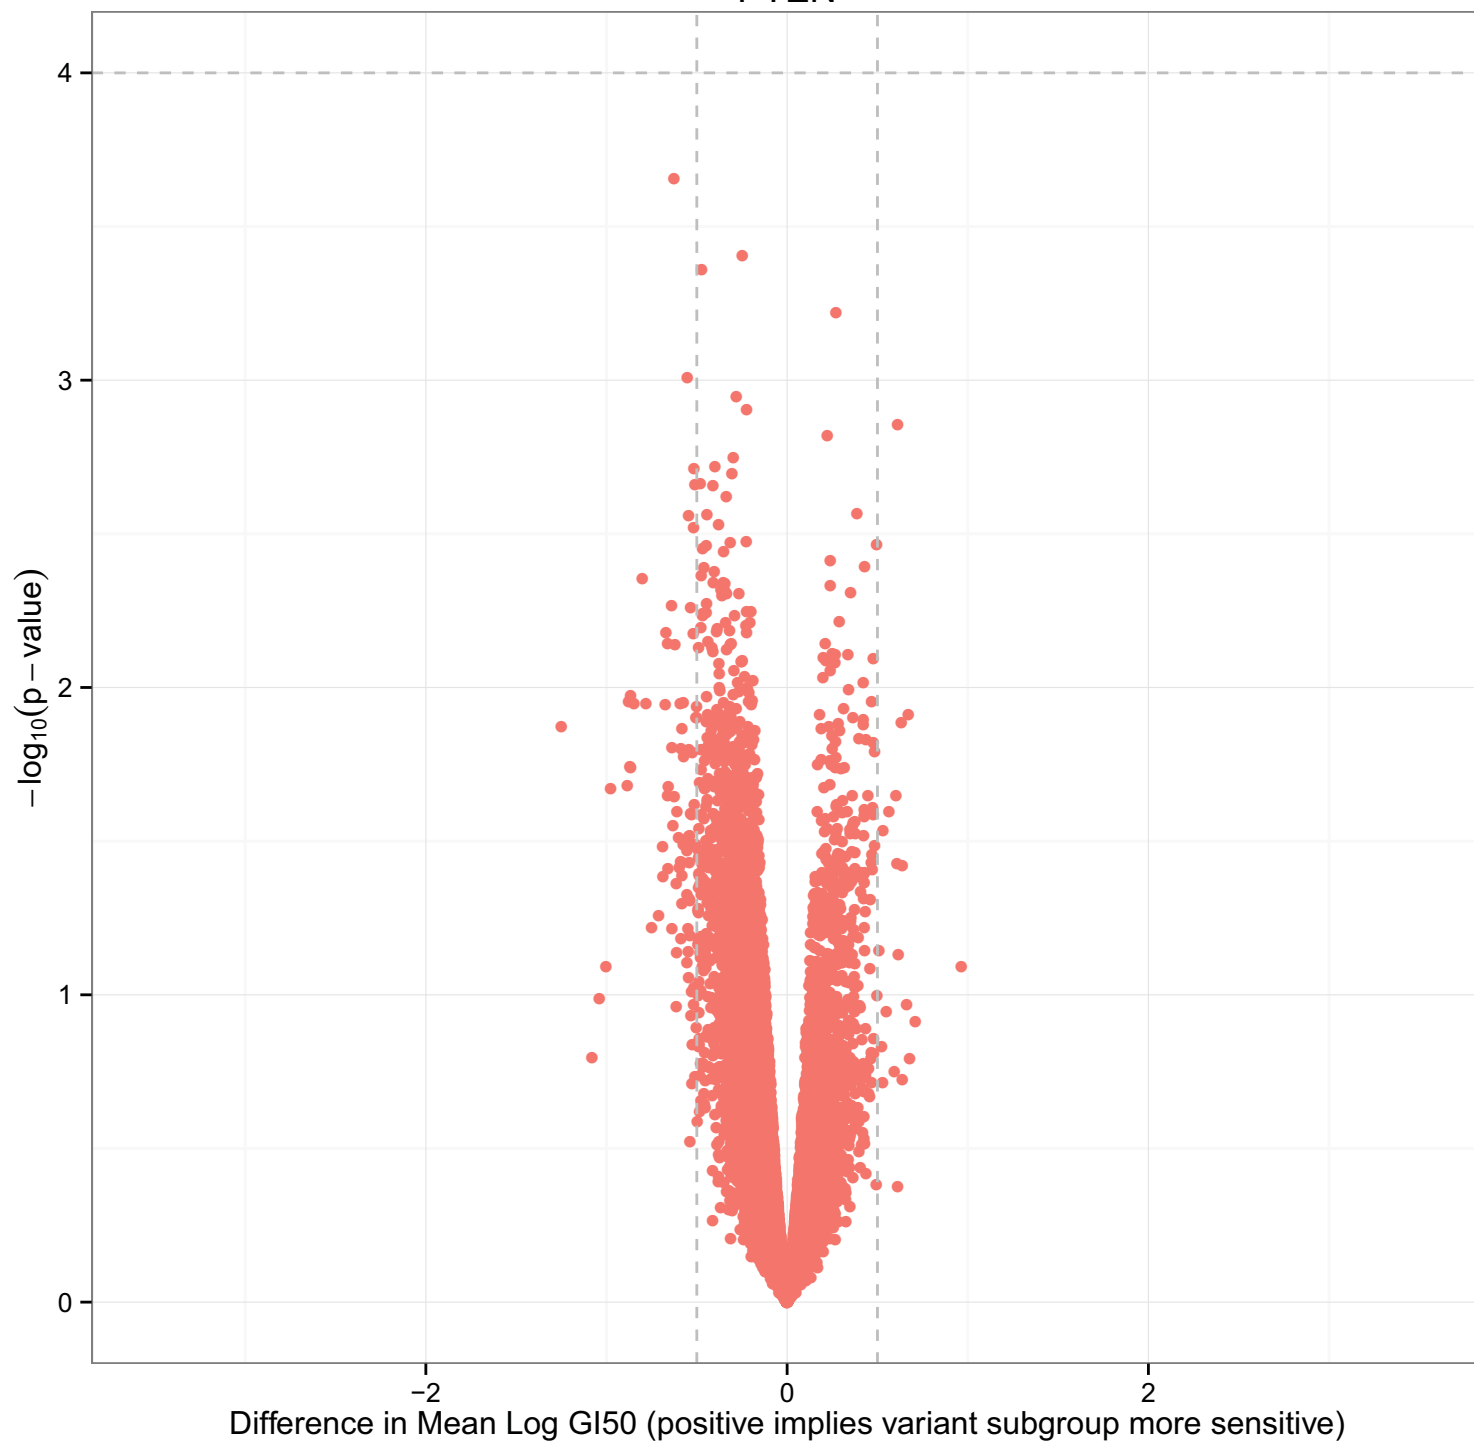

RET

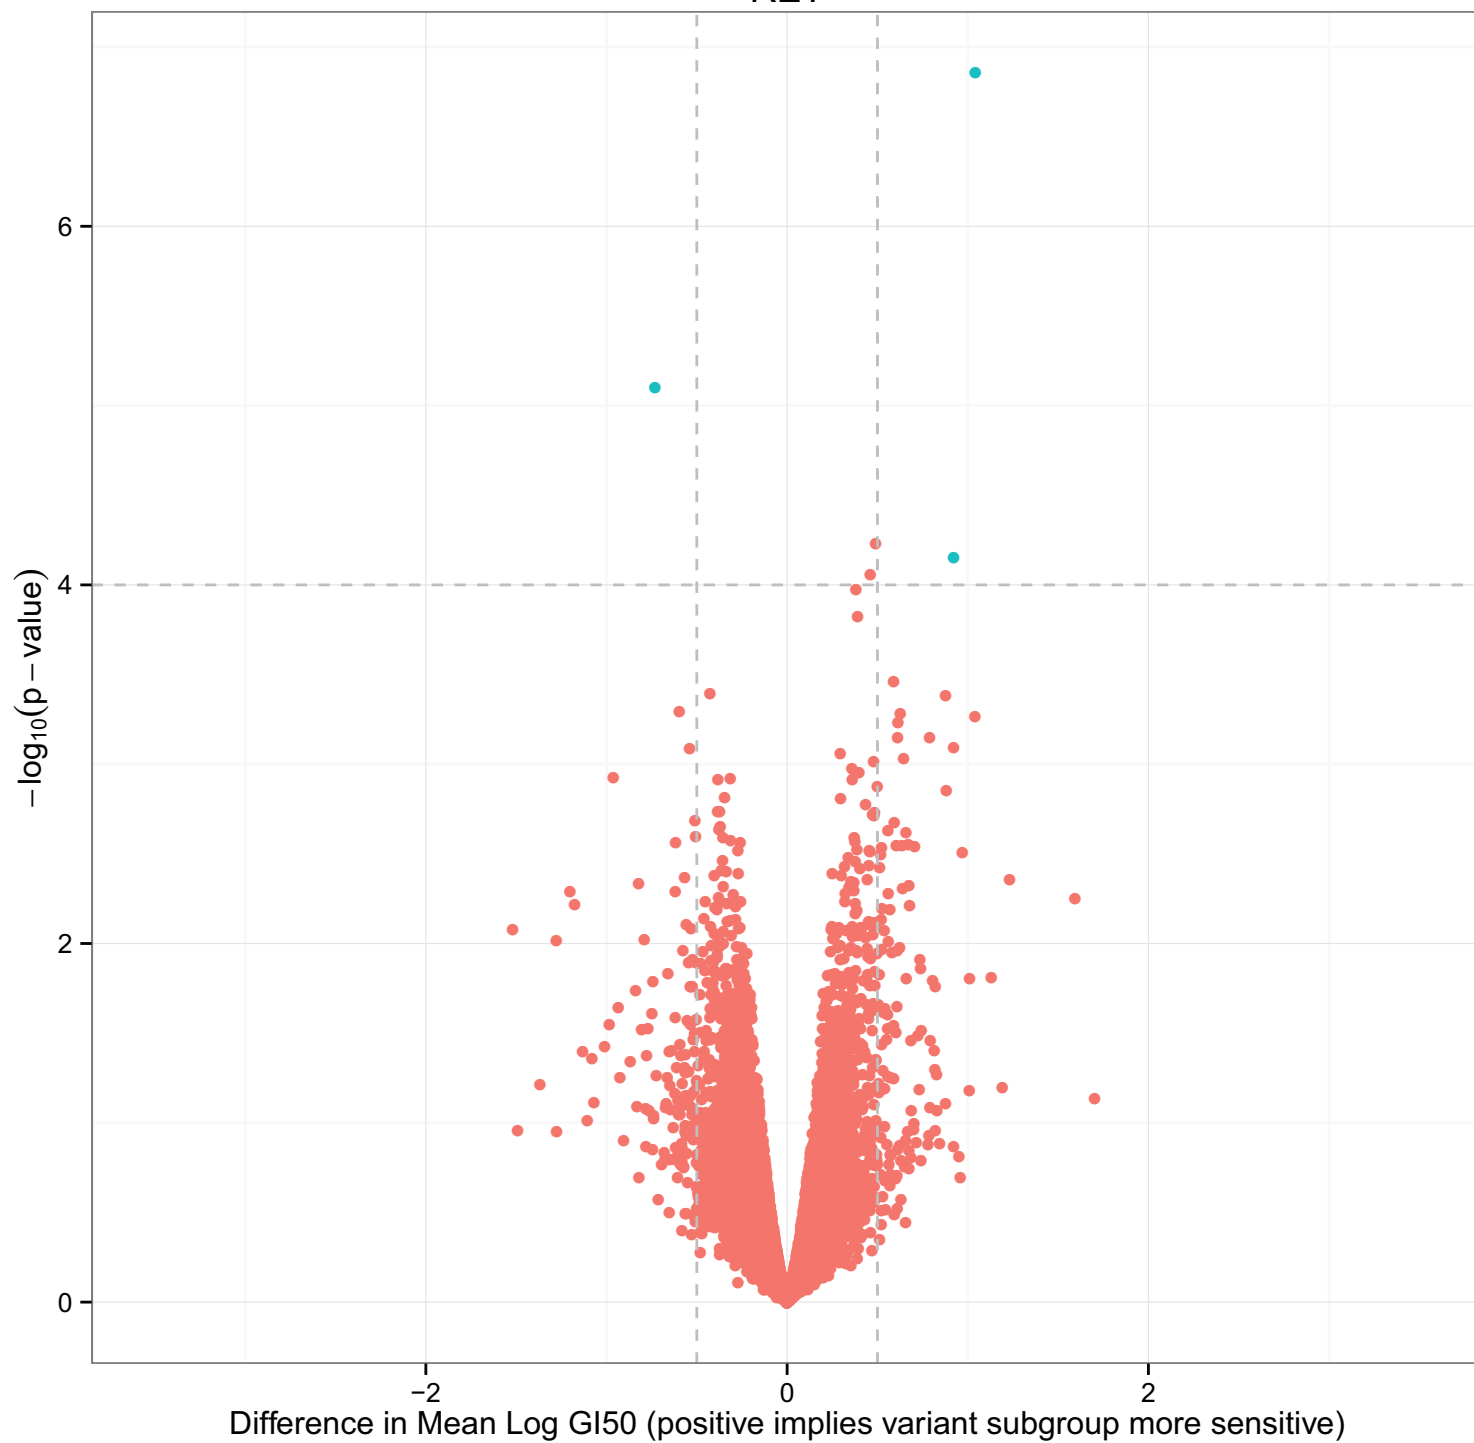

RETNLB

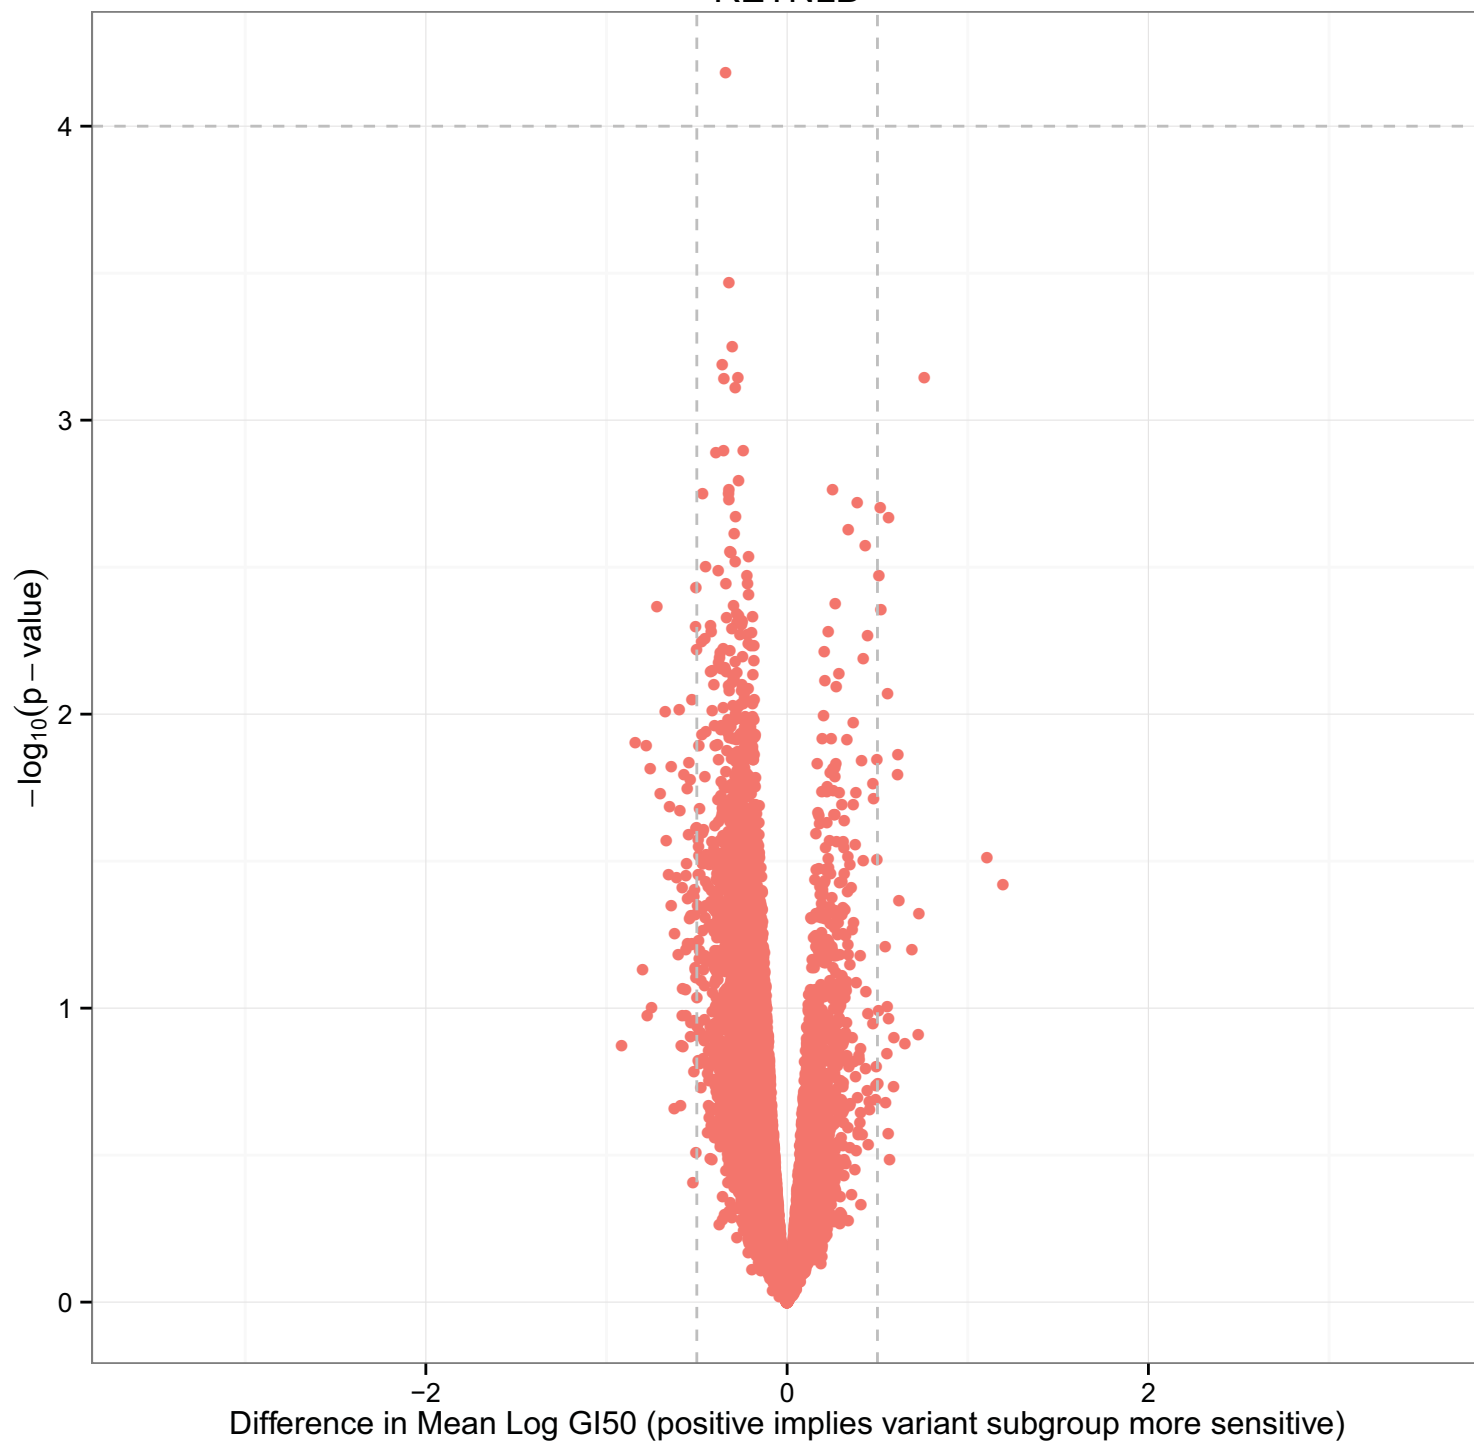

# SMARCA4

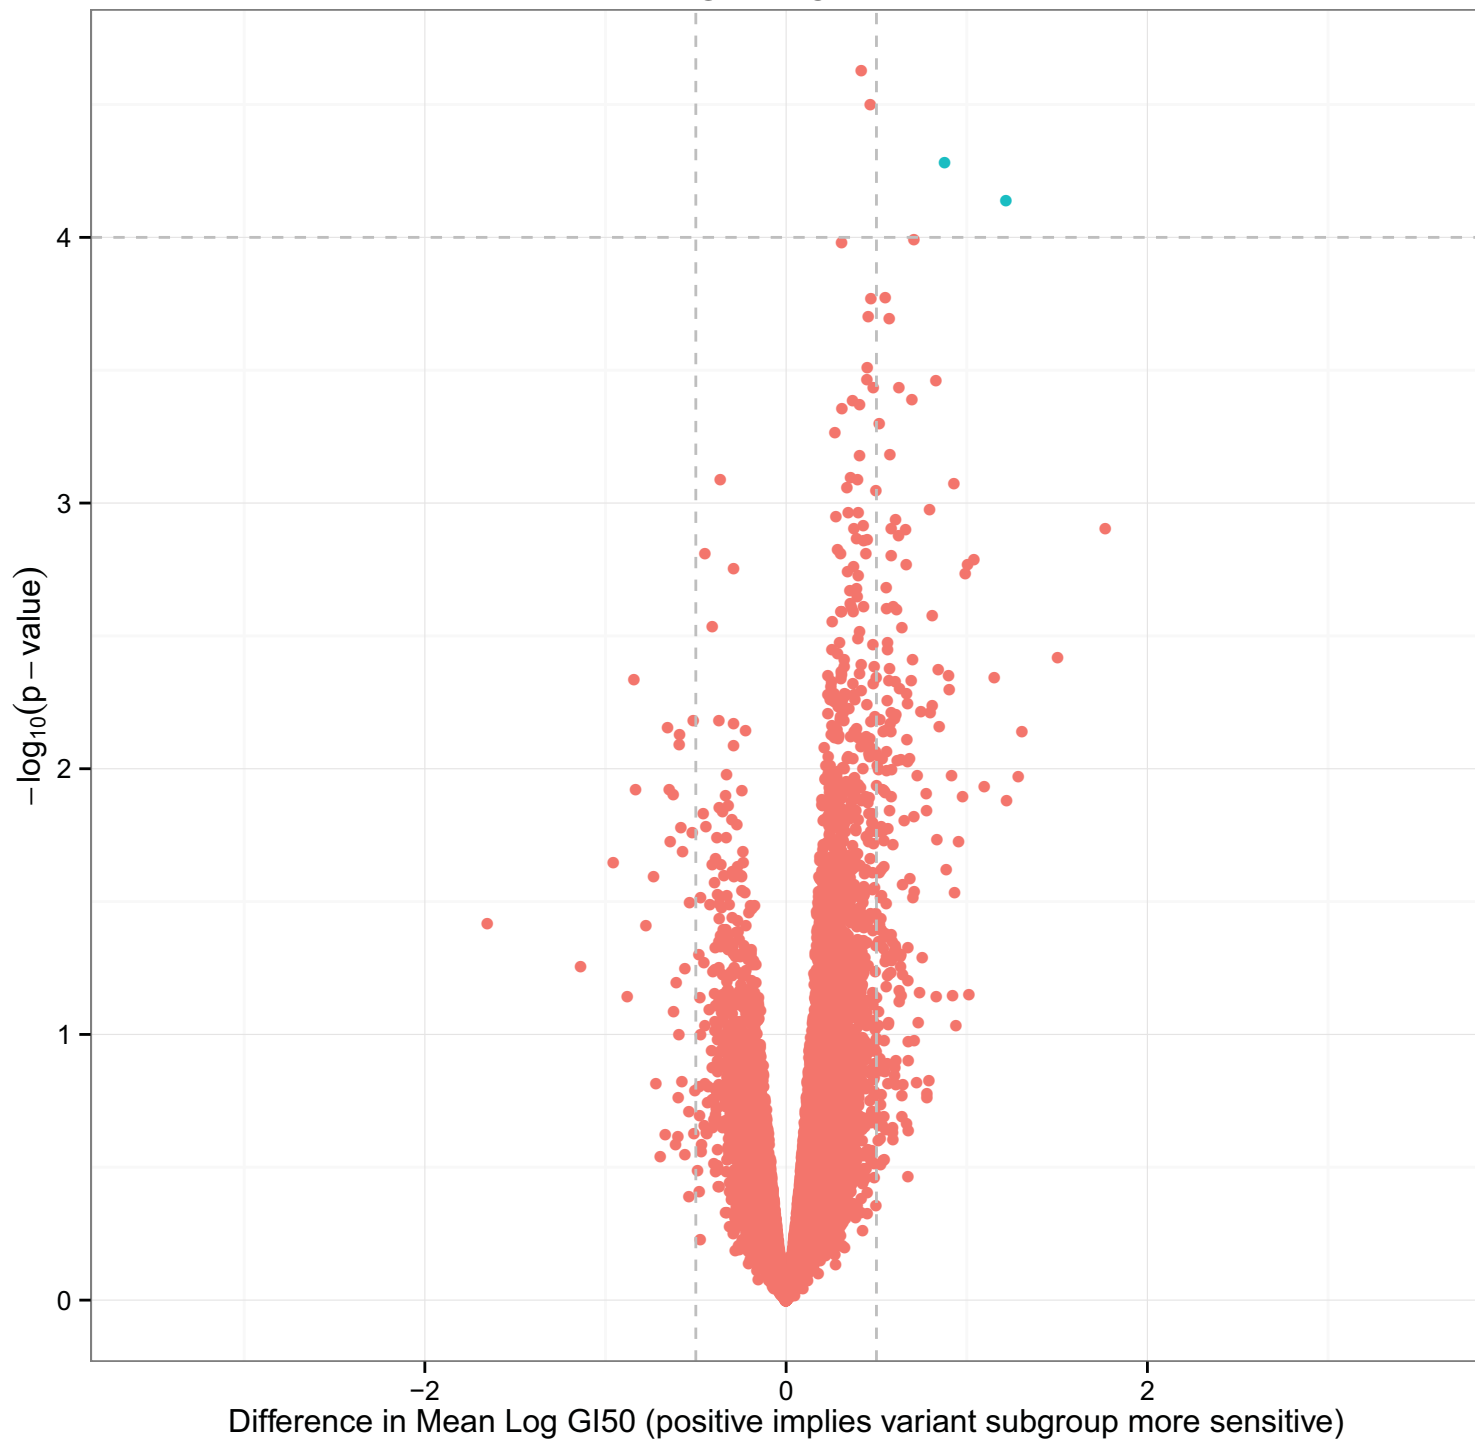

TP53

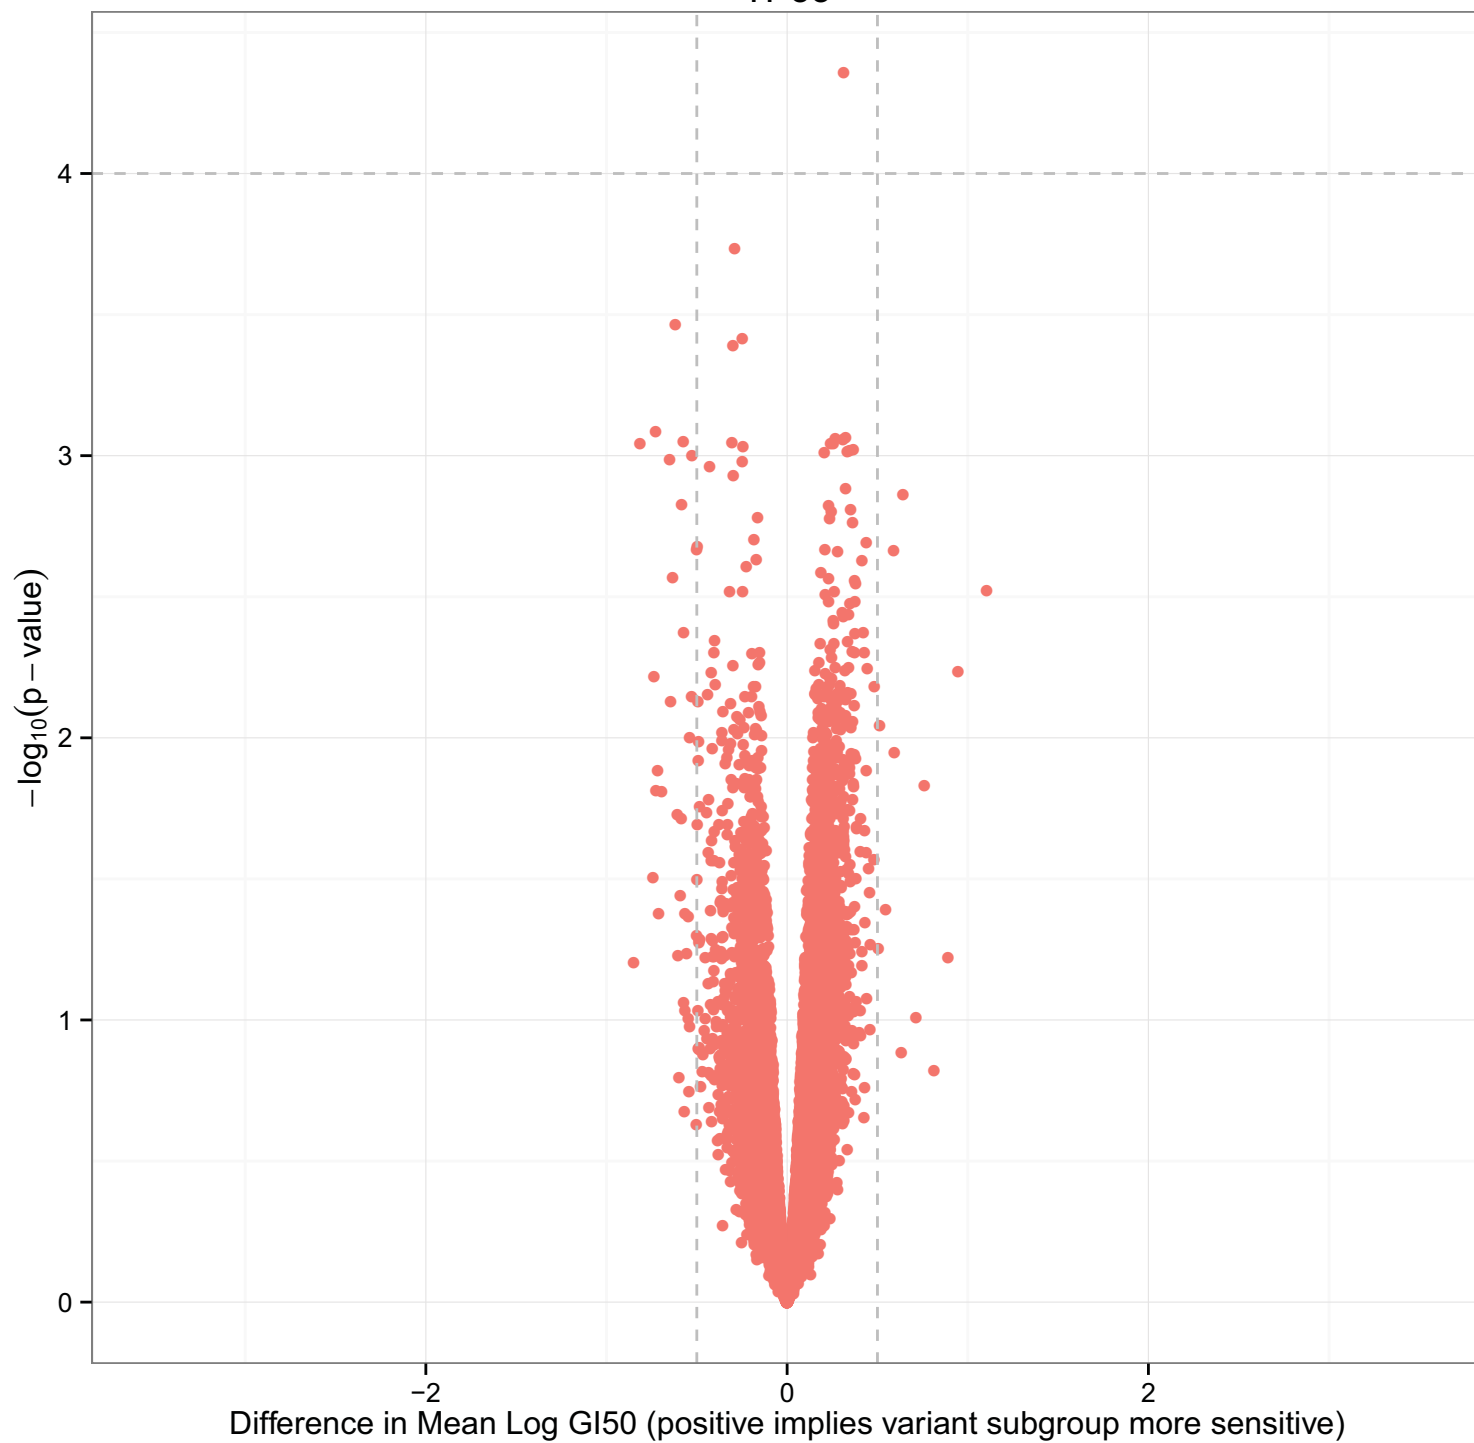

TSC2

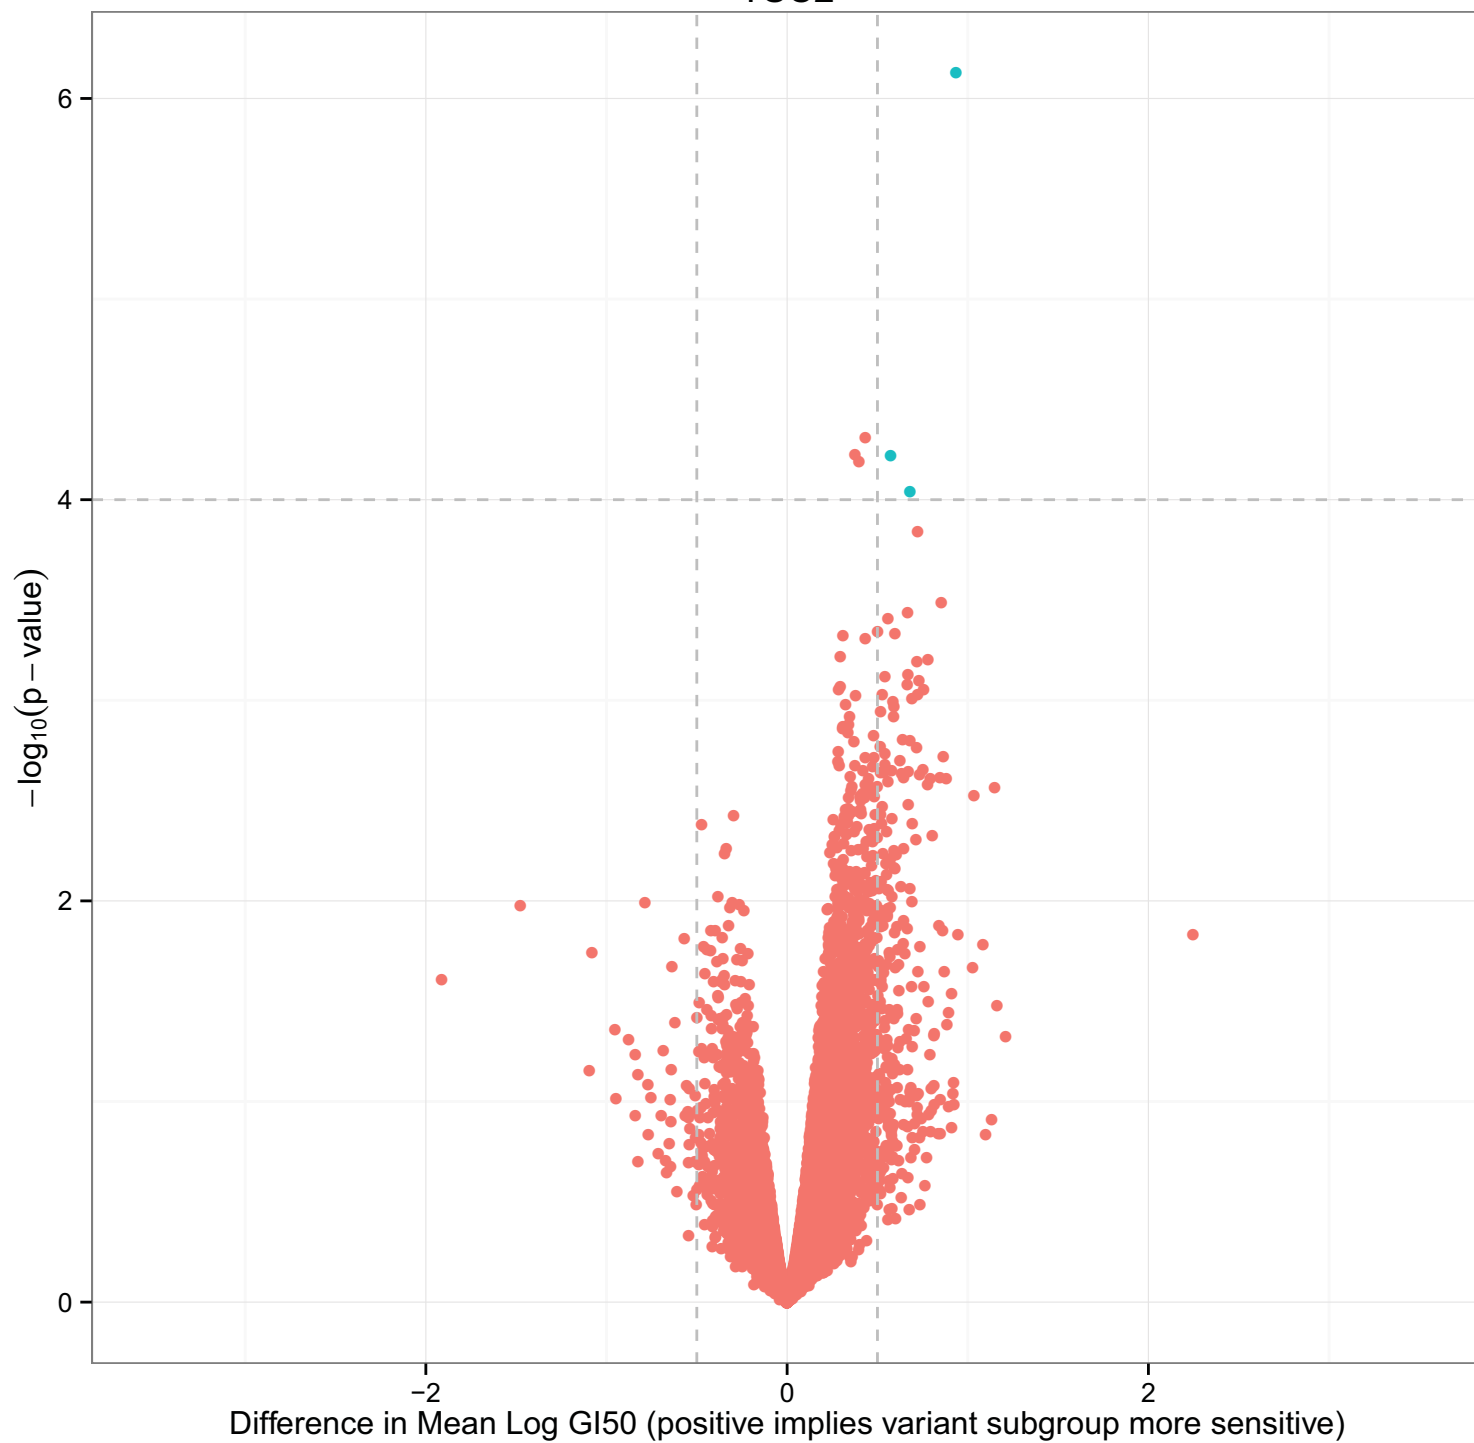

Supplement: 00085472can123342-sup-fig9.pdf [file 00085472can123342-sup-fig9.pdf]
