# Supplementary material for: The Exomes of the NCI-60 Panel: A Genomic Resource for Cancer Biology and Systems Pharmacology
Source: Oxford University Press journal article supplement (doi:10.1158/0008-5472.can-12-3342), 2013-07-15
Supplement: 00085472can123342-sup-tab1.xls [file 00085472can123342-sup-tab1.xls]

## Sheet: NSC670177
NSC #: 670177				William C. Reinhold					Data downloaded from the public CellMiner Website:
				NIH					http://discover.nci.nih.gov/cellminer
Not FDA Approved				Laboratory of Molecular Pharmacology
11-21-2012				Phone	301-496-9572				See Reinhold et al. 2012 Cancer Research 72: 3499-511
Total probes found: 1				FAX	301-402-0752				http://www.ncbi.nlm.nih.gov/pubmed/22802077
Probes that passed quality control: 1				wcr@mail.nih.gov
CellMiner Database Version: 1.4
cell lines	average z scores
BR:MCF7	-1.6
BR:MDA_MB_231	na
BR:HS578T	0.98
BR:BT_549	1.49
BR:T47D	na
CNS:SF_268	-0.18
CNS:SF_295	0.4
CNS:SF_539	na
CNS:SNB_19	-1.11
CNS:SNB_75	0.93
CNS:U251	1.04
CO:COLO205	-0.65
CO:HCC_2998	na
CO:HCT_116	-0.37
CO:HCT_15	0.62
CO:HT29	-0.5
CO:KM12	0.79
CO:SW_620	1.57
LE:CCRF_CEM	0.03
LE:HL_60	-0.15
LE:K_562	-1.6
LE:MOLT_4	-1.6
LE:RPMI_8226	-1.6
LE:SR	-1.2
ME:LOXIMVI	0.85
ME:MALME_3M	-1.44
ME:M14	0.02
ME:SK_MEL_2	-0.38
ME:SK_MEL_28	0.19
ME:SK_MEL_5	0.31
ME:UACC_257	-0.38
ME:UACC_62	0.44																	bins	Frequency in that bin
ME:MDA_MB_435	3.25																	3.6	0
ME:MDA_N	2.57																	3.9	9
LC:A549	-0.41																	4.2	20
LC:EKVX	-0.23																	4.5	17
LC:HOP_62	-0.51																	4.8	6
LC:HOP_92	-0.19																	5.1	1
LC:NCI_H226	0.09																	5.4	1
LC:NCI_H23	1																	5.7	0
LC:NCI_H322M	0.72																	6	0
LC:NCI_H460	-0.32
LC:NCI_H522	0.38
OV:IGROV1	-0.36														p 'Cell line average activities' are found in the last column of the Activities Table.
OV:OVCAR_3	-1.46
OV:OVCAR_4	-1.33
OV:OVCAR_5	-0.45
OV:OVCAR_8	-0.22
OV:SK_OV_3	0.67
OV:NCI_ADR_RES	0.56
PR:PC_3	1.12
PR:DU_145	-0.39
RE:786_0	-0.19
RE:A498	na
RE:ACHN	-0.06
RE:CAKI_1	-0.84
RE:RXF_393	na			Average negative log10 activities (not mean centered)
RE:SN12C	-0.56				across all experiments (based on rows 73-76)
RE:TK_10	0.05				Range k			1.52
RE:UO_31	0.23					Minimum l		4
						Maximum m		5.52
					Average n			4.5
					Standard Deviation o			0.31
				k Range calculated as the mean of drug activity derived from Joel Morris (DTP) data received Nov. 2010.
				l Minimum calculated as the mean of each experiment's minimum across cell lines (from the row 73 average activities).
				m Maximum calculated as the mean of each experiment's maximum across cell lines (from the row 74 average activities).
				n Average calculated as the mean of each experiment's average across cell lines (from the row 75 average activities).
				o Standard Deviation calculated as the mean of each experiment's atandard deviation across cell lines (from the row 76 average activities).
	Activities a		Cell line
	9407SR53		average activity i
BR:MCF7	4		4
BR:MDA_MB_231	-		-
BR:HS578T	4.81		4.81
BR:BT_549	4.97		4.97
BR:T47D	-		-
CNS:SF_268	4.44		4.44
CNS:SF_295	4.63		4.63
CNS:SF_539	-		-
CNS:SNB_19	4.15		4.15
CNS:SNB_75	4.79		4.79
CNS:U251	4.83		4.83
CO:COLO205	4.3		4.3
CO:HCC_2998	-		-
CO:HCT_116	4.39		4.39
CO:HCT_15	4.69		4.69
CO:HT29	4.34		4.34
CO:KM12	4.75		4.75
CO:SW_620	4.99		4.99
LE:CCRF_CEM	4.51		4.51
LE:HL_60	4.45		4.45
LE:K_562	4		4
LE:MOLT_4	4		4
LE:RPMI_8226	4		4
LE:SR	4.12		4.12
ME:LOXIMVI	4.76		4.76
ME:MALME_3M	4.05		4.05
ME:M14	4.51		4.51
ME:SK_MEL_2	4.38		4.38
ME:SK_MEL_28	4.56		4.56
ME:SK_MEL_5	4.6		4.6
ME:UACC_257	4.38		4.38
ME:UACC_62	4.64		4.64
ME:MDA_MB_435	5.52		5.52
ME:MDA_N	5.3		5.3
LC:A549	4.37		4.37
LC:EKVX	4.43		4.43
LC:HOP_62	4.34		4.34
LC:HOP_92	4.44		4.44
LC:NCI_H226	4.53		4.53
LC:NCI_H23	4.81		4.81
LC:NCI_H322M	4.72		4.72
LC:NCI_H460	4.4		4.4
LC:NCI_H522	4.62		4.62
OV:IGROV1	4.39		4.39
OV:OVCAR_3	4.05		4.05
OV:OVCAR_4	4.08		4.08
OV:OVCAR_5	4.36		4.36
OV:OVCAR_8	4.43		4.43
OV:SK_OV_3	4.71		4.71
OV:NCI_ADR_RES	4.68		4.68
PR:PC_3	4.85		4.85
PR:DU_145	4.38		4.38
RE:786_0	4.44		4.44
RE:A498	-		-
RE:ACHN	4.48		4.48
RE:CAKI_1	4.24		4.24
RE:RXF_393	-		-
RE:SN12C	4.33		4.33
RE:TK_10	4.51		4.51
RE:UO_31	4.57		4.57
Range b	1.52
Minumum c	4
Maximum d	5.52
Average e	4.5
Standard Deviation f	0.31
loghi g	0
a Drug activity derived from DTP data received Nov. 2010 from Joel Morris.
b Range calculated based on columns
c Minimum calculated based on columns
d Maximum calculated based on columns
e Average calculated based on columns
f Standard deviation calculated based on columns
g loghi provided by DPT
	Z scores		Z score
	9407SR53		average
BR:MCF7	4		-1.6
BR:MDA_MB_231	-
BR:HS578T	4.81		0.98
BR:BT_549	4.97		1.49
BR:T47D	-
CNS:SF_268	4.44		-0.18
CNS:SF_295	4.63		0.4
CNS:SF_539	-
CNS:SNB_19	4.15		-1.11
CNS:SNB_75	4.79		0.93
CNS:U251	4.83		1.04
CO:COLO205	4.3		-0.65
CO:HCC_2998	-
CO:HCT_116	4.39		-0.37
CO:HCT_15	4.69		0.62
CO:HT29	4.34		-0.5
CO:KM12	4.75		0.79
CO:SW_620	4.99		1.57
LE:CCRF_CEM	4.51		0.03
LE:HL_60	4.45		-0.15
LE:K_562	4		-1.6
LE:MOLT_4	4		-1.6
LE:RPMI_8226	4		-1.6
LE:SR	4.12		-1.2
ME:LOXIMVI	4.76		0.85
ME:MALME_3M	4.05		-1.44
ME:M14	4.51		0.02
ME:SK_MEL_2	4.38		-0.38
ME:SK_MEL_28	4.56		0.19
ME:SK_MEL_5	4.6		0.31
ME:UACC_257	4.38		-0.38
ME:UACC_62	4.64		0.44
ME:MDA_MB_435	5.52		3.25
ME:MDA_N	5.3		2.57
LC:A549	4.37		-0.41
LC:EKVX	4.43		-0.23
LC:HOP_62	4.34		-0.51
LC:HOP_92	4.44		-0.19
LC:NCI_H226	4.53		0.09
LC:NCI_H23	4.81		1
LC:NCI_H322M	4.72		0.72
LC:NCI_H460	4.4		-0.32
LC:NCI_H522	4.62		0.38
OV:IGROV1	4.39		-0.36
OV:OVCAR_3	4.05		-1.46
OV:OVCAR_4	4.08		-1.33
OV:OVCAR_5	4.36		-0.45
OV:OVCAR_8	4.43		-0.22
OV:SK_OV_3	4.71		0.67
OV:NCI_ADR_RES	4.68		0.56
PR:PC_3	4.85		1.12
PR:DU_145	4.38		-0.39
RE:786_0	4.44		-0.19
RE:A498	-
RE:ACHN	4.48		-0.06
RE:CAKI_1	4.24		-0.84
RE:RXF_393	-
RE:SN12C	4.33		-0.56
RE:TK_10	4.51		0.05
RE:UO_31	4.57		0.23
Range b	4.85
Minumum c	-1.6
Maximum d	3.25
Average e	0
Standard Deviation f	1
loghi g	0
a Drug activity derived from DTP data received Nov. 2010 from Joel Morris.
b Range calculated based on columns
c Minimum calculated based on columns
d Maximum calculated based on columns
e Average calculated based on columns
f Standard deviation calculated based on columns
g loghi provided by DPT
J See "Z score use rationale and description" notes below.
	Quality control description
In order to be included in our analysis, experiments must pass the following steps:
	1. Remove all experiments with less than 1.2 fold change (log10).
	2. Remove all experiments with information for <35 cell lines.
	3. There is a maximum of 253 experiments allowed.
	4. Count the number of experiments that were recognized for the drug of interest, and passed the 1.2 fold criteria.
	5. Calculate 25% of that value unless this value exceeds the maximum and then it is set to the maximum.
	6. Calculate correlations for all possible experiment/experiment combinations.
	7. Drop all experiments for which all correlations are less than 0.334.
	8. Determine the average correlation for each experiment to all other experiments.
	9. If there are experiments with average correlations less than 0.60, drop the (experiment) with the lowest average correlation.
	10. Continue this recalculation of average correlations (from step 8), followed by dropping the lowest experiment until:
		a. There are less than 253 experiments from (step 3) AND
		b. All experiment averages are above 0.60, or the number of remaining experiments reaches the 25% value calculated in step 5.
	Z score use rationale and description.
We have adopted the use of z scores to allow us to more accurately combine from multiple platforms. A description of z scores appears below.
Z scores are a special application of the transformation rules. The z score for an item, indicates how far and in what direction, that item deviates
from its distribution's mean, expressed in units of its distribution's standard deviation. The mathematics of the z score transformation are such that if
every item in a distribution is converted to its z score, the transformed scores will necessarily have a mean of zero and a standard deviation of one.
Z scores are sometimes called "standard scores". The z score transformation is especially useful when seeking to compare the relative standings
of items from distributions with different means and/or different standard deviations.
Z scores are especially informative when the distribution to which they refer, is normal. In every normal distribution, the distance between the mean
and a given z score cuts off a fixed proportion of the total area under the curve.
The above description is reproduced from: http://www.sysurvey.com/tips/statistics/zscore.htm
Z scores are determined for each experiment/cell line pair by the subtraction from its intensity by the experiment mean (across the 60 cell lines),
and division by the standard deviation of the experiment (across the 60 cell lines). The z score average was then calculated as the mean
across all experiments that passed quality control criteria.

## Sheet: NSC706829
NSC #: 706829				William C. Reinhold					Data downloaded from the public CellMiner Website:
1,6-Bis[4-(4-aminophenoxy)phenyl]diamantane				NIH					http://discover.nci.nih.gov/cellminer
Not FDA Approved				Laboratory of Molecular Pharmacology
12-09-2012				Phone	301-496-9572				See Reinhold et al. 2012 Cancer Research 72: 3499-511
Total probes found: 2				FAX	301-402-0752				http://www.ncbi.nlm.nih.gov/pubmed/22802077
Probes that passed quality control: 2				wcr@mail.nih.gov
CellMiner Database Version: 1.4
cell lines	average z scores
BR:MCF7	-0.92
BR:MDA_MB_231	-0.13
BR:HS578T	-0.66
BR:BT_549	-0.88
BR:T47D	-0.03
CNS:SF_268	-0.58
CNS:SF_295	-0.66
CNS:SF_539	na
CNS:SNB_19	-0.03
CNS:SNB_75	na
CNS:U251	0.53
CO:COLO205	3.84
CO:HCC_2998	-0.41
CO:HCT_116	0.01
CO:HCT_15	-0.6
CO:HT29	-0.1
CO:KM12	-0.54
CO:SW_620	-0.53
LE:CCRF_CEM	-0.38
LE:HL_60	0.11
LE:K_562	-0.12
LE:MOLT_4	0.04
LE:RPMI_8226	-0.28
LE:SR	-0.55
ME:LOXIMVI	-0.54
ME:MALME_3M	2.42
ME:M14	1.75
ME:SK_MEL_2	0.45
ME:SK_MEL_28	1.66
ME:SK_MEL_5	1.78
ME:UACC_257	2.14
ME:UACC_62	0.75																	bins	Frequency in that bin
ME:MDA_MB_435	2.03																	4	4
ME:MDA_N	2.12																	4.5	31
LC:A549	-0.24																	5	11
LC:EKVX	-0.21																	5.5	4
LC:HOP_62	-0.5																	6	6
LC:HOP_92	0.7																	6.5	1
LC:NCI_H226	-0.61																	7	0
LC:NCI_H23	-0.69																	7.5	0
LC:NCI_H322M	-0.23																	8	1
LC:NCI_H460	-0.57
LC:NCI_H522	-0.24
OV:IGROV1	-0.64														p 'Cell line average activities' are found in the last column of the Activities Table.
OV:OVCAR_3	0.07
OV:OVCAR_4	-0.21
OV:OVCAR_5	-1.58
OV:OVCAR_8	-0.83
OV:SK_OV_3	-0.58
OV:NCI_ADR_RES	-1.37
PR:PC_3	0.01
PR:DU_145	-0.12
RE:786_0	-0.28
RE:A498	-0.6
RE:ACHN	0.66
RE:CAKI_1	-0.51
RE:RXF_393	-0.48			Average negative log10 activities (not mean centered)
RE:SN12C	-0.72				across all experiments (based on rows 73-76)
RE:TK_10	-0.55				Range k			3.35
RE:UO_31	-0.02					Minimum l		4
						Maximum m		7.35
					Average n			5.06
					Standard Deviation o			0.67
				k Range calculated as the mean of drug activity derived from Joel Morris (DTP) data received Nov. 2010.
				l Minimum calculated as the mean of each experiment's minimum across cell lines (from the row 73 average activities).
				m Maximum calculated as the mean of each experiment's maximum across cell lines (from the row 74 average activities).
				n Average calculated as the mean of each experiment's average across cell lines (from the row 75 average activities).
				o Standard Deviation calculated as the mean of each experiment's atandard deviation across cell lines (from the row 76 average activities).
	Activities a			Cell line
	9812MD90	9902RS09		average activity i
BR:MCF7	4.43	4.45		4.44
BR:MDA_MB_231	5.04	-		5.04
BR:HS578T	4.41	4.78		4.59
BR:BT_549	4.39	4.54		4.46
BR:T47D	5.07	5.01		5.04
CNS:SF_268	4.43	4.86		4.65
CNS:SF_295	4.68	4.57		4.62
CNS:SF_539	-	-		-
CNS:SNB_19	4.89	5.15		5.02
CNS:SNB_75	-	-		-
CNS:U251	5.54	-		5.54
CO:COLO205	8	-		8
CO:HCC_2998	-	4.74		4.74
CO:HCT_116	5.2	4.95		5.07
CO:HCT_15	4.68	4.64		4.66
CO:HT29	5.03	4.95		4.99
CO:KM12	4.85	4.57		4.71
CO:SW_620	4.74	4.67		4.7
LE:CCRF_CEM	4.88	4.74		4.81
LE:HL_60	5.32	4.97		5.15
LE:K_562	5.14	4.84		4.99
LE:MOLT_4	5.26	4.94		5.1
LE:RPMI_8226	5.05	4.72		4.89
LE:SR	-	4.66		4.66
ME:LOXIMVI	4.71	4.69		4.7
ME:MALME_3M	6.64	6.69		6.67
ME:M14	6.32	6.15		6.23
ME:SK_MEL_2	5.36	5.36		5.36
ME:SK_MEL_28	5.95	6.35		6.15
ME:SK_MEL_5	6.3	6.2		6.25
ME:UACC_257	6.5	6.47		6.48
ME:UACC_62	5.6	5.53		5.56
ME:MDA_MB_435	6.59	6.26		6.43
ME:MDA_N	6.56	6.39		6.48
LC:A549	4.95	4.85		4.9
LC:EKVX	5.17	4.71		4.94
LC:HOP_62	4.85	4.63		4.74
LC:HOP_92	5.68	5.4		5.54
LC:NCI_H226	4.59	4.7		4.64
LC:NCI_H23	4.43	4.72		4.58
LC:NCI_H322M	4.92	4.89		4.91
LC:NCI_H460	4.59	4.75		4.67
LC:NCI_H522	4.87	4.92		4.89
OV:IGROV1	4.58	4.67		4.62
OV:OVCAR_3	5.19	-		5.19
OV:OVCAR_4	5.28	4.63		4.95
OV:OVCAR_5	4	4		4
OV:OVCAR_8	4.44	4.55		4.5
OV:SK_OV_3	-	4.64		4.64
OV:NCI_ADR_RES	4	4.25		4.13
PR:PC_3	5.28	4.88		5.08
PR:DU_145	5.05	-		5.05
RE:786_0	4.92	4.82		4.87
RE:A498	4.65	4.66		4.65
RE:ACHN	5.54	5.46		5.5
RE:CAKI_1	4.77	4.67		4.72
RE:RXF_393	4.66	4.8		4.73
RE:SN12C	4.8	4.4		4.6
RE:TK_10	4.43	4.9		4.66
RE:UO_31	5.42	4.73		5.08
Range b	4	2.69
Minumum c	4	4
Maximum d	8	6.69
Average e	5.14	4.99
Standard Deviation f	0.74	0.6
loghi g	0	0
a Drug activity derived from DTP data received Nov. 2010 from Joel Morris.
b Range calculated based on columns
c Minimum calculated based on columns
d Maximum calculated based on columns
e Average calculated based on columns
f Standard deviation calculated based on columns
g loghi provided by DPT
	Z scores			Z score
	9812MD90	9902RS09		average
BR:MCF7	4.43	4.45		-0.92
BR:MDA_MB_231	5.04	-		-0.13
BR:HS578T	4.41	4.78		-0.66
BR:BT_549	4.39	4.54		-0.88
BR:T47D	5.07	5.01		-0.03
CNS:SF_268	4.43	4.86		-0.58
CNS:SF_295	4.68	4.57		-0.66
CNS:SF_539	-	-
CNS:SNB_19	4.89	5.15		-0.03
CNS:SNB_75	-	-
CNS:U251	5.54	-		0.53
CO:COLO205	8	-		3.84
CO:HCC_2998	-	4.74		-0.41
CO:HCT_116	5.2	4.95		0.01
CO:HCT_15	4.68	4.64		-0.6
CO:HT29	5.03	4.95		-0.1
CO:KM12	4.85	4.57		-0.54
CO:SW_620	4.74	4.67		-0.53
LE:CCRF_CEM	4.88	4.74		-0.38
LE:HL_60	5.32	4.97		0.11
LE:K_562	5.14	4.84		-0.12
LE:MOLT_4	5.26	4.94		0.04
LE:RPMI_8226	5.05	4.72		-0.28
LE:SR	-	4.66		-0.55
ME:LOXIMVI	4.71	4.69		-0.54
ME:MALME_3M	6.64	6.69		2.42
ME:M14	6.32	6.15		1.75
ME:SK_MEL_2	5.36	5.36		0.45
ME:SK_MEL_28	5.95	6.35		1.66
ME:SK_MEL_5	6.3	6.2		1.78
ME:UACC_257	6.5	6.47		2.14
ME:UACC_62	5.6	5.53		0.75
ME:MDA_MB_435	6.59	6.26		2.03
ME:MDA_N	6.56	6.39		2.12
LC:A549	4.95	4.85		-0.24
LC:EKVX	5.17	4.71		-0.21
LC:HOP_62	4.85	4.63		-0.5
LC:HOP_92	5.68	5.4		0.7
LC:NCI_H226	4.59	4.7		-0.61
LC:NCI_H23	4.43	4.72		-0.69
LC:NCI_H322M	4.92	4.89		-0.23
LC:NCI_H460	4.59	4.75		-0.57
LC:NCI_H522	4.87	4.92		-0.24
OV:IGROV1	4.58	4.67		-0.64
OV:OVCAR_3	5.19	-		0.07
OV:OVCAR_4	5.28	4.63		-0.21
OV:OVCAR_5	4	4		-1.58
OV:OVCAR_8	4.44	4.55		-0.83
OV:SK_OV_3	-	4.64		-0.58
OV:NCI_ADR_RES	4	4.25		-1.37
PR:PC_3	5.28	4.88		0.01
PR:DU_145	5.05	-		-0.12
RE:786_0	4.92	4.82		-0.28
RE:A498	4.65	4.66		-0.6
RE:ACHN	5.54	5.46		0.66
RE:CAKI_1	4.77	4.67		-0.51
RE:RXF_393	4.66	4.8		-0.48
RE:SN12C	4.8	4.4		-0.72
RE:TK_10	4.43	4.9		-0.55
RE:UO_31	5.42	4.73		-0.02
Range b	5.37	4.46
Minumum c	-1.53	-1.64
Maximum d	3.84	2.82
Average e	0	0
Standard Deviation f	1	1
loghi g	0	0
a Drug activity derived from DTP data received Nov. 2010 from Joel Morris.
b Range calculated based on columns
c Minimum calculated based on columns
d Maximum calculated based on columns
e Average calculated based on columns
f Standard deviation calculated based on columns
g loghi provided by DPT
J See "Z score use rationale and description" notes below.
	Quality control description
In order to be included in our analysis, experiments must pass the following steps:
	1. Remove all experiments with less than 1.2 fold change (log10).
	2. Remove all experiments with information for <35 cell lines.
	3. There is a maximum of 253 experiments allowed.
	4. Count the number of experiments that were recognized for the drug of interest, and passed the 1.2 fold criteria.
	5. Calculate 25% of that value unless this value exceeds the maximum and then it is set to the maximum.
	6. Calculate correlations for all possible experiment/experiment combinations.
	7. Drop all experiments for which all correlations are less than 0.334.
	8. Determine the average correlation for each experiment to all other experiments.
	9. If there are experiments with average correlations less than 0.60, drop the (experiment) with the lowest average correlation.
	10. Continue this recalculation of average correlations (from step 8), followed by dropping the lowest experiment until:
		a. There are less than 253 experiments from (step 3) AND
		b. All experiment averages are above 0.60, or the number of remaining experiments reaches the 25% value calculated in step 5.
	Z score use rationale and description.
We have adopted the use of z scores to allow us to more accurately combine from multiple platforms. A description of z scores appears below.
Z scores are a special application of the transformation rules. The z score for an item, indicates how far and in what direction, that item deviates
from its distribution's mean, expressed in units of its distribution's standard deviation. The mathematics of the z score transformation are such that if
every item in a distribution is converted to its z score, the transformed scores will necessarily have a mean of zero and a standard deviation of one.
Z scores are sometimes called "standard scores". The z score transformation is especially useful when seeking to compare the relative standings
of items from distributions with different means and/or different standard deviations.
Z scores are especially informative when the distribution to which they refer, is normal. In every normal distribution, the distance between the mean
and a given z score cuts off a fixed proportion of the total area under the curve.
The above description is reproduced from: http://www.sysurvey.com/tips/statistics/zscore.htm
Z scores are determined for each experiment/cell line pair by the subtraction from its intensity by the experiment mean (across the 60 cell lines),
and division by the standard deviation of the experiment (across the 60 cell lines). The z score average was then calculated as the mean
across all experiments that passed quality control criteria.

## Sheet: NSC46061
NSC #: 46061				William C. Reinhold					Data downloaded from the public CellMiner Website:
Butanedioic acid, compd. with 10-[3-(4-methyl-1-piperazinyl)propyl]-2-(trifluoromethyl)-10H-phenothiazine (2:1)				NIH					http://discover.nci.nih.gov/cellminer
Not FDA Approved				Laboratory of Molecular Pharmacology
12-09-2012				Phone	301-496-9572				See Reinhold et al. 2012 Cancer Research 72: 3499-511
Total probes found: 3				FAX	301-402-0752				http://www.ncbi.nlm.nih.gov/pubmed/22802077
Probes that passed quality control: 2				wcr@mail.nih.gov
CellMiner Database Version: 1.4
cell lines	average z scores
BR:MCF7	na
BR:MDA_MB_231	1.45
BR:HS578T	0.24
BR:BT_549	-1.31
BR:T47D	-0.83
CNS:SF_268	-0.67
CNS:SF_295	-0.22
CNS:SF_539	-0.23
CNS:SNB_19	-0.99
CNS:SNB_75	0.31
CNS:U251	-0.08
CO:COLO205	0.71
CO:HCC_2998	0.82
CO:HCT_116	-0.13
CO:HCT_15	-0.48
CO:HT29	1.69
CO:KM12	0.41
CO:SW_620	-0.1
LE:CCRF_CEM	-0.04
LE:HL_60	0.15
LE:K_562	0.2
LE:MOLT_4	0.71
LE:RPMI_8226	0.02
LE:SR	-0.66
ME:LOXIMVI	0.9
ME:MALME_3M	1.26
ME:M14	1.95
ME:SK_MEL_2	0.21
ME:SK_MEL_28	1.95
ME:SK_MEL_5	0.75
ME:UACC_257	1.45
ME:UACC_62	1.7																	bins	Frequency in that bin
ME:MDA_MB_435	0.58																	4.1	0
ME:MDA_N	0.48																	4.4	0
LC:A549	-0.69																	4.7	23
LC:EKVX	-1.02																	5	16
LC:HOP_62	-0.84																	5.3	13
LC:HOP_92	-0.13																	5.6	6
LC:NCI_H226	-1.06																	5.9	0
LC:NCI_H23	-0.85																	6.2	0
LC:NCI_H322M	-0.67																	6.5	0
LC:NCI_H460	1.16
LC:NCI_H522	-0.81
OV:IGROV1	-0.76														p 'Cell line average activities' are found in the last column of the Activities Table.
OV:OVCAR_3	-0.62
OV:OVCAR_4	-0.84
OV:OVCAR_5	-0.3
OV:OVCAR_8	-1.08
OV:SK_OV_3	-1.02
OV:NCI_ADR_RES	-1.02
PR:PC_3	0.13
PR:DU_145	-1.47
RE:786_0	-0.63
RE:A498	-0.57
RE:ACHN	-0.66
RE:CAKI_1	na
RE:RXF_393	0.78			Average negative log10 activities (not mean centered)
RE:SN12C	-0.68				across all experiments (based on rows 73-76)
RE:TK_10	-0.53				Range k			1.28
RE:UO_31	0.36					Minimum l		4.63
						Maximum m		5.9
					Average n			5.15
					Standard Deviation o			0.32
				k Range calculated as the mean of drug activity derived from Joel Morris (DTP) data received Nov. 2010.
				l Minimum calculated as the mean of each experiment's minimum across cell lines (from the row 73 average activities).
				m Maximum calculated as the mean of each experiment's maximum across cell lines (from the row 74 average activities).
				n Average calculated as the mean of each experiment's average across cell lines (from the row 75 average activities).
				o Standard Deviation calculated as the mean of each experiment's atandard deviation across cell lines (from the row 76 average activities).
	Activities a			Cell line
	9206NS14	9302ES18		average activity i
BR:MCF7	-	-		-
BR:MDA_MB_231	-	5.77		5.77
BR:HS578T	-	5.36		5.36
BR:BT_549	-	4.84		4.84
BR:T47D	-	5		5
CNS:SF_268	4.89	4.97		4.93
CNS:SF_295	4.8	5.36		5.08
CNS:SF_539	4.83	5.32		5.08
CNS:SNB_19	4.73	4.93		4.83
CNS:SNB_75	5.24	5.24		5.24
CNS:U251	4.92	5.34		5.13
CO:COLO205	4.97	5.8		5.39
CO:HCC_2998	5.08	5.75		5.42
CO:HCT_116	4.93	5.28		5.11
CO:HCT_15	4.89	5.1		4.99
CO:HT29	5.65	5.7		5.68
CO:KM12	4.96	5.62		5.29
CO:SW_620	4.87	5.37		5.12
LE:CCRF_CEM	4.74	5.56		5.15
LE:HL_60	5.25	5.11		5.18
LE:K_562	4.47	6.03		5.25
LE:MOLT_4	5.31	5.42		5.37
LE:RPMI_8226	-	5.29		5.29
LE:SR	4.91	4.95		4.93
ME:LOXIMVI	5.13	5.76		5.44
ME:MALME_3M	5.41	5.68		5.55
ME:M14	5.74	5.78		5.76
ME:SK_MEL_2	4.95	5.48		5.22
ME:SK_MEL_28	5.78	5.74		5.76
ME:SK_MEL_5	5.03	5.76		5.4
ME:UACC_257	5.49	5.73		5.61
ME:UACC_62	5.69	5.66		5.68
ME:MDA_MB_435	-	5.48		5.48
ME:MDA_N	-	5.44		5.44
LC:A549	4.85	5		4.92
LC:EKVX	4.82	4.81		4.81
LC:HOP_62	4.85	4.9		4.87
LC:HOP_92	5.14	5.05		5.09
LC:NCI_H226	4.75	4.86		4.81
LC:NCI_H23	4.79	4.95		4.87
LC:NCI_H322M	4.87	4.99		4.93
LC:NCI_H460	5.35	5.68		5.52
LC:NCI_H522	4.81	4.97		4.89
OV:IGROV1	4.83	4.97		4.9
OV:OVCAR_3	4.82	-		4.82
OV:OVCAR_4	4.8	4.95		4.88
OV:OVCAR_5	4.88	5.23		5.05
OV:OVCAR_8	4.74	4.86		4.8
OV:SK_OV_3	4.79	4.84		4.82
OV:NCI_ADR_RES	-	4.94		4.94
PR:PC_3	-	5.33		5.33
PR:DU_145	-	4.78		4.78
RE:786_0	-	5.07		5.07
RE:A498	4.84	-		4.84
RE:ACHN	4.85	5.01		4.93
RE:CAKI_1	-	-		-
RE:RXF_393	5.33	5.45		5.39
RE:SN12C	4.87	4.98		4.93
RE:TK_10	4.83	5.12		4.98
RE:UO_31	-	5.4		5.4
Range b	1.31	1.24
Minumum c	4.47	4.78
Maximum d	5.78	6.03
Average e	5.01	5.28
Standard Deviation f	0.3	0.34
loghi g	0	0
a Drug activity derived from DTP data received Nov. 2010 from Joel Morris.
b Range calculated based on columns
c Minimum calculated based on columns
d Maximum calculated based on columns
e Average calculated based on columns
f Standard deviation calculated based on columns
g loghi provided by DPT
	Z scores			Z score
	9206NS14	9302ES18		average
BR:MCF7	-	-
BR:MDA_MB_231	-	5.77		1.45
BR:HS578T	-	5.36		0.24
BR:BT_549	-	4.84		-1.31
BR:T47D	-	5		-0.83
CNS:SF_268	4.89	4.97		-0.67
CNS:SF_295	4.8	5.36		-0.22
CNS:SF_539	4.83	5.32		-0.23
CNS:SNB_19	4.73	4.93		-0.99
CNS:SNB_75	5.24	5.24		0.31
CNS:U251	4.92	5.34		-0.08
CO:COLO205	4.97	5.8		0.71
CO:HCC_2998	5.08	5.75		0.82
CO:HCT_116	4.93	5.28		-0.13
CO:HCT_15	4.89	5.1		-0.48
CO:HT29	5.65	5.7		1.69
CO:KM12	4.96	5.62		0.41
CO:SW_620	4.87	5.37		-0.1
LE:CCRF_CEM	4.74	5.56		-0.04
LE:HL_60	5.25	5.11		0.15
LE:K_562	4.47	6.03		0.2
LE:MOLT_4	5.31	5.42		0.71
LE:RPMI_8226	-	5.29		0.02
LE:SR	4.91	4.95		-0.66
ME:LOXIMVI	5.13	5.76		0.9
ME:MALME_3M	5.41	5.68		1.26
ME:M14	5.74	5.78		1.95
ME:SK_MEL_2	4.95	5.48		0.21
ME:SK_MEL_28	5.78	5.74		1.95
ME:SK_MEL_5	5.03	5.76		0.75
ME:UACC_257	5.49	5.73		1.45
ME:UACC_62	5.69	5.66		1.7
ME:MDA_MB_435	-	5.48		0.58
ME:MDA_N	-	5.44		0.48
LC:A549	4.85	5		-0.69
LC:EKVX	4.82	4.81		-1.02
LC:HOP_62	4.85	4.9		-0.84
LC:HOP_92	5.14	5.05		-0.13
LC:NCI_H226	4.75	4.86		-1.06
LC:NCI_H23	4.79	4.95		-0.85
LC:NCI_H322M	4.87	4.99		-0.67
LC:NCI_H460	5.35	5.68		1.16
LC:NCI_H522	4.81	4.97		-0.81
OV:IGROV1	4.83	4.97		-0.76
OV:OVCAR_3	4.82	-		-0.62
OV:OVCAR_4	4.8	4.95		-0.84
OV:OVCAR_5	4.88	5.23		-0.3
OV:OVCAR_8	4.74	4.86		-1.08
OV:SK_OV_3	4.79	4.84		-1.02
OV:NCI_ADR_RES	-	4.94		-1.02
PR:PC_3	-	5.33		0.13
PR:DU_145	-	4.78		-1.47
RE:786_0	-	5.07		-0.63
RE:A498	4.84	-		-0.57
RE:ACHN	4.85	5.01		-0.66
RE:CAKI_1	-	-
RE:RXF_393	5.33	5.45		0.78
RE:SN12C	4.87	4.98		-0.68
RE:TK_10	4.83	5.12		-0.53
RE:UO_31	-	5.4		0.36
Range b	4.36	3.69
Minumum c	-1.81	-1.47
Maximum d	2.55	2.22
Average e	0	0
Standard Deviation f	1	1
loghi g	0	0
a Drug activity derived from DTP data received Nov. 2010 from Joel Morris.
b Range calculated based on columns
c Minimum calculated based on columns
d Maximum calculated based on columns
e Average calculated based on columns
f Standard deviation calculated based on columns
g loghi provided by DPT
J See "Z score use rationale and description" notes below.
	Quality control description
In order to be included in our analysis, experiments must pass the following steps:
	1. Remove all experiments with less than 1.2 fold change (log10).
	2. Remove all experiments with information for <35 cell lines.
	3. There is a maximum of 253 experiments allowed.
	4. Count the number of experiments that were recognized for the drug of interest, and passed the 1.2 fold criteria.
	5. Calculate 25% of that value unless this value exceeds the maximum and then it is set to the maximum.
	6. Calculate correlations for all possible experiment/experiment combinations.
	7. Drop all experiments for which all correlations are less than 0.334.
	8. Determine the average correlation for each experiment to all other experiments.
	9. If there are experiments with average correlations less than 0.60, drop the (experiment) with the lowest average correlation.
	10. Continue this recalculation of average correlations (from step 8), followed by dropping the lowest experiment until:
		a. There are less than 253 experiments from (step 3) AND
		b. All experiment averages are above 0.60, or the number of remaining experiments reaches the 25% value calculated in step 5.
	Z score use rationale and description.
We have adopted the use of z scores to allow us to more accurately combine from multiple platforms. A description of z scores appears below.
Z scores are a special application of the transformation rules. The z score for an item, indicates how far and in what direction, that item deviates
from its distribution's mean, expressed in units of its distribution's standard deviation. The mathematics of the z score transformation are such that if
every item in a distribution is converted to its z score, the transformed scores will necessarily have a mean of zero and a standard deviation of one.
Z scores are sometimes called "standard scores". The z score transformation is especially useful when seeking to compare the relative standings
of items from distributions with different means and/or different standard deviations.
Z scores are especially informative when the distribution to which they refer, is normal. In every normal distribution, the distance between the mean
and a given z score cuts off a fixed proportion of the total area under the curve.
The above description is reproduced from: http://www.sysurvey.com/tips/statistics/zscore.htm
Z scores are determined for each experiment/cell line pair by the subtraction from its intensity by the experiment mean (across the 60 cell lines),
and division by the standard deviation of the experiment (across the 60 cell lines). The z score average was then calculated as the mean
across all experiments that passed quality control criteria.

## Sheet: NSC 658098
NSC #: 658098				William C. Reinhold					Data downloaded from the public CellMiner Website:
				NIH					http://discover.nci.nih.gov/cellminer
Not FDA Approved				Laboratory of Molecular Pharmacology
12-09-2012				Phone	301-496-9572				See Reinhold et al. 2012 Cancer Research 72: 3499-511
Total probes found: 2				FAX	301-402-0752				http://www.ncbi.nlm.nih.gov/pubmed/22802077
Probes that passed quality control: 1				wcr@mail.nih.gov
CellMiner Database Version: 1.4
cell lines	average z scores
BR:MCF7	0.06
BR:MDA_MB_231	-0.6
BR:HS578T	-0.6
BR:BT_549	-0.6
BR:T47D	-0.44
CNS:SF_268	0.27
CNS:SF_295	-0.05
CNS:SF_539	3.53
CNS:SNB_19	-0.6
CNS:SNB_75	1.26
CNS:U251	-0.6
CO:COLO205	-0.6
CO:HCC_2998	-0.6
CO:HCT_116	-0.6
CO:HCT_15	-0.6
CO:HT29	-0.6
CO:KM12	-0.6
CO:SW_620	-0.6
LE:CCRF_CEM	1.09
LE:HL_60	1.49
LE:K_562	-0.6
LE:MOLT_4	-0.6
LE:RPMI_8226	-0.6
LE:SR	-0.6
ME:LOXIMVI	-0.6
ME:MALME_3M	-0.6
ME:M14	-0.6
ME:SK_MEL_2	-0.6
ME:SK_MEL_28	-0.6
ME:SK_MEL_5	-0.6
ME:UACC_257	-0.6
ME:UACC_62	0.47																	bins	Frequency in that bin
ME:MDA_MB_435	-0.6																	3.5	0
ME:MDA_N	-0.6																	3.8	39
LC:A549	-0.6																	4.1	10
LC:EKVX	-0.6																	4.4	7
LC:HOP_62	0.53																	4.7	2
LC:HOP_92	0.25																	5	2
LC:NCI_H226	-0.6																	5.3	0
LC:NCI_H23	-0.29																	5.6	0
LC:NCI_H322M	-0.6																	5.9	0
LC:NCI_H460	0.33
LC:NCI_H522	0.38
OV:IGROV1	0.82														p 'Cell line average activities' are found in the last column of the Activities Table.
OV:OVCAR_3	-0.6
OV:OVCAR_4	-0.6
OV:OVCAR_5	-0.6
OV:OVCAR_8	-0.6
OV:SK_OV_3	-0.55
OV:NCI_ADR_RES	-0.6
PR:PC_3	0.94
PR:DU_145	-0.6
RE:786_0	1.22
RE:A498	1.85
RE:ACHN	3.61
RE:CAKI_1	1.74
RE:RXF_393	2.08			Average negative log10 activities (not mean centered)
RE:SN12C	0.3				across all experiments (based on rows 73-76)
RE:TK_10	0.54				Range k			1.23
RE:UO_31	-0.6					Minimum l		4
						Maximum m		5.23
					Average n			4.17
					Standard Deviation o			0.29
				k Range calculated as the mean of drug activity derived from Joel Morris (DTP) data received Nov. 2010.
				l Minimum calculated as the mean of each experiment's minimum across cell lines (from the row 73 average activities).
				m Maximum calculated as the mean of each experiment's maximum across cell lines (from the row 74 average activities).
				n Average calculated as the mean of each experiment's average across cell lines (from the row 75 average activities).
				o Standard Deviation calculated as the mean of each experiment's atandard deviation across cell lines (from the row 76 average activities).
	Activities a		Cell line
	9303NS26		average activity i
BR:MCF7	4.19		4.19
BR:MDA_MB_231	4		4
BR:HS578T	4		4
BR:BT_549	4		4
BR:T47D	4.05		4.05
CNS:SF_268	4.25		4.25
CNS:SF_295	4.16		4.16
CNS:SF_539	5.21		5.21
CNS:SNB_19	4		4
CNS:SNB_75	4.54		4.54
CNS:U251	4		4
CO:COLO205	4		4
CO:HCC_2998	4		4
CO:HCT_116	4		4
CO:HCT_15	4		4
CO:HT29	4		4
CO:KM12	4		4
CO:SW_620	4		4
LE:CCRF_CEM	4.49		4.49
LE:HL_60	4.61		4.61
LE:K_562	4		4
LE:MOLT_4	4		4
LE:RPMI_8226	4		4
LE:SR	4		4
ME:LOXIMVI	4		4
ME:MALME_3M	4		4
ME:M14	4		4
ME:SK_MEL_2	4		4
ME:SK_MEL_28	4		4
ME:SK_MEL_5	4		4
ME:UACC_257	4		4
ME:UACC_62	4.31		4.31
ME:MDA_MB_435	4		4
ME:MDA_N	4		4
LC:A549	4		4
LC:EKVX	4		4
LC:HOP_62	4.33		4.33
LC:HOP_92	4.25		4.25
LC:NCI_H226	4		4
LC:NCI_H23	4.09		4.09
LC:NCI_H322M	4		4
LC:NCI_H460	4.27		4.27
LC:NCI_H522	4.28		4.28
OV:IGROV1	4.41		4.41
OV:OVCAR_3	4		4
OV:OVCAR_4	4		4
OV:OVCAR_5	4		4
OV:OVCAR_8	4		4
OV:SK_OV_3	4.01		4.01
OV:NCI_ADR_RES	4		4
PR:PC_3	4.45		4.45
PR:DU_145	4		4
RE:786_0	4.53		4.53
RE:A498	4.71		4.71
RE:ACHN	5.23		5.23
RE:CAKI_1	4.68		4.68
RE:RXF_393	4.78		4.78
RE:SN12C	4.26		4.26
RE:TK_10	4.33		4.33
RE:UO_31	4		4
Range b	1.23
Minumum c	4
Maximum d	5.23
Average e	4.17
Standard Deviation f	0.29
loghi g	0
a Drug activity derived from DTP data received Nov. 2010 from Joel Morris.
b Range calculated based on columns
c Minimum calculated based on columns
d Maximum calculated based on columns
e Average calculated based on columns
f Standard deviation calculated based on columns
g loghi provided by DPT
	Z scores		Z score
	9303NS26		average
BR:MCF7	4.19		0.06
BR:MDA_MB_231	4		-0.6
BR:HS578T	4		-0.6
BR:BT_549	4		-0.6
BR:T47D	4.05		-0.44
CNS:SF_268	4.25		0.27
CNS:SF_295	4.16		-0.05
CNS:SF_539	5.21		3.53
CNS:SNB_19	4		-0.6
CNS:SNB_75	4.54		1.26
CNS:U251	4		-0.6
CO:COLO205	4		-0.6
CO:HCC_2998	4		-0.6
CO:HCT_116	4		-0.6
CO:HCT_15	4		-0.6
CO:HT29	4		-0.6
CO:KM12	4		-0.6
CO:SW_620	4		-0.6
LE:CCRF_CEM	4.49		1.09
LE:HL_60	4.61		1.49
LE:K_562	4		-0.6
LE:MOLT_4	4		-0.6
LE:RPMI_8226	4		-0.6
LE:SR	4		-0.6
ME:LOXIMVI	4		-0.6
ME:MALME_3M	4		-0.6
ME:M14	4		-0.6
ME:SK_MEL_2	4		-0.6
ME:SK_MEL_28	4		-0.6
ME:SK_MEL_5	4		-0.6
ME:UACC_257	4		-0.6
ME:UACC_62	4.31		0.47
ME:MDA_MB_435	4		-0.6
ME:MDA_N	4		-0.6
LC:A549	4		-0.6
LC:EKVX	4		-0.6
LC:HOP_62	4.33		0.53
LC:HOP_92	4.25		0.25
LC:NCI_H226	4		-0.6
LC:NCI_H23	4.09		-0.29
LC:NCI_H322M	4		-0.6
LC:NCI_H460	4.27		0.33
LC:NCI_H522	4.28		0.38
OV:IGROV1	4.41		0.82
OV:OVCAR_3	4		-0.6
OV:OVCAR_4	4		-0.6
OV:OVCAR_5	4		-0.6
OV:OVCAR_8	4		-0.6
OV:SK_OV_3	4.01		-0.55
OV:NCI_ADR_RES	4		-0.6
PR:PC_3	4.45		0.94
PR:DU_145	4		-0.6
RE:786_0	4.53		1.22
RE:A498	4.71		1.85
RE:ACHN	5.23		3.61
RE:CAKI_1	4.68		1.74
RE:RXF_393	4.78		2.08
RE:SN12C	4.26		0.3
RE:TK_10	4.33		0.54
RE:UO_31	4		-0.6
Range b	4.21
Minumum c	-0.6
Maximum d	3.61
Average e	0
Standard Deviation f	1
loghi g	0
a Drug activity derived from DTP data received Nov. 2010 from Joel Morris.
b Range calculated based on columns
c Minimum calculated based on columns
d Maximum calculated based on columns
e Average calculated based on columns
f Standard deviation calculated based on columns
g loghi provided by DPT
J See "Z score use rationale and description" notes below.
	Quality control description
In order to be included in our analysis, experiments must pass the following steps:
	1. Remove all experiments with less than 1.2 fold change (log10).
	2. Remove all experiments with information for <35 cell lines.
	3. There is a maximum of 253 experiments allowed.
	4. Count the number of experiments that were recognized for the drug of interest, and passed the 1.2 fold criteria.
	5. Calculate 25% of that value unless this value exceeds the maximum and then it is set to the maximum.
	6. Calculate correlations for all possible experiment/experiment combinations.
	7. Drop all experiments for which all correlations are less than 0.334.
	8. Determine the average correlation for each experiment to all other experiments.
	9. If there are experiments with average correlations less than 0.60, drop the (experiment) with the lowest average correlation.
	10. Continue this recalculation of average correlations (from step 8), followed by dropping the lowest experiment until:
		a. There are less than 253 experiments from (step 3) AND
		b. All experiment averages are above 0.60, or the number of remaining experiments reaches the 25% value calculated in step 5.
	Z score use rationale and description.
We have adopted the use of z scores to allow us to more accurately combine from multiple platforms. A description of z scores appears below.
Z scores are a special application of the transformation rules. The z score for an item, indicates how far and in what direction, that item deviates
from its distribution's mean, expressed in units of its distribution's standard deviation. The mathematics of the z score transformation are such that if
every item in a distribution is converted to its z score, the transformed scores will necessarily have a mean of zero and a standard deviation of one.
Z scores are sometimes called "standard scores". The z score transformation is especially useful when seeking to compare the relative standings
of items from distributions with different means and/or different standard deviations.
Z scores are especially informative when the distribution to which they refer, is normal. In every normal distribution, the distance between the mean
and a given z score cuts off a fixed proportion of the total area under the curve.
The above description is reproduced from: http://www.sysurvey.com/tips/statistics/zscore.htm
Z scores are determined for each experiment/cell line pair by the subtraction from its intensity by the experiment mean (across the 60 cell lines),
and division by the standard deviation of the experiment (across the 60 cell lines). The z score average was then calculated as the mean
across all experiments that passed quality control criteria.
